# Supplementary material for: Association between clinical oral health status and perceived oral health in different age groups
Source: PeerJ. 2022 Oct 3;10:e14152. doi: 10.7717/peerj.14152 (PMC9536301; doi:10.7717/peerj.14152)
Supplement: Supplemental Information 1 [file peerj-10-14152-s001.xlsx]

## Sheet: Data FIle 
Sn	Gender	Age	YA	Adult	Old.Adult	Age.Cat	PSR.OHS	Edu	None	Primary	Secondary	Graduate	SES	TLDA	HCS	Reason	DFT	MT	PS	Peri.Score
1	M	20	Yes	No	No	Young Adult (15-25)	4.54	None	Yes	No	No	No	high	<1 year	private	preventive	28	0	0	2
2	F	20	Yes	No	No	Young Adult (15-25)	4.41	None	Yes	No	No	No	high	>1 year	private	preventive	20	0	0	1
3	M	20	Yes	No	No	Young Adult (15-25)	4.95	Primary	No	Yes	No	No	high	>1 year	private	preventive	51	1	0	2
4	M	21	Yes	No	No	Young Adult (15-25)	4.94	Primary	No	Yes	No	No	high	>1 year	private	preventive	28	1	0	2
5	M	23	Yes	No	No	Young Adult (15-25)	3.23	Primary	No	Yes	No	No	high	>1 year	private	preventive	31	1	0	3
6	M	19	Yes	No	No	Young Adult (15-25)	4.73	Primary	No	Yes	No	No	high	>1 year	public	preventive	35	0	0	2
7	F	23	Yes	No	No	Young Adult (15-25)	5.52	Primary	No	Yes	No	No	high	>1 year	private	curative	36	0	0	3
8	M	20	Yes	No	No	Young Adult (15-25)	6.04	Primary	No	Yes	No	No	high	<1 year	public	curative	30	0	0	0
9	F	21	Yes	No	No	Young Adult (15-25)	5.07	None	Yes	No	No	No	high	<1 year	public	curative	24	0	0	2
10	F	19	Yes	No	No	Young Adult (15-25)	4.55	None	Yes	No	No	No	high	<1 year	private	preventive	50	1	0	0
11	F	19	Yes	No	No	Young Adult (15-25)	3.08	None	Yes	No	No	No	high	<1 year	private	curative	25	1	0	3
12	M	18	Yes	No	No	Young Adult (15-25)	2.5	None	Yes	No	No	No	high	<1 year	private	preventive	14	1	0	0
13	F	19	Yes	No	No	Young Adult (15-25)	3.75	None	Yes	No	No	No	high	<1 year	private	preventive	24	2	0	4
14	F	20	Yes	No	No	Young Adult (15-25)	5.12	Secondary	No	Yes	Yes	No	high	<1 year	private	curative	3	0	0	0
15	M	20	Yes	No	No	Young Adult (15-25)	6.24	Primary	No	Yes	No	No	high	>1 year	public	curative	54	2	0	0
16	F	21	Yes	No	No	Young Adult (15-25)	5.91	None	Yes	No	No	No	high	>1 year	private	curative	70	2	0	1
17	F	20	Yes	No	No	Young Adult (15-25)	4.06	Primary	No	Yes	No	No	high	>1 year	public	preventive	27	2	0	1
18	M	23	Yes	No	No	Young Adult (15-25)	2.36	Primary	No	Yes	No	No	high	>1 year	public	preventive	42	1	0	2
19	M	22	Yes	No	No	Young Adult (15-25)	4.52	Secondary	No	Yes	Yes	No	high	>1 year	private	preventive	24	1	0	1
20	M	22	Yes	No	No	Young Adult (15-25)	5.33	Secondary	No	Yes	Yes	No	high	>1 year	private	preventive	14	0	0	2
21	F	21	Yes	No	No	Young Adult (15-25)	3.08	Secondary	No	Yes	Yes	No	high	<1 year	private	preventive	16	1	1	4
22	M	20	Yes	No	No	Young Adult (15-25)	5.22	None	Yes	No	No	No	high	<1 year	private	preventive	15	1	1	3
23	F	20	Yes	No	No	Young Adult (15-25)	5.29	Primary	No	Yes	No	No	high	<1 year	private	curative	25	1	0	4
24	F	21	Yes	No	No	Young Adult (15-25)	6.44	None	Yes	No	No	No	high	<1 year	public	curative	32	0	0	1
25	F	19	Yes	No	No	Young Adult (15-25)	4.27	None	Yes	No	No	No	high	<1 year	private	curative	53	1	1	1
26	M	19	Yes	No	No	Young Adult (15-25)	3.88	Primary	No	Yes	No	No	high	<1 year	public	preventive	24	1	1	1
27	F	19	Yes	No	No	Young Adult (15-25)	4.12	Primary	No	Yes	No	No	high	<1 year	public	curative	3	0	0	2
28	F	20	Yes	No	No	Young Adult (15-25)	4.29	Primary	No	Yes	No	No	high	>1 year	private	preventive	35	1	1	2
29	M	23	Yes	No	No	Young Adult (15-25)	3.12	Primary	No	Yes	No	No	high	>1 year	private	preventive	21	1	1	4
30	F	23	Yes	No	No	Young Adult (15-25)	5.1	Primary	No	Yes	No	No	high	>1 year	private	curative	22	1	0	3
31	F	20	Yes	No	No	Young Adult (15-25)	2.97	Primary	No	Yes	No	No	high	>1 year	private	curative	23	0	1	4
32	M	20	Yes	No	No	Young Adult (15-25)	4.62	None	Yes	No	No	No	high	>1 year	private	curative	33	1	1	1
33	M	20	Yes	No	No	Young Adult (15-25)	3.52	None	Yes	No	No	No	high	>1 year	public	preventive	62	1	1	1
34	M	21	Yes	No	No	Young Adult (15-25)	5.68	None	Yes	No	No	No	high	<1 year	private	preventive	27	1	0	1
35	F	23	Yes	No	No	Young Adult (15-25)	2.72	None	Yes	No	No	No	high	<1 year	public	preventive	2	0	0	2
36	M	19	Yes	No	No	Young Adult (15-25)	2.63	None	Yes	No	No	No	high	<1 year	public	preventive	24	1	1	2
37	F	23	Yes	No	No	Young Adult (15-25)	6.35	Secondary	No	Yes	Yes	No	high	<1 year	private	preventive	24	1	0	2
38	F	20	Yes	No	No	Young Adult (15-25)	2.53	Primary	No	Yes	No	No	high	<1 year	private	preventive	22	1	0	2
39	F	21	Yes	No	No	Young Adult (15-25)	3.79	None	Yes	No	No	No	high	<1 year	private	curative	12	0	1	4
40	M	19	Yes	No	No	Young Adult (15-25)	4.28	Primary	No	Yes	No	No	high	<1 year	private	curative	18	1	1	0
41	F	19	Yes	No	No	Young Adult (15-25)	3.44	Primary	No	Yes	No	No	high	>1 year	private	curative	14	1	1	2
42	F	18	Yes	No	No	Young Adult (15-25)	4.21	Secondary	No	Yes	Yes	No	high	>1 year	public	preventive	15	1	0	1
43	M	19	Yes	No	No	Young Adult (15-25)	3.7	Secondary	No	Yes	Yes	No	high	>1 year	private	curative	25	0	0	2
44	F	20	Yes	No	No	Young Adult (15-25)	5.7	Secondary	No	Yes	Yes	No	high	>1 year	public	preventive	28	0	1	2
45	F	20	Yes	No	No	Young Adult (15-25)	4.76	None	Yes	No	No	No	high	>1 year	public	preventive	29	1	1	3
46	M	21	Yes	No	No	Young Adult (15-25)	3.93	Primary	No	Yes	No	No	high	>1 year	private	curative	32	1	0	2
47	M	20	Yes	No	No	Young Adult (15-25)	3.06	None	Yes	No	No	No	high	<1 year	private	curative	33	1	1	3
48	M	23	Yes	No	No	Young Adult (15-25)	5.87	None	Yes	No	No	No	high	<1 year	private	curative	34	1	1	0
49	F	22	Yes	No	No	Young Adult (15-25)	6.08	Primary	No	Yes	No	No	high	<1 year	private	preventive	35	0	0	2
50	M	22	Yes	No	No	Young Adult (15-25)	3.12	Primary	No	Yes	No	No	high	<1 year	private	preventive	54	0	1	0
51	F	21	Yes	No	No	Young Adult (15-25)	2.48	Primary	No	Yes	No	No	high	<1 year	public	preventive	50	1	1	3
52	F	20	Yes	No	No	Young Adult (15-25)	2.94	Primary	No	Yes	No	No	high	<1 year	private	preventive	28	1	1	0
53	F	20	Yes	No	No	Young Adult (15-25)	6.19	Primary	No	Yes	No	No	high	<1 year	public	preventive	20	0	1	4
54	M	21	Yes	No	No	Young Adult (15-25)	5.04	Primary	No	Yes	No	No	high	>1 year	public	preventive	51	0	1	0
55	F	19	Yes	No	No	Young Adult (15-25)	3.72	None	Yes	No	No	No	high	>1 year	private	curative	28	1	0	0
56	F	19	Yes	No	No	Young Adult (15-25)	3.86	None	Yes	No	No	No	high	>1 year	private	curative	31	0	0	1
57	M	19	Yes	No	No	Young Adult (15-25)	2.99	None	Yes	No	No	No	high	>1 year	private	curative	35	1	1	1
58	F	20	Yes	No	No	Young Adult (15-25)	6.13	None	Yes	No	No	No	high	>1 year	private	preventive	36	0	1	2
59	F	23	Yes	No	No	Young Adult (15-25)	5.78	None	Yes	No	No	No	high	>1 year	private	curative	30	1	0	1
60	M	23	Yes	No	No	Young Adult (15-25)	2.39	Secondary	No	Yes	Yes	No	high	<1 year	public	preventive	24	1	0	2
61	M	20	Yes	No	No	Young Adult (15-25)	2.48	Primary	No	Yes	No	No	high	<1 year	private	preventive	50	0	1	4
62	M	20	Yes	No	No	Young Adult (15-25)	6.43	None	Yes	No	No	No	high	<1 year	public	curative	25	1	1	3
63	F	20	Yes	No	No	Young Adult (15-25)	3.98	Primary	No	Yes	No	No	high	<1 year	public	curative	14	1	1	4
64	M	21	Yes	No	No	Young Adult (15-25)	5.45	Primary	No	Yes	No	No	high	<1 year	private	curative	24	1	0	1
65	F	23	Yes	No	No	Young Adult (15-25)	3.23	Secondary	No	Yes	Yes	No	high	<1 year	private	preventive	3	1	1	1
66	F	19	Yes	No	No	Young Adult (15-25)	4.81	Secondary	No	Yes	Yes	No	high	<1 year	private	preventive	54	1	1	1
67	F	23	Yes	No	No	Young Adult (15-25)	3.45	Secondary	No	Yes	Yes	No	high	>1 year	private	preventive	70	0	1	2
68	M	20	Yes	No	No	Young Adult (15-25)	5.26	None	Yes	No	No	No	high	>1 year	private	preventive	27	0	1	2
69	F	21	Yes	No	No	Young Adult (15-25)	4.27	Primary	No	Yes	No	No	high	>1 year	public	preventive	42	1	1	2
70	F	19	Yes	No	No	Young Adult (15-25)	4.78	None	Yes	No	No	No	high	>1 year	private	preventive	24	1	1	2
71	M	19	Yes	No	No	Young Adult (15-25)	3.95	None	Yes	No	No	No	high	>1 year	public	curative	14	0	1	4
72	F	18	Yes	No	No	Young Adult (15-25)	3.21	Primary	No	Yes	No	No	high	>1 year	public	curative	16	1	1	0
73	F	19	Yes	No	No	Young Adult (15-25)	3.36	Primary	No	Yes	No	No	high	<1 year	private	curative	15	0	1	2
74	M	20	Yes	No	No	Young Adult (15-25)	2.9	Primary	No	Yes	No	No	high	<1 year	private	preventive	25	1	0	1
75	M	20	Yes	No	No	Young Adult (15-25)	4.15	Primary	No	Yes	No	No	high	<1 year	private	curative	32	0	1	2
76	M	21	Yes	No	No	Young Adult (15-25)	6.14	Primary	No	Yes	No	No	high	<1 year	private	preventive	53	1	1	2
77	F	20	Yes	No	No	Young Adult (15-25)	5.64	Primary	No	Yes	No	No	high	<1 year	private	preventive	24	0	1	3
78	M	23	Yes	No	No	Young Adult (15-25)	5.51	None	Yes	No	No	No	high	>1 year	public	curative	3	1	1	2
79	F	22	Yes	No	No	Young Adult (15-25)	2.44	None	Yes	No	No	No	high	>1 year	private	curative	35	0	1	3
80	F	22	Yes	No	No	Young Adult (15-25)	5.24	None	Yes	No	No	No	high	>1 year	public	curative	21	0	1	0
81	F	21	Yes	No	No	Young Adult (15-25)	4.85	None	Yes	No	No	No	high	>1 year	public	preventive	22	1	1	2
82	M	20	Yes	No	No	Young Adult (15-25)	2.7	None	Yes	No	No	No	high	>1 year	private	preventive	23	0	1	0
83	F	20	Yes	No	No	Young Adult (15-25)	3.06	Secondary	No	Yes	Yes	No	high	>1 year	private	preventive	33	0	1	3
84	F	21	Yes	No	No	Young Adult (15-25)	3.41	Primary	No	Yes	No	No	high	<1 year	private	preventive	62	0	1	0
85	M	19	Yes	No	No	Young Adult (15-25)	4.78	None	Yes	No	No	No	high	<1 year	private	preventive	27	0	1	4
86	F	19	Yes	No	No	Young Adult (15-25)	3.75	Primary	No	Yes	No	No	high	<1 year	private	preventive	2	0	1	0
87	F	19	Yes	No	No	Young Adult (15-25)	6.1	Primary	No	Yes	No	No	high	<1 year	public	curative	24	0	1	0
88	M	20	Yes	No	No	Young Adult (15-25)	3.49	Secondary	No	Yes	Yes	No	high	<1 year	private	curative	24	1	1	1
89	M	23	Yes	No	No	Young Adult (15-25)	5.79	Secondary	No	Yes	Yes	No	high	<1 year	public	curative	22	0	1	1
90	M	23	Yes	No	No	Young Adult (15-25)	4.8	Secondary	No	Yes	Yes	No	high	<1 year	public	preventive	12	0	1	2
91	F	20	Yes	No	No	Young Adult (15-25)	4.92	None	Yes	No	No	No	high	>1 year	private	curative	18	0	1	1
92	M	20	Yes	No	No	Young Adult (15-25)	4.29	Primary	No	Yes	No	No	high	>1 year	private	preventive	14	1	1	2
93	F	20	Yes	No	No	Young Adult (15-25)	6.41	Graduate	No	No	No	Yes	high	>1 year	private	preventive	15	0	1	4
94	F	21	Yes	No	No	Young Adult (15-25)	3.92	Graduate	No	No	No	Yes	high	>1 year	private	curative	25	0	1	3
95	F	23	Yes	No	No	Young Adult (15-25)	6.11	Graduate	No	No	No	Yes	high	>1 year	private	curative	28	1	1	4
96	M	19	Yes	No	No	Young Adult (15-25)	6.08	Primary	No	Yes	No	No	high	>1 year	public	curative	29	0	1	1
97	F	23	Yes	No	No	Young Adult (15-25)	6.48	Primary	No	Yes	No	No	high	<1 year	private	preventive	32	0	1	1
98	F	20	Yes	No	No	Young Adult (15-25)	4.71	Secondary	No	Yes	Yes	No	high	<1 year	public	preventive	33	0	1	1
99	M	21	Yes	No	No	Young Adult (15-25)	4.53	Secondary	No	Yes	Yes	No	high	<1 year	public	preventive	34	1	1	2
100	F	19	Yes	No	No	Young Adult (15-25)	3.74	Secondary	No	Yes	Yes	No	high	<1 year	private	preventive	35	0	1	2
101	F	19	Yes	No	No	Young Adult (15-25)	4.58	None	Yes	No	No	No	high	<1 year	private	preventive	54	1	1	2
102	M	18	Yes	No	No	Young Adult (15-25)	4.07	Primary	No	Yes	No	No	high	<1 year	private	preventive	50	0	0	2
103	M	19	Yes	No	No	Young Adult (15-25)	2.98	None	Yes	No	No	No	high	<1 year	private	curative	28	0	0	4
104	M	20	Yes	No	No	Young Adult (15-25)	3.11	None	Yes	No	No	No	high	>1 year	private	curative	20	0	0	0
105	F	20	Yes	No	No	Young Adult (15-25)	5.46	Primary	No	Yes	No	No	high	>1 year	public	curative	51	0	0	2
106	M	21	Yes	No	No	Young Adult (15-25)	4.1	Primary	No	Yes	No	No	high	>1 year	private	preventive	28	0	0	1
107	F	20	Yes	No	No	Young Adult (15-25)	4.94	Primary	No	Yes	No	No	high	>1 year	public	curative	31	0	0	2
108	F	23	Yes	No	No	Young Adult (15-25)	4.32	Primary	No	Yes	No	No	high	>1 year	public	preventive	35	0	0	2
109	F	22	Yes	No	No	Young Adult (15-25)	4.93	Primary	No	Yes	No	No	high	>1 year	private	preventive	36	0	0	3
110	M	22	Yes	No	No	Young Adult (15-25)	4.33	Primary	No	Yes	No	No	high	<1 year	private	curative	30	0	0	2
111	F	21	Yes	No	No	Young Adult (15-25)	2.93	None	Yes	No	No	No	high	<1 year	private	curative	24	0	0	3
112	F	20	Yes	No	No	Young Adult (15-25)	6.16	None	Yes	No	No	No	high	<1 year	private	curative	50	0	0	0
113	M	20	Yes	No	No	Young Adult (15-25)	3.29	None	Yes	No	No	No	high	<1 year	private	preventive	25	0	0	2
114	F	21	Yes	No	No	Young Adult (15-25)	2.86	None	Yes	No	No	No	high	<1 year	public	preventive	14	0	0	0
115	F	19	Yes	No	No	Young Adult (15-25)	4.24	None	Yes	No	No	No	high	<1 year	private	preventive	24	0	0	3
116	M	19	Yes	No	No	Young Adult (15-25)	4.29	Secondary	No	Yes	Yes	No	high	<1 year	public	preventive	3	0	0	0
117	M	19	Yes	No	No	Young Adult (15-25)	4.56	Primary	No	Yes	No	No	high	>1 year	public	preventive	54	0	0	4
118	M	20	Yes	No	No	Young Adult (15-25)	5.56	None	Yes	No	No	No	high	>1 year	private	preventive	70	0	0	0
119	F	23	Yes	No	No	Young Adult (15-25)	5.43	Primary	No	Yes	No	No	high	>1 year	private	curative	27	1	0	0
120	M	23	Yes	No	No	Young Adult (15-25)	3.71	Primary	No	Yes	No	No	high	>1 year	private	curative	42	1	0	1
121	F	20	Yes	No	No	Young Adult (15-25)	4.92	Secondary	No	Yes	Yes	No	high	>1 year	private	curative	24	0	0	1
122	F	20	Yes	No	No	Young Adult (15-25)	5.32	Secondary	No	Yes	Yes	No	high	>1 year	private	preventive	14	1	1	2
123	F	20	Yes	No	No	Young Adult (15-25)	3.44	Secondary	No	Yes	Yes	No	high	<1 year	public	curative	16	1	1	1
124	M	21	Yes	No	No	Young Adult (15-25)	3.21	None	Yes	No	No	No	high	<1 year	private	preventive	15	1	0	2
125	F	23	Yes	No	No	Young Adult (15-25)	5.16	Primary	No	Yes	No	No	high	<1 year	public	preventive	25	0	0	4
126	F	19	Yes	No	No	Young Adult (15-25)	6.24	Graduate	No	No	No	Yes	high	<1 year	public	curative	32	1	1	3
127	M	23	Yes	No	No	Young Adult (15-25)	3.71	Graduate	No	No	No	Yes	high	<1 year	private	curative	53	1	1	4
128	F	20	Yes	No	No	Young Adult (15-25)	4.29	Graduate	No	No	No	Yes	high	<1 year	private	curative	24	0	0	1
129	F	21	Yes	No	No	Young Adult (15-25)	2.41	Primary	No	Yes	No	No	high	<1 year	private	preventive	3	1	1	1
130	M	19	Yes	No	No	Young Adult (15-25)	3.3	Primary	No	Yes	No	No	high	>1 year	private	preventive	35	1	1	1
131	M	19	Yes	No	No	Young Adult (15-25)	3.14	Secondary	No	Yes	Yes	No	high	>1 year	private	preventive	21	1	0	2
132	M	18	Yes	No	No	Young Adult (15-25)	5.3	Secondary	No	Yes	Yes	No	high	>1 year	public	preventive	22	0	1	2
133	F	19	Yes	No	No	Young Adult (15-25)	3.94	Secondary	No	Yes	Yes	No	high	>1 year	private	preventive	23	1	1	4
134	M	20	Yes	No	No	Young Adult (15-25)	2.96	None	Yes	No	No	No	high	>1 year	public	preventive	33	1	1	3
135	F	20	Yes	No	No	Young Adult (15-25)	5.69	Primary	No	Yes	No	No	high	>1 year	public	curative	62	1	0	4
136	F	21	Yes	No	No	Young Adult (15-25)	3.56	None	Yes	No	No	No	high	<1 year	private	curative	27	0	0	1
137	F	20	Yes	No	No	Young Adult (15-25)	2.76	None	Yes	No	No	No	high	<1 year	private	curative	2	1	1	1
138	M	23	Yes	No	No	Young Adult (15-25)	5.3	Primary	No	Yes	No	No	high	<1 year	private	preventive	24	1	0	1
139	F	22	Yes	No	No	Young Adult (15-25)	3.3	Primary	No	Yes	No	No	high	<1 year	private	curative	24	1	0	2
140	F	22	Yes	No	No	Young Adult (15-25)	3.97	Primary	No	Yes	No	No	high	<1 year	private	preventive	22	0	1	2
141	M	21	Yes	No	No	Young Adult (15-25)	5.93	Primary	No	Yes	No	No	high	<1 year	public	preventive	12	1	1	2
142	F	20	Yes	No	No	Young Adult (15-25)	2.34	Primary	No	Yes	No	No	high	<1 year	private	curative	18	1	1	2
143	F	20	Yes	No	No	Young Adult (15-25)	6.25	Primary	No	Yes	No	No	high	>1 year	public	curative	14	1	0	4
144	M	21	Yes	No	No	Young Adult (15-25)	5.82	None	Yes	No	No	No	high	>1 year	public	curative	15	0	0	0
145	M	19	Yes	No	No	Young Adult (15-25)	4.04	None	Yes	No	No	No	high	>1 year	private	preventive	25	0	1	2
146	M	19	Yes	No	No	Young Adult (15-25)	3.71	None	Yes	No	No	No	high	>1 year	private	preventive	28	1	1	1
147	F	19	Yes	No	No	Young Adult (15-25)	6.54	None	Yes	No	No	No	high	>1 year	private	preventive	29	1	0	2
148	M	20	Yes	No	No	Young Adult (15-25)	5.83	None	Yes	No	No	No	high	>1 year	private	preventive	32	1	1	2
149	F	23	Yes	No	No	Young Adult (15-25)	3.43	Secondary	No	Yes	Yes	No	high	<1 year	private	preventive	33	1	1	3
150	F	23	Yes	No	No	Young Adult (15-25)	4.17	Primary	No	Yes	No	No	high	<1 year	public	preventive	34	0	0	2
151	F	20	Yes	No	No	Young Adult (15-25)	2.93	None	Yes	No	No	No	high	<1 year	private	curative	35	0	1	3
152	M	20	Yes	No	No	Young Adult (15-25)	6.4	Primary	No	Yes	No	No	high	<1 year	public	curative	54	1	1	0
153	F	20	Yes	No	No	Young Adult (15-25)	3.55	Primary	No	Yes	No	No	high	<1 year	public	curative	50	1	1	2
154	F	21	Yes	No	No	Young Adult (15-25)	3.86	Secondary	No	Yes	Yes	No	high	>1 year	private	preventive	28	0	1	0
155	M	23	Yes	No	No	Young Adult (15-25)	3.85	Secondary	No	Yes	Yes	No	high	>1 year	private	curative	20	0	1	3
156	F	19	Yes	No	No	Young Adult (15-25)	5.55	Secondary	No	Yes	Yes	No	high	>1 year	private	preventive	51	1	0	0
157	F	23	Yes	No	No	Young Adult (15-25)	5.42	None	Yes	No	No	No	high	>1 year	private	preventive	28	0	0	4
158	M	20	Yes	No	No	Young Adult (15-25)	2.54	Primary	No	Yes	No	No	high	>1 year	private	curative	31	1	1	0
159	M	21	Yes	No	No	Young Adult (15-25)	5.74	Graduate	No	No	No	Yes	high	>1 year	public	curative	35	0	1	0
160	M	19	Yes	No	No	Young Adult (15-25)	5.47	Graduate	No	No	No	Yes	high	<1 year	private	curative	36	1	0	1
161	F	19	Yes	No	No	Young Adult (15-25)	5.59	Graduate	No	No	No	Yes	high	<1 year	public	preventive	30	1	0	1
162	M	18	Yes	No	No	Young Adult (15-25)	6.12	Primary	No	Yes	No	No	high	<1 year	public	preventive	24	0	1	2
163	F	19	Yes	No	No	Young Adult (15-25)	4.67	Primary	No	Yes	No	No	high	<1 year	private	preventive	50	1	1	1
164	F	20	Yes	No	No	Young Adult (15-25)	4.86	Secondary	No	Yes	Yes	No	high	<1 year	private	preventive	25	1	1	2
165	F	20	Yes	No	No	Young Adult (15-25)	5.1	Secondary	No	Yes	Yes	No	high	<1 year	private	preventive	14	1	0	4
166	M	21	Yes	No	No	Young Adult (15-25)	4.2	Secondary	No	Yes	Yes	No	high	<1 year	private	preventive	24	1	1	3
167	F	20	Yes	No	No	Young Adult (15-25)	6.43	None	Yes	No	No	No	high	>1 year	private	curative	3	1	1	4
168	F	23	Yes	No	No	Young Adult (15-25)	3.55	Primary	No	Yes	No	No	high	>1 year	public	curative	54	0	1	1
169	M	22	Yes	No	No	Young Adult (15-25)	2.8	None	Yes	No	No	No	high	>1 year	private	curative	70	0	1	1
170	F	22	Yes	No	No	Young Adult (15-25)	5.79	None	Yes	No	No	No	high	>1 year	public	preventive	27	1	1	1
171	F	21	Yes	No	No	Young Adult (15-25)	6.47	Primary	No	Yes	No	No	high	>1 year	public	curative	42	1	1	2
172	M	20	Yes	No	No	Young Adult (15-25)	3.16	Primary	No	Yes	No	No	high	>1 year	private	preventive	24	0	1	2
173	M	20	Yes	No	No	Young Adult (15-25)	3.52	Primary	No	Yes	No	No	high	<1 year	private	preventive	14	1	1	2
174	M	21	Yes	No	No	Young Adult (15-25)	5.36	Primary	No	Yes	No	No	high	<1 year	private	curative	16	0	1	2
175	F	19	Yes	No	No	Young Adult (15-25)	2.56	Primary	No	Yes	No	No	high	<1 year	private	curative	15	1	0	4
176	M	19	Yes	No	No	Young Adult (15-25)	2.29	Primary	No	Yes	No	No	high	<1 year	private	curative	25	0	1	0
177	F	19	Yes	No	No	Young Adult (15-25)	3.93	None	Yes	No	No	No	high	<1 year	public	preventive	32	1	1	2
178	F	20	Yes	No	No	Young Adult (15-25)	3.68	None	Yes	No	No	No	high	<1 year	private	preventive	53	0	1	1
179	F	23	Yes	No	No	Young Adult (15-25)	4.92	None	Yes	No	No	No	high	<1 year	public	preventive	24	1	1	2
180	M	23	Yes	No	No	Young Adult (15-25)	6.42	None	Yes	No	No	No	high	>1 year	public	preventive	3	0	1	2
181	F	20	Yes	No	No	Young Adult (15-25)	5.2	None	Yes	No	No	No	high	>1 year	private	preventive	35	0	1	3
182	F	20	Yes	No	No	Young Adult (15-25)	3.92	Secondary	No	Yes	Yes	No	high	>1 year	private	preventive	21	1	1	2
183	M	20	Yes	No	No	Young Adult (15-25)	3.72	Primary	No	Yes	No	No	high	>1 year	private	curative	22	0	1	3
184	F	21	Yes	No	No	Young Adult (15-25)	3.49	None	Yes	No	No	No	high	>1 year	private	curative	23	0	1	0
185	F	23	Yes	No	No	Young Adult (15-25)	5.2	Primary	No	Yes	No	No	high	>1 year	private	curative	33	0	1	2
186	M	19	Yes	No	No	Young Adult (15-25)	3.27	Primary	No	Yes	No	No	high	<1 year	public	preventive	62	0	1	0
187	M	23	Yes	No	No	Young Adult (15-25)	4.85	Secondary	No	Yes	Yes	No	high	<1 year	private	curative	27	0	1	3
188	M	20	Yes	No	No	Young Adult (15-25)	2.47	Secondary	No	Yes	Yes	No	high	<1 year	public	preventive	2	0	1	0
189	F	21	Yes	No	No	Young Adult (15-25)	2.88	Secondary	No	Yes	Yes	No	high	<1 year	public	preventive	24	1	1	4
190	M	19	Yes	No	No	Young Adult (15-25)	5.37	None	Yes	No	No	No	high	<1 year	private	curative	24	0	1	0
191	F	19	Yes	No	No	Young Adult (15-25)	3.38	Primary	No	Yes	No	No	high	<1 year	private	curative	22	0	1	0
192	F	18	Yes	No	No	Young Adult (15-25)	6.09	Graduate	No	No	No	Yes	high	<1 year	private	curative	12	0	1	1
193	F	19	Yes	No	No	Young Adult (15-25)	6.09	Graduate	No	No	No	Yes	high	>1 year	private	preventive	18	1	1	1
194	M	20	Yes	No	No	Young Adult (15-25)	5.43	Graduate	No	No	No	Yes	high	>1 year	private	preventive	14	0	1	2
195	F	20	Yes	No	No	Young Adult (15-25)	3.65	Primary	No	Yes	No	No	high	>1 year	public	preventive	15	0	1	1
196	F	21	Yes	No	No	Young Adult (15-25)	2.9	Primary	No	Yes	No	No	high	>1 year	private	preventive	25	1	1	2
197	M	20	Yes	No	No	Young Adult (15-25)	4.89	Secondary	No	Yes	Yes	No	high	>1 year	public	preventive	28	0	1	4
198	F	23	Yes	No	No	Young Adult (15-25)	5.2	Secondary	No	Yes	Yes	No	high	>1 year	public	preventive	29	0	1	3
199	F	22	Yes	No	No	Young Adult (15-25)	5.01	Secondary	No	Yes	Yes	No	high	<1 year	private	curative	32	0	1	4
200	M	22	Yes	No	No	Young Adult (15-25)	2.81	None	Yes	No	No	No	high	<1 year	private	curative	33	1	1	1
201	M	21	Yes	No	No	Young Adult (15-25)	2.61	Primary	No	Yes	No	No	high	<1 year	private	curative	34	0	1	1
202	M	20	Yes	No	No	Young Adult (15-25)	3.43	None	Yes	No	No	No	high	<1 year	private	preventive	35	1	1	1
203	F	20	Yes	No	No	Young Adult (15-25)	4.09	None	Yes	No	No	No	high	<1 year	private	curative	54	0	0	2
204	M	21	Yes	No	No	Young Adult (15-25)	3.33	Primary	No	Yes	No	No	high	<1 year	public	preventive	50	0	0	2
205	F	19	Yes	No	No	Young Adult (15-25)	4.3	Primary	No	Yes	No	No	high	<1 year	private	preventive	28	0	0	2
206	F	19	Yes	No	No	Young Adult (15-25)	4.01	Primary	No	Yes	No	No	high	>1 year	public	curative	20	0	0	2
207	F	19	Yes	No	No	Young Adult (15-25)	4.12	Primary	No	Yes	No	No	high	>1 year	public	curative	51	0	0	4
208	M	20	Yes	No	No	Young Adult (15-25)	5.9	Primary	No	Yes	No	No	high	>1 year	private	curative	28	0	0	0
209	F	23	Yes	No	No	Young Adult (15-25)	6.54	Primary	No	Yes	No	No	high	>1 year	private	preventive	31	0	0	2
210	F	23	Yes	No	No	Young Adult (15-25)	2.61	None	Yes	No	No	No	high	>1 year	private	preventive	35	0	0	1
211	M	20	Yes	No	No	Young Adult (15-25)	2.43	None	Yes	No	No	No	high	>1 year	private	preventive	36	0	0	2
212	F	20	Yes	No	No	Young Adult (15-25)	4.39	None	Yes	No	No	No	high	<1 year	private	preventive	30	0	0	2
213	F	20	Yes	No	No	Young Adult (15-25)	4.1	None	Yes	No	No	No	high	<1 year	public	preventive	24	0	0	3
214	M	21	Yes	No	No	Young Adult (15-25)	5.75	None	Yes	No	No	No	high	<1 year	private	preventive	50	0	0	2
215	M	23	Yes	No	No	Young Adult (15-25)	5.87	Secondary	No	Yes	Yes	No	high	<1 year	public	curative	25	0	0	3
216	M	19	Yes	No	No	Young Adult (15-25)	3.3	Primary	No	Yes	No	No	high	<1 year	public	curative	14	0	0	0
217	F	23	Yes	No	No	Young Adult (15-25)	4.76	None	Yes	No	No	No	high	<1 year	private	curative	24	0	0	2
218	M	20	Yes	No	No	Young Adult (15-25)	2.28	Primary	No	Yes	No	No	high	<1 year	private	preventive	3	0	0	0
219	F	21	Yes	No	No	Young Adult (15-25)	2.29	Primary	No	Yes	No	No	high	>1 year	private	curative	54	0	0	3
220	F	19	Yes	No	No	Young Adult (15-25)	4.56	Secondary	No	Yes	Yes	No	high	>1 year	private	preventive	70	1	0	0
221	F	19	Yes	No	No	Young Adult (15-25)	3.08	Secondary	No	Yes	Yes	No	high	>1 year	private	preventive	27	1	0	4
222	M	18	Yes	No	No	Young Adult (15-25)	5.2	Secondary	No	Yes	Yes	No	high	>1 year	public	curative	42	0	0	0
223	F	19	Yes	No	No	Young Adult (15-25)	4.27	None	Yes	No	No	No	high	>1 year	private	curative	24	1	1	0
224	F	20	Yes	No	No	Young Adult (15-25)	2.58	Primary	No	Yes	No	No	high	>1 year	public	curative	14	1	1	1
225	M	20	Yes	No	No	Young Adult (15-25)	4.37	Graduate	No	No	No	Yes	high	<1 year	public	preventive	16	1	0	1
226	F	21	Yes	No	No	Young Adult (15-25)	3.35	Graduate	No	No	No	Yes	high	<1 year	private	preventive	15	0	0	2
227	F	20	Yes	No	No	Young Adult (15-25)	6.56	Graduate	No	No	No	Yes	high	<1 year	private	preventive	25	1	1	1
228	M	23	Yes	No	No	Young Adult (15-25)	6.38	Primary	No	Yes	No	No	high	<1 year	private	preventive	32	1	1	2
229	M	22	Yes	No	No	Young Adult (15-25)	3.9	Primary	No	Yes	No	No	high	<1 year	private	preventive	53	0	0	4
230	M	22	Yes	No	No	Young Adult (15-25)	3.42	Secondary	No	Yes	Yes	No	high	>1 year	private	preventive	24	1	1	3
231	F	21	Yes	No	No	Young Adult (15-25)	6.2	Secondary	No	Yes	Yes	No	high	>1 year	public	curative	3	1	1	4
232	M	20	Yes	No	No	Young Adult (15-25)	4.13	Secondary	No	Yes	Yes	No	high	>1 year	private	curative	35	1	0	1
233	F	20	Yes	No	No	Young Adult (15-25)	2.68	None	Yes	No	No	No	high	>1 year	public	curative	21	0	1	1
234	F	21	Yes	No	No	Young Adult (15-25)	3.7	Primary	No	Yes	No	No	high	>1 year	public	preventive	22	1	1	1
235	F	19	Yes	No	No	Young Adult (15-25)	3.92	None	Yes	No	No	No	high	>1 year	private	curative	23	1	1	2
236	M	19	Yes	No	No	Young Adult (15-25)	5.15	None	Yes	No	No	No	high	<1 year	private	preventive	33	1	0	2
237	F	19	Yes	No	No	Young Adult (15-25)	3.7	Primary	No	Yes	No	No	high	<1 year	private	preventive	62	0	0	4
238	F	20	Yes	No	No	Young Adult (15-25)	5.29	Primary	No	Yes	No	No	high	<1 year	private	curative	27	1	1	3
239	M	23	Yes	No	No	Young Adult (15-25)	4.1	Primary	No	Yes	No	No	high	<1 year	private	curative	2	1	0	4
240	F	23	Yes	No	No	Young Adult (15-25)	6.44	Primary	No	Yes	No	No	high	<1 year	public	curative	24	1	0	1
241	F	20	Yes	No	No	Young Adult (15-25)	3.5	Primary	No	Yes	No	No	high	<1 year	private	preventive	24	0	1	1
242	M	20	Yes	No	No	Young Adult (15-25)	4.01	Primary	No	Yes	No	No	high	<1 year	public	preventive	22	1	1	1
243	M	20	Yes	No	No	Young Adult (15-25)	2.7	None	Yes	No	No	No	high	>1 year	public	preventive	12	1	1	2
244	M	21	Yes	No	No	Young Adult (15-25)	2.72	None	Yes	No	No	No	high	>1 year	private	preventive	18	1	0	2
245	F	23	Yes	No	No	Young Adult (15-25)	6.46	None	Yes	No	No	No	high	>1 year	private	preventive	14	0	0	2
246	M	19	Yes	No	No	Young Adult (15-25)	4.77	None	Yes	No	No	No	high	>1 year	private	preventive	15	0	1	2
247	F	23	Yes	No	No	Young Adult (15-25)	4.05	None	Yes	No	No	No	high	>1 year	private	curative	25	1	1	4
248	F	20	Yes	No	No	Young Adult (15-25)	2.7	Secondary	No	Yes	Yes	No	high	>1 year	private	curative	28	1	0	0
249	F	21	Yes	No	No	Young Adult (15-25)	5.64	Primary	No	Yes	No	No	high	<1 year	public	curative	29	1	1	2
250	M	19	Yes	No	No	Young Adult (15-25)	5.84	None	Yes	No	No	No	high	<1 year	private	preventive	32	1	1	1
251	F	19	Yes	No	No	Young Adult (15-25)	3.93	Primary	No	Yes	No	No	high	<1 year	public	curative	33	0	0	2
252	F	18	Yes	No	No	Young Adult (15-25)	2.44	Primary	No	Yes	No	No	high	<1 year	public	preventive	34	0	1	2
253	M	19	Yes	No	No	Young Adult (15-25)	3.82	Secondary	No	Yes	Yes	No	high	<1 year	private	preventive	35	1	1	3
254	F	20	Yes	No	No	Young Adult (15-25)	5.06	Secondary	No	Yes	Yes	No	high	<1 year	private	curative	54	1	1	2
255	F	20	Yes	No	No	Young Adult (15-25)	3.77	Secondary	No	Yes	Yes	No	high	<1 year	private	curative	50	0	1	3
256	M	21	Yes	No	No	Young Adult (15-25)	2.75	None	Yes	No	No	No	high	>1 year	private	curative	28	0	1	0
257	M	20	Yes	No	No	Young Adult (15-25)	4.1	Primary	No	Yes	No	No	high	>1 year	private	preventive	20	1	0	2
258	M	23	Yes	No	No	Young Adult (15-25)	5.01	Graduate	No	No	No	Yes	high	>1 year	public	preventive	51	0	0	0
259	F	22	Yes	No	No	Young Adult (15-25)	2.56	Graduate	No	No	No	Yes	high	>1 year	private	preventive	28	1	1	3
260	M	22	Yes	No	No	Young Adult (15-25)	4.06	Graduate	No	No	No	Yes	high	>1 year	public	preventive	31	0	1	0
261	F	21	Yes	No	No	Young Adult (15-25)	3.33	Primary	No	Yes	No	No	high	>1 year	public	preventive	35	1	0	4
262	F	20	Yes	No	No	Young Adult (15-25)	3.39	Primary	No	Yes	No	No	high	<1 year	private	preventive	36	1	0	0
263	F	20	Yes	No	No	Young Adult (15-25)	5.2	Secondary	No	Yes	Yes	No	high	<1 year	private	curative	30	0	1	0
264	M	21	Yes	No	No	Young Adult (15-25)	3.51	Secondary	No	Yes	Yes	No	high	<1 year	private	curative	24	1	1	1
265	F	19	Yes	No	No	Young Adult (15-25)	3.1	Secondary	No	Yes	Yes	No	high	<1 year	private	curative	50	1	1	1
266	F	19	Yes	No	No	Young Adult (15-25)	4.48	None	Yes	No	No	No	high	<1 year	private	preventive	25	1	0	2
267	M	19	Yes	No	No	Young Adult (15-25)	4.11	Primary	No	Yes	No	No	high	<1 year	public	curative	14	1	1	1
268	F	20	Yes	No	No	Young Adult (15-25)	3.6	None	Yes	No	No	No	high	<1 year	private	preventive	24	1	1	2
269	F	23	Yes	No	No	Young Adult (15-25)	2.44	None	Yes	No	No	No	high	>1 year	public	preventive	3	0	1	4
270	M	23	Yes	No	No	Young Adult (15-25)	3.02	Primary	No	Yes	No	No	high	>1 year	public	curative	54	0	1	3
271	M	20	Yes	No	No	Young Adult (15-25)	2.37	Primary	No	Yes	No	No	high	>1 year	private	curative	70	1	1	4
272	M	20	Yes	No	No	Young Adult (15-25)	5.33	Primary	No	Yes	No	No	high	>1 year	private	curative	27	1	1	1
273	F	20	Yes	No	No	Young Adult (15-25)	4.41	Primary	No	Yes	No	No	high	>1 year	private	preventive	42	0	1	1
274	M	21	Yes	No	No	Young Adult (15-25)	2.52	Primary	No	Yes	No	No	high	>1 year	private	preventive	24	1	1	1
275	F	23	Yes	No	No	Young Adult (15-25)	4.76	Primary	No	Yes	No	No	high	<1 year	private	preventive	14	0	1	2
276	F	19	Yes	No	No	Young Adult (15-25)	2.49	None	Yes	No	No	No	high	<1 year	public	preventive	16	1	0	2
277	F	23	Yes	No	No	Young Adult (15-25)	2.59	None	Yes	No	No	No	high	<1 year	private	preventive	15	0	1	2
278	M	20	Yes	No	No	Young Adult (15-25)	4.9	None	Yes	No	No	No	high	<1 year	public	preventive	25	1	1	2
279	F	21	Yes	No	No	Young Adult (15-25)	6.3	None	Yes	No	No	No	high	<1 year	public	curative	32	0	1	4
280	F	19	Yes	No	No	Young Adult (15-25)	3.77	None	Yes	No	No	No	high	<1 year	private	curative	53	1	1	0
281	M	19	Yes	No	No	Young Adult (15-25)	3.78	Secondary	No	Yes	Yes	No	high	<1 year	private	curative	24	0	1	2
282	F	18	Yes	No	No	Young Adult (15-25)	5.13	Primary	No	Yes	No	No	high	>1 year	private	preventive	3	0	1	1
283	F	19	Yes	No	No	Young Adult (15-25)	6.01	None	Yes	No	No	No	high	>1 year	private	curative	35	1	1	2
284	M	20	Yes	No	No	Young Adult (15-25)	4.93	Primary	No	Yes	No	No	high	>1 year	private	preventive	21	0	1	2
285	M	20	Yes	No	No	Young Adult (15-25)	5.37	Primary	No	Yes	No	No	high	>1 year	public	preventive	22	0	1	3
286	M	21	Yes	No	No	Young Adult (15-25)	5.96	Secondary	No	Yes	Yes	No	high	>1 year	private	curative	23	0	1	2
287	F	20	Yes	No	No	Young Adult (15-25)	4.06	Secondary	No	Yes	Yes	No	high	>1 year	public	curative	33	0	1	3
288	M	23	Yes	No	No	Young Adult (15-25)	6.41	Secondary	No	Yes	Yes	No	high	<1 year	public	curative	62	0	1	0
289	F	22	Yes	No	No	Young Adult (15-25)	3.76	None	Yes	No	No	No	high	<1 year	private	preventive	27	0	1	2
290	F	22	Yes	No	No	Young Adult (15-25)	2.69	Primary	No	Yes	No	No	high	<1 year	private	preventive	2	1	1	0
291	F	21	Yes	No	No	Young Adult (15-25)	3.67	Graduate	No	No	No	Yes	high	<1 year	private	preventive	24	0	1	3
292	M	20	Yes	No	No	Young Adult (15-25)	3.59	Graduate	No	No	No	Yes	high	<1 year	private	preventive	24	0	1	0
293	F	20	Yes	No	No	Young Adult (15-25)	5.09	Graduate	No	No	No	Yes	high	<1 year	private	preventive	22	0	1	4
294	F	21	Yes	No	No	Young Adult (15-25)	4.54	Primary	No	Yes	No	No	high	<1 year	public	preventive	12	1	1	0
295	M	19	Yes	No	No	Young Adult (15-25)	3.16	Primary	No	Yes	No	No	high	>1 year	private	curative	18	0	1	0
296	F	19	Yes	No	No	Young Adult (15-25)	4.63	Secondary	No	Yes	Yes	No	high	>1 year	public	curative	14	0	1	1
297	F	19	Yes	No	No	Young Adult (15-25)	5.83	Secondary	No	Yes	Yes	No	high	>1 year	public	curative	15	1	1	1
298	M	20	Yes	No	No	Young Adult (15-25)	4.63	Secondary	No	Yes	Yes	No	high	>1 year	private	preventive	25	0	1	2
299	M	23	Yes	No	No	Young Adult (15-25)	2.3	None	Yes	No	No	No	high	>1 year	private	curative	28	0	1	1
300	M	23	Yes	No	No	Young Adult (15-25)	5.39	Primary	No	Yes	No	No	high	>1 year	private	preventive	29	0	1	2
301	F	20	Yes	No	No	Young Adult (15-25)	4.54	None	Yes	No	No	No	high	<1 year	private	preventive	32	1	1	4
302	M	20	Yes	No	No	Young Adult (15-25)	4.48	None	Yes	No	No	No	high	<1 year	private	curative	33	0	1	3
303	F	20	Yes	No	No	Young Adult (15-25)	6.26	Primary	No	Yes	No	No	high	<1 year	public	curative	34	1	1	4
304	F	21	Yes	No	No	Young Adult (15-25)	3.91	Primary	No	Yes	No	No	high	<1 year	private	curative	35	0	0	1
305	F	23	Yes	No	No	Young Adult (15-25)	3.63	Primary	No	Yes	No	No	high	<1 year	public	preventive	54	0	0	1
306	M	19	Yes	No	No	Young Adult (15-25)	6.02	Primary	No	Yes	No	No	high	>1 year	public	preventive	50	0	0	1
307	F	23	Yes	No	No	Young Adult (15-25)	3.35	Primary	No	Yes	No	No	high	>1 year	private	preventive	28	0	0	2
308	F	20	Yes	No	No	Young Adult (15-25)	3.14	Primary	No	Yes	No	No	high	>1 year	private	preventive	20	0	0	2
309	M	21	Yes	No	No	Young Adult (15-25)	2.63	None	Yes	No	No	No	high	>1 year	private	preventive	51	0	0	2
310	F	19	Yes	No	No	Young Adult (15-25)	5.59	None	Yes	No	No	No	high	>1 year	private	preventive	28	0	0	2
311	F	19	Yes	No	No	Young Adult (15-25)	2.32	None	Yes	No	No	No	high	>1 year	private	curative	31	0	0	4
312	M	18	Yes	No	No	Young Adult (15-25)	4.99	None	Yes	No	No	No	high	<1 year	public	curative	35	0	0	0
313	M	19	Yes	No	No	Young Adult (15-25)	3.56	None	Yes	No	No	No	high	<1 year	private	curative	36	0	0	2
314	M	20	Yes	No	No	Young Adult (15-25)	5.35	Secondary	No	Yes	Yes	No	high	<1 year	public	preventive	30	0	0	1
315	F	20	Yes	No	No	Young Adult (15-25)	5.77	Primary	No	Yes	No	No	high	<1 year	public	curative	24	0	0	2
316	M	21	Yes	No	No	Young Adult (15-25)	5.4	None	Yes	No	No	No	high	<1 year	private	preventive	50	0	0	2
317	F	20	Yes	No	No	Young Adult (15-25)	2.4	Primary	No	Yes	No	No	high	<1 year	private	preventive	25	0	0	3
318	F	23	Yes	No	No	Young Adult (15-25)	6.12	Primary	No	Yes	No	No	high	<1 year	private	curative	14	0	0	2
319	F	22	Yes	No	No	Young Adult (15-25)	4.97	Secondary	No	Yes	Yes	No	high	>1 year	private	curative	24	0	0	3
320	M	22	Yes	No	No	Young Adult (15-25)	6.01	Secondary	No	Yes	Yes	No	high	>1 year	private	curative	3	0	0	0
321	F	21	Yes	No	No	Young Adult (15-25)	2.5	Secondary	No	Yes	Yes	No	high	>1 year	public	preventive	54	1	0	2
322	F	20	Yes	No	No	Young Adult (15-25)	5.87	None	Yes	No	No	No	high	>1 year	private	preventive	70	1	0	0
323	M	20	Yes	No	No	Young Adult (15-25)	4.38	Primary	No	Yes	No	No	high	>1 year	public	preventive	27	0	0	3
324	F	21	Yes	No	No	Young Adult (15-25)	3.16	Graduate	No	No	No	Yes	high	>1 year	public	preventive	42	1	1	0
325	F	19	Yes	No	No	Young Adult (15-25)	4.83	Graduate	No	No	No	Yes	high	<1 year	private	preventive	24	1	1	4
326	M	19	Yes	No	No	Young Adult (15-25)	5.62	Graduate	No	No	No	Yes	high	<1 year	private	preventive	14	1	0	0
327	M	19	Yes	No	No	Young Adult (15-25)	4.44	Primary	No	Yes	No	No	high	<1 year	private	curative	16	0	0	0
328	M	20	Yes	No	No	Young Adult (15-25)	6.28	Primary	No	Yes	No	No	high	<1 year	private	curative	15	1	1	1
329	F	23	Yes	No	No	Young Adult (15-25)	5.64	Secondary	No	Yes	Yes	No	high	<1 year	private	curative	25	1	1	1
330	M	23	Yes	No	No	Young Adult (15-25)	3.36	Secondary	No	Yes	Yes	No	high	<1 year	public	preventive	32	0	0	2
331	F	20	Yes	No	No	Young Adult (15-25)	3.61	Secondary	No	Yes	Yes	No	high	<1 year	private	curative	53	1	1	1
332	F	20	Yes	No	No	Young Adult (15-25)	2.98	None	Yes	No	No	No	high	>1 year	public	preventive	24	1	1	2
333	F	20	Yes	No	No	Young Adult (15-25)	3.47	Primary	No	Yes	No	No	high	>1 year	public	preventive	3	1	0	4
334	M	21	Yes	No	No	Young Adult (15-25)	5.07	None	Yes	No	No	No	high	>1 year	private	curative	35	0	1	3
335	F	23	Yes	No	No	Young Adult (15-25)	5.97	None	Yes	No	No	No	high	>1 year	private	curative	21	1	1	4
336	F	19	Yes	No	No	Young Adult (15-25)	5.99	Primary	No	Yes	No	No	high	>1 year	private	curative	22	1	1	1
337	M	23	Yes	No	No	Young Adult (15-25)	5.27	Primary	No	Yes	No	No	high	>1 year	private	preventive	23	1	0	1
338	F	20	Yes	No	No	Young Adult (15-25)	4.1	Primary	No	Yes	No	No	high	<1 year	private	preventive	33	0	0	1
339	F	21	Yes	No	No	Young Adult (15-25)	3.57	Primary	No	Yes	No	No	high	<1 year	public	preventive	62	1	1	2
340	M	19	Yes	No	No	Young Adult (15-25)	4.79	Primary	No	Yes	No	No	high	<1 year	private	preventive	27	1	0	2
341	M	19	Yes	No	No	Young Adult (15-25)	5.29	Primary	No	Yes	No	No	high	<1 year	public	preventive	2	1	0	4
342	M	18	Yes	No	No	Young Adult (15-25)	2.59	None	Yes	No	No	No	high	<1 year	public	preventive	24	0	1	3
343	F	19	Yes	No	No	Young Adult (15-25)	4.05	None	Yes	No	No	No	high	<1 year	private	curative	24	1	1	4
344	M	20	Yes	No	No	Young Adult (15-25)	6.33	None	Yes	No	No	No	high	<1 year	private	curative	22	1	1	1
345	F	20	Yes	No	No	Young Adult (15-25)	4.96	None	Yes	No	No	No	high	>1 year	private	curative	12	1	0	1
346	F	21	Yes	No	No	Young Adult (15-25)	6.53	None	Yes	No	No	No	high	>1 year	private	preventive	18	0	0	1
347	F	20	Yes	No	No	Young Adult (15-25)	3.97	Secondary	No	Yes	Yes	No	high	>1 year	private	curative	14	0	1	2
348	M	23	Yes	No	No	Young Adult (15-25)	6.11	Primary	No	Yes	No	No	high	>1 year	public	preventive	15	1	1	2
349	F	22	Yes	No	No	Young Adult (15-25)	5.08	None	Yes	No	No	No	high	>1 year	private	preventive	25	1	0	2
350	F	22	Yes	No	No	Young Adult (15-25)	3.27	Primary	No	Yes	No	No	high	>1 year	public	curative	28	1	1	2
351	M	21	Yes	No	No	Young Adult (15-25)	5.31	Primary	No	Yes	No	No	high	<1 year	public	curative	29	1	1	4
352	F	20	Yes	No	No	Young Adult (15-25)	6.16	Secondary	No	Yes	Yes	No	high	<1 year	private	curative	32	0	0	0
353	F	20	Yes	No	No	Young Adult (15-25)	2.65	Secondary	No	Yes	Yes	No	high	<1 year	private	preventive	33	0	1	2
354	M	21	Yes	No	No	Young Adult (15-25)	5.23	Secondary	No	Yes	Yes	No	high	<1 year	private	preventive	34	1	1	1
355	M	19	Yes	No	No	Young Adult (15-25)	4.4	None	Yes	No	No	No	high	<1 year	private	preventive	35	1	1	2
356	M	19	Yes	No	No	Young Adult (15-25)	4.24	Primary	No	Yes	No	No	high	<1 year	private	preventive	54	0	1	2
357	F	19	Yes	No	No	Young Adult (15-25)	2.48	Graduate	No	No	No	Yes	high	<1 year	public	preventive	50	0	1	3
358	M	20	Yes	No	No	Young Adult (15-25)	4.61	Graduate	No	No	No	Yes	high	>1 year	private	preventive	28	1	0	2
359	F	23	Yes	No	No	Young Adult (15-25)	3.93	Graduate	No	No	No	Yes	high	>1 year	public	curative	20	0	0	3
360	F	23	Yes	No	No	Young Adult (15-25)	5.59	Primary	No	Yes	No	No	high	>1 year	public	curative	51	1	1	0
361	F	20	Yes	No	No	Young Adult (15-25)	3	Primary	No	Yes	No	No	high	>1 year	private	curative	28	0	1	2
362	M	20	Yes	No	No	Young Adult (15-25)	4.45	Secondary	No	Yes	Yes	No	high	>1 year	private	preventive	31	1	0	0
363	F	20	Yes	No	No	Young Adult (15-25)	6.38	Secondary	No	Yes	Yes	No	high	>1 year	private	curative	35	1	0	3
364	F	21	Yes	No	No	Young Adult (15-25)	3.63	Secondary	No	Yes	Yes	No	high	<1 year	private	preventive	36	0	1	0
365	M	23	Yes	No	No	Young Adult (15-25)	4.49	None	Yes	No	No	No	high	<1 year	private	preventive	30	1	1	4
366	F	19	Yes	No	No	Young Adult (15-25)	4.48	Primary	No	Yes	No	No	high	<1 year	public	curative	24	1	1	0
367	F	23	Yes	No	No	Young Adult (15-25)	5.28	None	Yes	No	No	No	high	<1 year	private	curative	50	1	0	0
368	M	20	Yes	No	No	Young Adult (15-25)	3.43	None	Yes	No	No	No	high	<1 year	public	curative	25	1	1	1
369	M	21	Yes	No	No	Young Adult (15-25)	2.82	Primary	No	Yes	No	No	high	<1 year	public	preventive	14	1	1	1
370	M	19	Yes	No	No	Young Adult (15-25)	5.93	Primary	No	Yes	No	No	high	<1 year	private	preventive	24	0	1	2
371	F	19	Yes	No	No	Young Adult (15-25)	5.48	Primary	No	Yes	No	No	high	>1 year	private	preventive	3	0	1	1
372	M	18	Yes	No	No	Young Adult (15-25)	5.54	Primary	No	Yes	No	No	high	>1 year	private	preventive	54	1	1	2
373	F	19	Yes	No	No	Young Adult (15-25)	5.62	Primary	No	Yes	No	No	high	>1 year	private	preventive	70	1	1	4
374	F	20	Yes	No	No	Young Adult (15-25)	4.54	Primary	No	Yes	No	No	high	>1 year	private	preventive	27	0	1	3
375	F	20	Yes	No	No	Young Adult (15-25)	4.67	None	Yes	No	No	No	high	>1 year	public	curative	42	1	1	4
376	M	21	Yes	No	No	Young Adult (15-25)	3.06	None	Yes	No	No	No	high	>1 year	private	curative	24	0	1	1
377	F	20	Yes	No	No	Young Adult (15-25)	5.46	None	Yes	No	No	No	high	<1 year	public	curative	14	1	0	1
378	F	23	Yes	No	No	Young Adult (15-25)	4.34	None	Yes	No	No	No	high	<1 year	public	preventive	16	0	1	1
379	M	22	Yes	No	No	Young Adult (15-25)	2.49	None	Yes	No	No	No	high	<1 year	private	curative	15	1	1	2
380	F	22	Yes	No	No	Young Adult (15-25)	2.8	Secondary	No	Yes	Yes	No	high	<1 year	private	preventive	25	0	1	2
381	F	21	Yes	No	No	Young Adult (15-25)	2.95	Primary	No	Yes	No	No	high	<1 year	private	preventive	32	1	1	2
382	M	20	Yes	No	No	Young Adult (15-25)	2.4	None	Yes	No	No	No	high	>1 year	private	curative	53	0	1	2
383	M	20	Yes	No	No	Young Adult (15-25)	4.26	Primary	No	Yes	No	No	high	>1 year	private	curative	24	0	1	4
384	M	21	Yes	No	No	Young Adult (15-25)	3.43	Primary	No	Yes	No	No	high	>1 year	public	curative	3	1	1	0
385	F	19	Yes	No	No	Young Adult (15-25)	2.44	Secondary	No	Yes	Yes	No	high	>1 year	private	preventive	35	0	1	2
386	M	19	Yes	No	No	Young Adult (15-25)	5.66	Secondary	No	Yes	Yes	No	high	>1 year	public	preventive	21	0	1	1
387	F	19	Yes	No	No	Young Adult (15-25)	4.31	Secondary	No	Yes	Yes	No	low	>1 year	public	preventive	22	0	1	2
388	F	20	Yes	No	No	Young Adult (15-25)	5.08	None	Yes	No	No	No	low	<1 year	private	preventive	23	0	1	2
389	F	23	Yes	No	No	Young Adult (15-25)	3.07	Primary	No	Yes	No	No	low	<1 year	private	preventive	33	0	1	3
390	M	23	Yes	No	No	Young Adult (15-25)	6.06	Graduate	No	No	No	Yes	low	<1 year	private	preventive	62	0	1	2
391	F	20	Yes	No	No	Young Adult (15-25)	2.65	Graduate	No	No	No	Yes	low	<1 year	private	curative	27	1	1	3
392	F	20	Yes	No	No	Young Adult (15-25)	5.46	Graduate	No	No	No	Yes	low	<1 year	private	curative	2	0	1	0
393	M	20	Yes	No	No	Young Adult (15-25)	5.19	Primary	No	Yes	No	No	low	<1 year	public	curative	24	0	1	2
394	F	21	Yes	No	No	Young Adult (15-25)	3.32	Primary	No	Yes	No	No	low	<1 year	private	preventive	24	0	1	0
395	F	23	Yes	No	No	Young Adult (15-25)	6.08	Secondary	No	Yes	Yes	No	low	>1 year	public	curative	22	1	1	3
396	M	19	Yes	No	No	Young Adult (15-25)	2.35	Secondary	No	Yes	Yes	No	low	>1 year	public	preventive	12	0	1	0
397	M	23	Yes	No	No	Young Adult (15-25)	2.53	Secondary	No	Yes	Yes	No	low	>1 year	private	preventive	18	0	1	4
398	M	20	Yes	No	No	Young Adult (15-25)	5.21	None	Yes	No	No	No	low	>1 year	private	curative	14	1	1	0
399	F	21	Yes	No	No	Young Adult (15-25)	3.86	Primary	No	Yes	No	No	low	>1 year	private	curative	15	0	1	0
400	M	19	Yes	No	No	Young Adult (15-25)	5.77	None	Yes	No	No	No	low	>1 year	private	curative	25	0	1	1
401	F	19	Yes	No	No	Young Adult (15-25)	2.95	None	Yes	No	No	No	low	<1 year	private	preventive	28	0	1	1
402	F	18	Yes	No	No	Young Adult (15-25)	3.53	Primary	No	Yes	No	No	low	<1 year	public	preventive	29	1	1	2
403	F	19	Yes	No	No	Young Adult (15-25)	5.15	Primary	No	Yes	No	No	low	<1 year	private	preventive	32	0	1	1
404	M	20	Yes	No	No	Young Adult (15-25)	6.1	Primary	No	Yes	No	No	low	<1 year	public	preventive	33	1	1	2
405	F	20	Yes	No	No	Young Adult (15-25)	6.35	Primary	No	Yes	No	No	low	<1 year	public	preventive	34	0	0	4
406	F	21	Yes	No	No	Young Adult (15-25)	5	Primary	No	Yes	No	No	low	<1 year	private	preventive	35	0	0	3
407	M	20	Yes	No	No	Young Adult (15-25)	5.43	Primary	No	Yes	No	No	low	<1 year	private	curative	54	0	0	4
408	F	23	Yes	No	No	Young Adult (15-25)	5.43	None	Yes	No	No	No	low	>1 year	private	curative	50	0	0	1
409	F	22	Yes	No	No	Young Adult (15-25)	2.69	None	Yes	No	No	No	low	>1 year	private	curative	28	0	0	1
410	M	22	Yes	No	No	Young Adult (15-25)	6.25	None	Yes	No	No	No	low	>1 year	private	preventive	20	0	0	1
411	M	21	Yes	No	No	Young Adult (15-25)	2.69	None	Yes	No	No	No	low	>1 year	public	curative	51	0	0	2
412	M	20	Yes	No	No	Young Adult (15-25)	4.72	None	Yes	No	No	No	low	>1 year	private	preventive	28	0	0	2
413	F	20	Yes	No	No	Young Adult (15-25)	2.8	Secondary	No	Yes	Yes	No	low	>1 year	public	preventive	31	0	0	2
414	M	21	Yes	No	No	Young Adult (15-25)	4.47	Primary	No	Yes	No	No	low	<1 year	public	curative	35	0	0	2
415	F	19	Yes	No	No	Young Adult (15-25)	5.2	None	Yes	No	No	No	low	<1 year	private	curative	36	0	0	4
416	F	19	Yes	No	No	Young Adult (15-25)	5.21	Primary	No	Yes	No	No	low	<1 year	private	curative	30	0	0	0
417	F	19	Yes	No	No	Young Adult (15-25)	4.67	Primary	No	Yes	No	No	low	<1 year	private	preventive	24	0	0	2
418	M	20	Yes	No	No	Young Adult (15-25)	5.22	Secondary	No	Yes	Yes	No	low	<1 year	private	preventive	50	0	0	1
419	F	23	Yes	No	No	Young Adult (15-25)	5.39	Secondary	No	Yes	Yes	No	low	<1 year	private	preventive	25	0	0	2
420	F	23	Yes	No	No	Young Adult (15-25)	4.46	Secondary	No	Yes	Yes	No	low	<1 year	public	preventive	14	0	0	2
421	M	20	Yes	No	No	Young Adult (15-25)	6.31	None	Yes	No	No	No	low	>1 year	private	preventive	24	0	0	3
422	F	20	Yes	No	No	Young Adult (15-25)	4.51	Primary	No	Yes	No	No	low	>1 year	public	preventive	3	1	0	2
423	F	20	Yes	No	No	Young Adult (15-25)	4.97	Graduate	No	No	No	Yes	low	>1 year	public	curative	54	1	0	3
424	M	21	Yes	No	No	Young Adult (15-25)	4.85	Graduate	No	No	No	Yes	low	>1 year	private	curative	70	0	0	0
425	M	23	Yes	No	No	Young Adult (15-25)	5.68	Graduate	No	No	No	Yes	low	>1 year	private	curative	27	1	1	2
426	M	19	Yes	No	No	Young Adult (15-25)	3.59	Primary	No	Yes	No	No	low	>1 year	private	preventive	42	1	1	0
427	F	23	Yes	No	No	Young Adult (15-25)	3.88	Primary	No	Yes	No	No	low	<1 year	private	curative	24	1	0	3
428	M	20	Yes	No	No	Young Adult (15-25)	5.87	Secondary	No	Yes	Yes	No	low	<1 year	private	preventive	14	0	0	0
429	F	21	Yes	No	No	Young Adult (15-25)	5.72	Secondary	No	Yes	Yes	No	low	<1 year	public	preventive	16	1	1	4
430	F	19	Yes	No	No	Young Adult (15-25)	4.53	Secondary	No	Yes	Yes	No	low	<1 year	private	curative	15	1	1	0
431	F	19	Yes	No	No	Young Adult (15-25)	6.23	None	Yes	No	No	No	low	<1 year	public	curative	25	0	0	0
432	M	18	Yes	No	No	Young Adult (15-25)	2.91	Primary	No	Yes	No	No	low	<1 year	public	curative	32	1	1	1
433	F	19	Yes	No	No	Young Adult (15-25)	3.47	None	Yes	No	No	No	low	<1 year	private	preventive	53	1	1	1
434	F	20	Yes	No	No	Young Adult (15-25)	4.25	None	Yes	No	No	No	low	>1 year	private	preventive	24	1	0	2
435	M	20	Yes	No	No	Young Adult (15-25)	5.04	Primary	No	Yes	No	No	low	>1 year	private	preventive	3	0	1	1
436	F	21	Yes	No	No	Young Adult (15-25)	5.81	Primary	No	Yes	No	No	low	>1 year	private	preventive	35	1	1	2
437	F	20	Yes	No	No	Young Adult (15-25)	4.94	Primary	No	Yes	No	No	low	>1 year	private	preventive	21	1	1	4
438	M	23	Yes	No	No	Young Adult (15-25)	6.45	Primary	No	Yes	No	No	low	>1 year	public	preventive	22	1	0	3
439	M	22	Yes	No	No	Young Adult (15-25)	2.72	Primary	No	Yes	No	No	low	>1 year	private	curative	23	0	0	4
440	M	22	Yes	No	No	Young Adult (15-25)	3.11	Primary	No	Yes	No	No	low	<1 year	public	curative	33	1	1	1
441	F	21	Yes	No	No	Young Adult (15-25)	4.78	None	Yes	No	No	No	low	<1 year	public	curative	62	1	0	1
442	M	20	Yes	No	No	Young Adult (15-25)	2.79	None	Yes	No	No	No	low	<1 year	private	preventive	27	1	0	1
443	F	20	Yes	No	No	Young Adult (15-25)	4.78	None	Yes	No	No	No	low	<1 year	private	curative	2	0	1	2
444	F	21	Yes	No	No	Young Adult (15-25)	2.63	None	Yes	No	No	No	low	<1 year	private	preventive	24	1	1	2
445	F	19	Yes	No	No	Young Adult (15-25)	2.87	None	Yes	No	No	No	low	<1 year	private	preventive	24	1	1	4
446	M	19	Yes	No	No	Young Adult (15-25)	3.03	Secondary	No	Yes	Yes	No	low	<1 year	private	curative	22	1	0	3
447	F	19	Yes	No	No	Young Adult (15-25)	3.14	Primary	No	Yes	No	No	low	>1 year	public	curative	12	0	0	4
448	F	20	Yes	No	No	Young Adult (15-25)	5.34	None	Yes	No	No	No	low	>1 year	private	curative	18	0	1	1
449	M	23	Yes	No	No	Young Adult (15-25)	6.04	Primary	No	Yes	No	No	low	>1 year	public	preventive	14	1	1	1
450	F	23	Yes	No	No	Young Adult (15-25)	2.9	Primary	No	Yes	No	No	low	>1 year	public	preventive	15	1	0	1
451	F	20	Yes	No	No	Young Adult (15-25)	4.25	Secondary	No	Yes	Yes	No	low	>1 year	private	preventive	25	1	1	2
452	M	20	Yes	No	No	Young Adult (15-25)	4.99	Secondary	No	Yes	Yes	No	low	>1 year	private	preventive	28	1	1	2
453	M	20	Yes	No	No	Young Adult (15-25)	3.55	Secondary	No	Yes	Yes	No	low	<1 year	private	preventive	29	0	0	2
454	M	21	Yes	No	No	Young Adult (15-25)	5.28	None	Yes	No	No	No	low	<1 year	private	preventive	32	0	1	2
455	F	23	Yes	No	No	Young Adult (15-25)	4.76	Primary	No	Yes	No	No	low	<1 year	private	curative	33	1	1	4
456	M	19	Yes	No	No	Young Adult (15-25)	3.06	Graduate	No	No	No	Yes	low	<1 year	public	curative	34	1	1	0
457	F	23	Yes	No	No	Young Adult (15-25)	3.8	Graduate	No	No	No	Yes	low	<1 year	private	curative	35	0	1	2
458	F	20	Yes	No	No	Young Adult (15-25)	3.28	Graduate	No	No	No	Yes	low	>1 year	public	preventive	54	0	1	1
459	F	21	Yes	No	No	Young Adult (15-25)	3.45	Primary	No	Yes	No	No	low	>1 year	public	curative	50	1	0	2
460	M	19	Yes	No	No	Young Adult (15-25)	4.67	Primary	No	Yes	No	No	low	>1 year	private	preventive	28	0	0	2
461	F	19	Yes	No	No	Young Adult (15-25)	6.21	Secondary	No	Yes	Yes	No	low	>1 year	private	preventive	20	1	1	3
462	F	18	Yes	No	No	Young Adult (15-25)	4.56	Secondary	No	Yes	Yes	No	low	>1 year	private	curative	51	0	1	2
463	M	19	Yes	No	No	Young Adult (15-25)	2.52	Secondary	No	Yes	Yes	No	low	>1 year	private	curative	28	1	0	3
464	F	20	Yes	No	No	Young Adult (15-25)	5.45	None	Yes	No	No	No	low	<1 year	private	curative	31	1	0	0
465	F	20	Yes	No	No	Young Adult (15-25)	5.57	Primary	No	Yes	No	No	low	<1 year	public	preventive	35	0	1	2
466	M	21	Yes	No	No	Young Adult (15-25)	5.39	None	Yes	No	No	No	low	<1 year	private	preventive	36	1	1	0
467	M	20	Yes	No	No	Young Adult (15-25)	5.69	None	Yes	No	No	No	low	<1 year	public	preventive	30	1	1	3
468	M	23	Yes	No	No	Young Adult (15-25)	5.02	Primary	No	Yes	No	No	low	<1 year	public	preventive	24	1	0	0
469	F	22	Yes	No	No	Young Adult (15-25)	2.63	Primary	No	Yes	No	No	low	<1 year	private	preventive	50	1	1	4
470	M	22	Yes	No	No	Young Adult (15-25)	3.81	Primary	No	Yes	No	No	low	<1 year	private	preventive	25	1	1	0
471	F	21	Yes	No	No	Young Adult (15-25)	6.28	Primary	No	Yes	No	No	low	>1 year	private	curative	14	0	1	0
472	F	20	Yes	No	No	Young Adult (15-25)	6.12	Primary	No	Yes	No	No	low	>1 year	private	curative	24	0	1	1
473	F	20	Yes	No	No	Young Adult (15-25)	5.11	Primary	No	Yes	No	No	low	>1 year	private	curative	3	1	1	1
474	M	21	Yes	No	No	Young Adult (15-25)	3.02	None	Yes	No	No	No	low	>1 year	public	preventive	54	1	1	2
475	F	19	Yes	No	No	Young Adult (15-25)	3.45	None	Yes	No	No	No	low	>1 year	private	curative	70	0	1	1
476	F	19	Yes	No	No	Young Adult (15-25)	2.48	None	Yes	No	No	No	low	>1 year	public	preventive	27	1	1	2
477	M	19	Yes	No	No	Young Adult (15-25)	5.81	None	Yes	No	No	No	low	<1 year	public	preventive	42	0	1	4
478	F	20	Yes	No	No	Young Adult (15-25)	4.22	None	Yes	No	No	No	low	<1 year	private	curative	24	1	0	3
479	F	23	Yes	No	No	Young Adult (15-25)	5.9	Secondary	No	Yes	Yes	No	low	<1 year	private	curative	14	0	1	4
480	M	23	Yes	No	No	Young Adult (15-25)	3.28	Primary	No	Yes	No	No	low	<1 year	private	curative	16	1	1	1
481	M	20	Yes	No	No	Young Adult (15-25)	4.94	None	Yes	No	No	No	low	<1 year	private	preventive	15	0	1	1
482	M	20	Yes	No	No	Young Adult (15-25)	2.94	Primary	No	Yes	No	No	low	<1 year	private	preventive	25	1	1	1
483	F	20	Yes	No	No	Young Adult (15-25)	3.1	Primary	No	Yes	No	No	low	<1 year	public	preventive	32	0	1	2
484	M	21	Yes	No	No	Young Adult (15-25)	6.56	Secondary	No	Yes	Yes	No	low	>1 year	private	preventive	53	0	1	2
485	F	23	Yes	No	No	Young Adult (15-25)	4.96	Secondary	No	Yes	Yes	No	low	>1 year	public	preventive	24	1	1	2
486	F	19	Yes	No	No	Young Adult (15-25)	4.17	Secondary	No	Yes	Yes	No	low	>1 year	public	preventive	3	0	1	2
487	F	23	Yes	No	No	Young Adult (15-25)	2.88	None	Yes	No	No	No	low	>1 year	private	curative	35	0	1	4
488	M	20	Yes	No	No	Young Adult (15-25)	3.55	Primary	No	Yes	No	No	low	>1 year	private	curative	21	0	1	0
489	F	21	Yes	No	No	Young Adult (15-25)	3.66	Graduate	No	No	No	Yes	low	>1 year	private	curative	22	0	1	2
490	F	19	Yes	No	No	Young Adult (15-25)	2.95	Graduate	No	No	No	Yes	low	<1 year	private	preventive	23	0	1	1
491	M	19	Yes	No	No	Young Adult (15-25)	6.41	Graduate	No	No	No	Yes	low	<1 year	private	curative	33	0	1	2
492	F	18	Yes	No	No	Young Adult (15-25)	4.61	Primary	No	Yes	No	No	low	<1 year	public	preventive	62	1	1	2
493	F	19	Yes	No	No	Young Adult (15-25)	4.48	Primary	No	Yes	No	No	low	<1 year	private	preventive	27	0	1	3
494	M	20	Yes	No	No	Young Adult (15-25)	3	Secondary	No	Yes	Yes	No	low	<1 year	public	curative	2	0	1	2
495	M	20	Yes	No	No	Young Adult (15-25)	2.68	Secondary	No	Yes	Yes	No	low	<1 year	public	curative	24	0	1	1
496	M	21	Yes	No	No	Young Adult (15-25)	4.29	Secondary	No	Yes	Yes	No	low	<1 year	private	curative	24	1	1	2
497	F	20	Yes	No	No	Young Adult (15-25)	4.68	None	Yes	No	No	No	low	>1 year	private	preventive	22	0	1	2
498	M	23	Yes	No	No	Young Adult (15-25)	3.82	Primary	No	Yes	No	No	low	>1 year	private	preventive	12	0	1	3
499	F	22	Yes	No	No	Young Adult (15-25)	5.25	None	Yes	No	No	No	low	>1 year	private	preventive	18	1	1	2
500	F	22	Yes	No	No	Young Adult (15-25)	5.97	None	Yes	No	No	No	low	>1 year	private	preventive	14	0	1	3
501	F	21	Yes	No	No	Young Adult (15-25)	6.56	Primary	No	Yes	No	No	low	>1 year	public	preventive	15	0	1	0
502	M	20	Yes	No	No	Young Adult (15-25)	6.09	Primary	No	Yes	No	No	low	>1 year	private	preventive	25	0	1	2
503	F	20	Yes	No	No	Young Adult (15-25)	6.32	Primary	No	Yes	No	No	low	<1 year	public	curative	28	1	1	0
504	F	21	Yes	No	No	Young Adult (15-25)	4.9	Primary	No	Yes	No	No	low	<1 year	public	curative	29	0	1	3
505	M	19	Yes	No	No	Young Adult (15-25)	5.86	Primary	No	Yes	No	No	low	<1 year	private	curative	32	1	1	0
506	F	19	Yes	No	No	Young Adult (15-25)	6.48	Primary	No	Yes	No	No	low	<1 year	private	preventive	33	0	0	4
507	F	19	Yes	No	No	Young Adult (15-25)	2.91	None	Yes	No	No	No	low	<1 year	private	curative	34	0	0	0
508	M	20	Yes	No	No	Young Adult (15-25)	5.5	None	Yes	No	No	No	low	<1 year	private	preventive	35	0	0	0
509	M	23	Yes	No	No	Young Adult (15-25)	6.26	None	Yes	No	No	No	low	<1 year	private	preventive	54	0	0	1
510	M	23	Yes	No	No	Young Adult (15-25)	6.52	None	Yes	No	No	No	low	>1 year	public	curative	50	0	0	1
511	F	20	Yes	No	No	Young Adult (15-25)	5.67	None	Yes	No	No	No	low	>1 year	private	curative	28	0	0	2
512	M	20	Yes	No	No	Young Adult (15-25)	6.21	Secondary	No	Yes	Yes	No	low	>1 year	public	curative	20	0	0	1
513	F	20	Yes	No	No	Young Adult (15-25)	5.94	Primary	No	Yes	No	No	low	>1 year	public	preventive	51	0	0	2
514	F	21	Yes	No	No	Young Adult (15-25)	6.52	None	Yes	No	No	No	low	>1 year	private	preventive	28	0	0	4
515	F	23	Yes	No	No	Young Adult (15-25)	5.39	Primary	No	Yes	No	No	low	>1 year	private	preventive	31	0	0	3
516	M	19	Yes	No	No	Young Adult (15-25)	3.35	Primary	No	Yes	No	No	low	<1 year	private	preventive	35	0	0	4
517	F	23	Yes	No	No	Young Adult (15-25)	6.06	Secondary	No	Yes	Yes	No	low	<1 year	private	preventive	36	0	0	1
518	F	20	Yes	No	No	Young Adult (15-25)	6.04	Secondary	No	Yes	Yes	No	low	<1 year	private	preventive	30	0	0	1
519	M	21	Yes	No	No	Young Adult (15-25)	4.77	Secondary	No	Yes	Yes	No	low	<1 year	public	curative	24	0	0	1
520	F	19	Yes	No	No	Young Adult (15-25)	5.44	None	Yes	No	No	No	low	<1 year	private	curative	50	0	0	2
521	F	19	Yes	No	No	Young Adult (15-25)	5.63	Primary	No	Yes	No	No	low	<1 year	public	curative	25	0	0	2
522	M	18	Yes	No	No	Young Adult (15-25)	2.94	Graduate	No	No	No	Yes	low	<1 year	public	preventive	14	0	0	4
523	M	19	Yes	No	No	Young Adult (15-25)	5.64	Graduate	No	No	No	Yes	low	>1 year	private	curative	24	1	0	3
524	M	20	Yes	No	No	Young Adult (15-25)	2.63	Graduate	No	No	No	Yes	low	>1 year	private	preventive	3	1	0	4
525	F	20	Yes	No	No	Young Adult (15-25)	4.32	Primary	No	Yes	No	No	low	>1 year	private	preventive	54	0	0	1
526	M	21	Yes	No	No	Young Adult (15-25)	6.34	Primary	No	Yes	No	No	low	>1 year	private	curative	70	1	1	1
527	F	20	Yes	No	No	Young Adult (15-25)	4.51	Secondary	No	Yes	Yes	No	low	>1 year	private	curative	27	1	1	1
528	F	23	Yes	No	No	Young Adult (15-25)	4.29	Secondary	No	Yes	Yes	No	low	>1 year	public	curative	42	1	0	2
529	F	22	Yes	No	No	Young Adult (15-25)	3.96	Secondary	No	Yes	Yes	No	low	<1 year	private	preventive	24	0	0	2
530	M	22	Yes	No	No	Young Adult (15-25)	2.97	None	Yes	No	No	No	low	<1 year	public	preventive	14	1	1	2
531	F	21	Yes	No	No	Young Adult (15-25)	5.67	Primary	No	Yes	No	No	low	<1 year	public	preventive	16	1	1	2
532	F	20	Yes	No	No	Young Adult (15-25)	2.52	None	Yes	No	No	No	low	<1 year	private	preventive	15	0	0	4
533	M	20	Yes	No	No	Young Adult (15-25)	2.29	None	Yes	No	No	No	low	<1 year	private	preventive	25	1	1	0
534	F	21	Yes	No	No	Young Adult (15-25)	4.08	Primary	No	Yes	No	No	low	>1 year	private	preventive	32	1	1	2
535	F	19	Yes	No	No	Young Adult (15-25)	5.57	Primary	No	Yes	No	No	low	>1 year	private	curative	53	1	0	1
536	M	19	Yes	No	No	Young Adult (15-25)	5.09	Primary	No	Yes	No	No	low	>1 year	private	curative	24	0	1	2
537	M	19	Yes	No	No	Young Adult (15-25)	3.9	Primary	No	Yes	No	No	low	>1 year	public	curative	3	1	1	2
538	M	20	Yes	No	No	Young Adult (15-25)	3.38	Primary	No	Yes	No	No	low	>1 year	private	preventive	35	1	1	3
539	F	23	Yes	No	No	Young Adult (15-25)	5.02	Primary	No	Yes	No	No	low	>1 year	public	curative	21	1	0	2
540	M	23	Yes	No	No	Young Adult (15-25)	5.22	None	Yes	No	No	No	low	<1 year	public	preventive	22	0	0	3
541	F	20	Yes	No	No	Young Adult (15-25)	2.71	None	Yes	No	No	No	low	<1 year	private	preventive	23	1	1	0
542	F	20	Yes	No	No	Young Adult (15-25)	3.1	None	Yes	No	No	No	low	<1 year	private	curative	33	1	0	2
543	F	20	Yes	No	No	Young Adult (15-25)	6.26	None	Yes	No	No	No	low	<1 year	private	curative	62	1	0	0
544	M	21	Yes	No	No	Young Adult (15-25)	5.8	None	Yes	No	No	No	low	<1 year	private	curative	27	0	1	3
545	F	23	Yes	No	No	Young Adult (15-25)	4.69	Secondary	No	Yes	Yes	No	low	<1 year	private	preventive	2	1	1	0
546	F	19	Yes	No	No	Young Adult (15-25)	4.18	Primary	No	Yes	No	No	low	<1 year	public	preventive	24	1	1	4
547	M	23	Yes	No	No	Young Adult (15-25)	4.18	None	Yes	No	No	No	low	>1 year	private	preventive	24	1	0	0
548	F	20	Yes	No	No	Young Adult (15-25)	2.7	Primary	No	Yes	No	No	low	>1 year	public	preventive	22	0	0	0
549	F	21	Yes	No	No	Young Adult (15-25)	6.03	Primary	No	Yes	No	No	low	>1 year	public	preventive	12	0	1	1
550	M	19	Yes	No	No	Young Adult (15-25)	4.75	Secondary	No	Yes	Yes	No	low	>1 year	private	preventive	18	1	1	1
551	M	19	Yes	No	No	Young Adult (15-25)	6.23	Secondary	No	Yes	Yes	No	low	>1 year	private	curative	14	1	0	2
552	M	18	Yes	No	No	Young Adult (15-25)	3.9	Secondary	No	Yes	Yes	No	low	>1 year	private	curative	15	1	1	1
553	F	19	Yes	No	No	Young Adult (15-25)	2.65	None	Yes	No	No	No	low	<1 year	private	curative	25	1	1	2
554	M	20	Yes	No	No	Young Adult (15-25)	4.77	Primary	No	Yes	No	No	low	<1 year	private	preventive	28	0	0	4
555	F	20	Yes	No	No	Young Adult (15-25)	4.6	Graduate	No	No	No	Yes	low	<1 year	public	curative	29	0	1	3
556	F	21	Yes	No	No	Young Adult (15-25)	5.8	Graduate	No	No	No	Yes	low	<1 year	private	preventive	32	1	1	4
557	F	20	Yes	No	No	Young Adult (15-25)	5.49	Graduate	No	No	No	Yes	low	<1 year	public	preventive	33	1	1	1
558	M	23	Yes	No	No	Young Adult (15-25)	2.44	Primary	No	Yes	No	No	low	<1 year	public	curative	34	0	1	1
559	F	22	Yes	No	No	Young Adult (15-25)	4.71	Primary	No	Yes	No	No	low	<1 year	private	curative	35	0	1	1
560	F	22	Yes	No	No	Young Adult (15-25)	4.82	Secondary	No	Yes	Yes	No	low	>1 year	private	curative	54	1	0	2
561	M	21	Yes	No	No	Young Adult (15-25)	4.55	Secondary	No	Yes	Yes	No	low	>1 year	private	preventive	50	0	0	2
562	F	20	Yes	No	No	Young Adult (15-25)	6.03	Secondary	No	Yes	Yes	No	low	>1 year	private	preventive	28	1	1	2
563	F	20	Yes	No	No	Young Adult (15-25)	3.64	None	Yes	No	No	No	low	>1 year	private	preventive	20	0	1	2
564	M	21	Yes	No	No	Young Adult (15-25)	4.31	Primary	No	Yes	No	No	low	>1 year	public	preventive	51	1	0	4
565	M	19	Yes	No	No	Young Adult (15-25)	2.53	None	Yes	No	No	No	low	>1 year	private	preventive	28	1	0	0
566	M	19	Yes	No	No	Young Adult (15-25)	5.33	None	Yes	No	No	No	low	<1 year	public	preventive	31	0	1	2
567	F	19	Yes	No	No	Young Adult (15-25)	5.48	Primary	No	Yes	No	No	low	<1 year	public	curative	35	1	1	1
568	M	20	Yes	No	No	Young Adult (15-25)	4.11	Primary	No	Yes	No	No	low	<1 year	private	curative	36	1	1	2
569	F	23	Yes	No	No	Young Adult (15-25)	3.29	Primary	No	Yes	No	No	low	<1 year	private	curative	30	1	0	2
570	F	23	Yes	No	No	Young Adult (15-25)	6.16	Primary	No	Yes	No	No	low	<1 year	private	preventive	24	1	1	3
571	F	20	Yes	No	No	Young Adult (15-25)	6.11	Primary	No	Yes	No	No	low	<1 year	private	curative	50	1	1	2
572	M	20	Yes	No	No	Young Adult (15-25)	5.41	Primary	No	Yes	No	No	low	<1 year	private	preventive	25	0	1	3
573	F	20	Yes	No	No	Young Adult (15-25)	4.34	None	Yes	No	No	No	low	>1 year	public	preventive	14	0	1	0
574	F	21	Yes	No	No	Young Adult (15-25)	4.74	None	Yes	No	No	No	low	>1 year	private	curative	24	1	1	2
575	M	23	Yes	No	No	Young Adult (15-25)	3.23	None	Yes	No	No	No	low	>1 year	public	curative	3	1	1	0
576	F	19	Yes	No	No	Young Adult (15-25)	3.24	None	Yes	No	No	No	low	>1 year	public	curative	54	0	1	3
577	F	23	Yes	No	No	Young Adult (15-25)	5.5	None	Yes	No	No	No	low	>1 year	private	preventive	70	1	1	0
578	M	20	Yes	No	No	Young Adult (15-25)	5.04	Secondary	No	Yes	Yes	No	low	>1 year	private	preventive	27	0	1	4
579	M	21	Yes	No	No	Young Adult (15-25)	4.55	Primary	No	Yes	No	No	low	<1 year	private	preventive	42	1	0	0
580	M	19	Yes	No	No	Young Adult (15-25)	6.28	None	Yes	No	No	No	low	<1 year	private	preventive	24	0	1	0
581	F	19	Yes	No	No	Young Adult (15-25)	6.28	Primary	No	Yes	No	No	low	<1 year	private	preventive	14	1	1	1
582	M	18	Yes	No	No	Young Adult (15-25)	4.39	Primary	No	Yes	No	No	low	<1 year	public	preventive	16	0	1	1
583	F	19	Yes	No	No	Young Adult (15-25)	5.36	Secondary	No	Yes	Yes	No	low	<1 year	private	curative	15	1	1	2
584	F	20	Yes	No	No	Young Adult (15-25)	3.36	Secondary	No	Yes	Yes	No	low	<1 year	public	curative	25	0	1	1
585	F	20	Yes	No	No	Young Adult (15-25)	5.77	Secondary	No	Yes	Yes	No	low	<1 year	public	curative	32	0	1	2
586	M	21	Yes	No	No	Young Adult (15-25)	5.76	None	Yes	No	No	No	low	>1 year	private	preventive	53	1	1	4
587	F	20	Yes	No	No	Young Adult (15-25)	3.2	Primary	No	Yes	No	No	low	>1 year	private	curative	24	0	1	3
588	F	23	Yes	No	No	Young Adult (15-25)	5.46	Graduate	No	No	No	Yes	low	>1 year	private	preventive	3	0	1	4
589	M	22	Yes	No	No	Young Adult (15-25)	3.4	Graduate	No	No	No	Yes	low	>1 year	private	preventive	35	0	1	1
590	F	22	Yes	No	No	Young Adult (15-25)	2.5	Graduate	No	No	No	Yes	low	>1 year	private	curative	21	0	1	1
591	F	21	Yes	No	No	Young Adult (15-25)	6.12	Primary	No	Yes	No	No	low	>1 year	public	curative	22	0	1	1
592	M	20	Yes	No	No	Young Adult (15-25)	3.65	Primary	No	Yes	No	No	low	<1 year	private	curative	23	0	1	2
593	M	20	Yes	No	No	Young Adult (15-25)	3.9	Secondary	No	Yes	Yes	No	low	<1 year	public	preventive	33	1	1	2
594	M	21	Yes	No	No	Young Adult (15-25)	5.01	Secondary	No	Yes	Yes	No	low	<1 year	public	preventive	62	0	1	2
595	F	19	Yes	No	No	Young Adult (15-25)	6.45	Secondary	No	Yes	Yes	No	low	<1 year	private	preventive	27	0	1	2
596	M	19	Yes	No	No	Young Adult (15-25)	3.03	None	Yes	No	No	No	low	<1 year	private	preventive	2	0	1	4
597	F	19	Yes	No	No	Young Adult (15-25)	6.37	Primary	No	Yes	No	No	low	<1 year	private	preventive	24	1	1	0
598	F	20	Yes	No	No	Young Adult (15-25)	5.64	None	Yes	No	No	No	low	<1 year	private	preventive	24	0	1	2
599	F	23	Yes	No	No	Young Adult (15-25)	2.51	None	Yes	No	No	No	low	>1 year	private	curative	22	0	1	1
600	M	23	Yes	No	No	Young Adult (15-25)	4.29	Primary	No	Yes	No	No	low	>1 year	public	curative	12	1	1	2
601	F	20	Yes	No	No	Young Adult (15-25)	4.01	Primary	No	Yes	No	No	low	>1 year	private	curative	18	0	1	2
602	F	20	Yes	No	No	Young Adult (15-25)	3.64	Primary	No	Yes	No	No	low	>1 year	public	preventive	14	0	1	3
603	M	20	Yes	No	No	Young Adult (15-25)	6.55	Primary	No	Yes	No	No	low	>1 year	public	curative	15	0	1	2
604	F	21	Yes	No	No	Young Adult (15-25)	3.83	Primary	No	Yes	No	No	low	>1 year	private	preventive	25	1	1	3
605	F	23	Yes	No	No	Young Adult (15-25)	2.73	Primary	No	Yes	No	No	low	<1 year	private	preventive	28	0	1	0
606	M	19	Yes	No	No	Young Adult (15-25)	3.44	None	Yes	No	No	No	low	<1 year	private	curative	29	1	1	2
607	M	23	Yes	No	No	Young Adult (15-25)	5.55	None	Yes	No	No	No	low	<1 year	private	curative	32	0	0	0
608	M	20	Yes	No	No	Young Adult (15-25)	3.45	None	Yes	No	No	No	low	<1 year	private	curative	33	0	0	3
609	F	21	Yes	No	No	Young Adult (15-25)	5.74	None	Yes	No	No	No	low	<1 year	public	preventive	34	0	0	0
610	M	19	Yes	No	No	Young Adult (15-25)	6.13	None	Yes	No	No	No	low	>1 year	private	preventive	35	0	0	4
611	F	19	Yes	No	No	Young Adult (15-25)	4.46	Secondary	No	Yes	Yes	No	low	>1 year	public	preventive	54	0	0	0
612	F	18	Yes	No	No	Young Adult (15-25)	2.96	Primary	No	Yes	No	No	low	>1 year	public	preventive	50	0	0	0
613	F	19	Yes	No	No	Young Adult (15-25)	2.33	None	Yes	No	No	No	low	>1 year	private	preventive	28	0	0	1
614	M	20	Yes	No	No	Young Adult (15-25)	4.95	Primary	No	Yes	No	No	low	>1 year	private	preventive	20	0	0	1
615	F	20	Yes	No	No	Young Adult (15-25)	2.8	Primary	No	Yes	No	No	low	>1 year	private	curative	51	0	0	2
616	F	21	Yes	No	No	Young Adult (15-25)	2.64	Secondary	No	Yes	Yes	No	low	<1 year	private	curative	28	0	0	1
617	M	20	Yes	No	No	Young Adult (15-25)	3.34	Secondary	No	Yes	Yes	No	low	<1 year	private	curative	31	0	0	2
618	F	23	Yes	No	No	Young Adult (15-25)	5.5	Secondary	No	Yes	Yes	No	low	<1 year	public	preventive	35	0	0	4
619	F	22	Yes	No	No	Young Adult (15-25)	5.1	None	Yes	No	No	No	low	<1 year	private	curative	36	0	0	3
620	M	22	Yes	No	No	Young Adult (15-25)	4.17	Primary	No	Yes	No	No	low	<1 year	public	preventive	30	0	0	4
621	M	21	Yes	No	No	Young Adult (15-25)	2.95	Graduate	No	No	No	Yes	low	<1 year	public	preventive	24	0	0	1
622	M	20	Yes	No	No	Young Adult (15-25)	4.46	Graduate	No	No	No	Yes	low	<1 year	private	curative	50	0	0	1
623	F	20	Yes	No	No	Young Adult (15-25)	4.42	Graduate	No	No	No	Yes	low	>1 year	private	curative	25	0	0	1
624	M	21	Yes	No	No	Young Adult (15-25)	4.03	Primary	No	Yes	No	No	low	>1 year	private	curative	14	1	0	2
625	F	19	Yes	No	No	Young Adult (15-25)	3.65	Primary	No	Yes	No	No	low	>1 year	private	preventive	24	1	0	2
626	F	19	Yes	No	No	Young Adult (15-25)	5.29	Secondary	No	Yes	Yes	No	low	>1 year	private	preventive	3	0	0	4
627	F	19	Yes	No	No	Young Adult (15-25)	5.88	Secondary	No	Yes	Yes	No	low	>1 year	public	preventive	54	1	1	3
628	M	20	Yes	No	No	Young Adult (15-25)	5.83	Secondary	No	Yes	Yes	No	low	>1 year	private	preventive	70	1	1	4
629	F	23	Yes	No	No	Young Adult (15-25)	3.67	None	Yes	No	No	No	low	<1 year	public	preventive	27	1	0	1
630	F	23	Yes	No	No	Young Adult (15-25)	4.63	Primary	No	Yes	No	No	low	<1 year	public	preventive	42	0	0	1
631	M	20	Yes	No	No	Young Adult (15-25)	5.87	None	Yes	No	No	No	low	<1 year	private	curative	24	1	1	1
632	F	20	Yes	No	No	Young Adult (15-25)	3.77	None	Yes	No	No	No	low	<1 year	private	curative	14	1	1	2
633	F	20	Yes	No	No	Young Adult (15-25)	4.57	Primary	No	Yes	No	No	low	<1 year	private	curative	16	0	0	2
634	M	21	Yes	No	No	Young Adult (15-25)	4.16	Primary	No	Yes	No	No	low	<1 year	private	preventive	15	1	1	2
635	M	23	Yes	No	No	Young Adult (15-25)	4.61	Primary	No	Yes	No	No	low	<1 year	private	curative	25	1	1	2
636	M	19	Yes	No	No	Young Adult (15-25)	3.74	Primary	No	Yes	No	No	low	>1 year	public	preventive	32	1	0	4
637	F	23	Yes	No	No	Young Adult (15-25)	4.64	Primary	No	Yes	No	No	low	>1 year	private	preventive	53	0	1	0
638	M	20	Yes	No	No	Young Adult (15-25)	4.56	Primary	No	Yes	No	No	low	>1 year	public	curative	24	1	1	2
639	F	21	Yes	No	No	Young Adult (15-25)	5.42	None	Yes	No	No	No	low	>1 year	public	curative	3	1	1	1
640	F	19	Yes	No	No	Young Adult (15-25)	3.02	None	Yes	No	No	No	low	>1 year	private	curative	35	1	0	2
641	F	19	Yes	No	No	Young Adult (15-25)	6.02	None	Yes	No	No	No	low	>1 year	private	preventive	21	0	0	2
642	M	18	Yes	No	No	Young Adult (15-25)	2.71	None	Yes	No	No	No	low	<1 year	private	preventive	22	1	1	3
643	F	19	Yes	No	No	Young Adult (15-25)	3.85	None	Yes	No	No	No	low	<1 year	private	preventive	23	1	0	2
644	F	20	Yes	No	No	Young Adult (15-25)	4.24	Secondary	No	Yes	Yes	No	low	<1 year	private	preventive	33	1	0	3
645	M	20	Yes	No	No	Young Adult (15-25)	6.45	Primary	No	Yes	No	No	low	<1 year	public	preventive	62	0	1	0
646	F	21	Yes	No	No	Young Adult (15-25)	6.46	None	Yes	No	No	No	low	<1 year	private	preventive	27	1	1	2
647	F	20	Yes	No	No	Young Adult (15-25)	5.03	Primary	No	Yes	No	No	low	<1 year	public	curative	2	1	1	0
648	M	23	Yes	No	No	Young Adult (15-25)	2.38	Primary	No	Yes	No	No	low	<1 year	public	curative	24	1	0	3
649	M	22	Yes	No	No	Young Adult (15-25)	5.48	Secondary	No	Yes	Yes	No	low	>1 year	private	curative	24	0	0	0
650	M	22	Yes	No	No	Young Adult (15-25)	3.34	Secondary	No	Yes	Yes	No	low	>1 year	private	preventive	22	0	1	4
651	F	21	Yes	No	No	Young Adult (15-25)	5.92	Secondary	No	Yes	Yes	No	low	>1 year	private	curative	12	1	1	0
652	M	20	Yes	No	No	Young Adult (15-25)	4.34	None	Yes	No	No	No	low	>1 year	private	preventive	18	1	0	0
653	F	20	Yes	No	No	Young Adult (15-25)	3.07	Primary	No	Yes	No	No	low	>1 year	private	preventive	14	1	1	1
654	F	21	Yes	No	No	Young Adult (15-25)	3.9	Graduate	No	No	No	Yes	low	>1 year	public	curative	15	1	1	1
655	F	19	Yes	No	No	Young Adult (15-25)	6.33	Graduate	No	No	No	Yes	low	<1 year	private	curative	25	0	0	2
656	M	19	Yes	No	No	Young Adult (15-25)	3.97	Graduate	No	No	No	Yes	low	<1 year	public	curative	28	0	1	1
657	F	19	Yes	No	No	Young Adult (15-25)	4.66	Primary	No	Yes	No	No	low	<1 year	public	preventive	29	1	1	2
658	F	20	Yes	No	No	Young Adult (15-25)	2.5	Primary	No	Yes	No	No	low	<1 year	private	preventive	32	1	1	4
659	M	23	Yes	No	No	Young Adult (15-25)	5.09	Secondary	No	Yes	Yes	No	low	<1 year	private	preventive	33	0	1	3
660	F	23	Yes	No	No	Young Adult (15-25)	6.3	Secondary	No	Yes	Yes	No	low	<1 year	private	preventive	34	0	1	4
661	F	30	No	Yes	No	Adult (30-54)	3	Secondary	No	Yes	Yes	No	high	<1 year	private	preventive	35	1	0	1
662	M	49	No	Yes	No	Adult (30-54)	2.67	None	Yes	No	No	No	high	>1 year	private	preventive	54	0	0	1
663	M	35	No	Yes	No	Adult (30-54)	3.2	Primary	No	Yes	No	No	high	>1 year	public	curative	50	1	1	1
664	M	35	No	Yes	No	Adult (30-54)	3.3	None	Yes	No	No	No	high	>1 year	private	curative	28	0	1	2
665	F	40	No	Yes	No	Adult (30-54)	1.96	None	Yes	No	No	No	high	>1 year	public	curative	20	1	0	2
666	M	41	No	Yes	No	Adult (30-54)	2.17	Primary	No	Yes	No	No	high	>1 year	public	preventive	51	1	0	2
667	F	46	No	Yes	No	Adult (30-54)	2.67	Primary	No	Yes	No	No	high	>1 year	private	curative	28	0	1	2
668	F	38	No	Yes	No	Adult (30-54)	2.28	Primary	No	Yes	No	No	high	<1 year	private	preventive	31	1	1	4
669	F	50	No	Yes	No	Adult (30-54)	2.03	Primary	No	Yes	No	No	high	<1 year	private	preventive	35	1	1	0
670	M	41	No	Yes	No	Adult (30-54)	4.17	Primary	No	Yes	No	No	high	<1 year	private	curative	36	1	0	2
671	F	32	No	Yes	No	Adult (30-54)	3.96	Primary	No	Yes	No	No	high	<1 year	private	curative	30	1	1	1
672	F	30	No	Yes	No	Adult (30-54)	3.5	None	Yes	No	No	No	high	<1 year	public	curative	24	1	1	2
673	M	30	No	Yes	No	Adult (30-54)	3.58	None	Yes	No	No	No	high	<1 year	private	preventive	50	0	1	2
674	F	35	No	Yes	No	Adult (30-54)	2.06	None	Yes	No	No	No	high	<1 year	public	preventive	25	0	1	3
675	F	30	No	Yes	No	Adult (30-54)	4.17	None	Yes	No	No	No	high	>1 year	public	preventive	14	1	1	2
676	M	49	No	Yes	No	Adult (30-54)	3.25	None	Yes	No	No	No	high	>1 year	private	preventive	24	1	1	3
677	M	35	No	Yes	No	Adult (30-54)	2.78	Secondary	No	Yes	Yes	No	high	>1 year	private	preventive	3	0	1	0
678	M	35	No	Yes	No	Adult (30-54)	3.47	Primary	No	Yes	No	No	high	>1 year	private	preventive	54	1	1	2
679	F	40	No	Yes	No	Adult (30-54)	3.11	None	Yes	No	No	No	high	>1 year	private	curative	70	0	1	0
680	M	41	No	Yes	No	Adult (30-54)	4.14	Primary	No	Yes	No	No	high	>1 year	private	curative	27	1	0	3
681	F	46	No	Yes	No	Adult (30-54)	4.06	Primary	No	Yes	No	No	high	<1 year	public	curative	42	0	1	0
682	F	38	No	Yes	No	Adult (30-54)	2.72	Secondary	No	Yes	Yes	No	high	<1 year	private	preventive	24	1	1	4
683	F	50	No	Yes	No	Adult (30-54)	2.52	Secondary	No	Yes	Yes	No	high	<1 year	public	curative	14	0	1	0
684	M	41	No	Yes	No	Adult (30-54)	2.62	Secondary	No	Yes	Yes	No	high	<1 year	public	preventive	16	1	1	0
685	F	32	No	Yes	No	Adult (30-54)	2.05	None	Yes	No	No	No	high	<1 year	private	preventive	15	0	1	1
686	F	30	No	Yes	No	Adult (30-54)	3.45	Primary	No	Yes	No	No	high	>1 year	private	curative	25	0	1	1
687	M	30	No	Yes	No	Adult (30-54)	3.16	Graduate	No	No	No	Yes	high	>1 year	private	curative	32	1	1	2
688	F	35	No	Yes	No	Adult (30-54)	2.82	Graduate	No	No	No	Yes	high	>1 year	private	curative	53	0	1	1
689	F	30	No	Yes	No	Adult (30-54)	3.16	Graduate	No	No	No	Yes	high	>1 year	private	preventive	24	0	1	2
690	M	49	No	Yes	No	Adult (30-54)	4.02	Primary	No	Yes	No	No	high	>1 year	public	preventive	3	0	1	4
691	M	35	No	Yes	No	Adult (30-54)	2.32	Primary	No	Yes	No	No	high	>1 year	private	preventive	35	0	1	3
692	M	35	No	Yes	No	Adult (30-54)	2.87	Secondary	No	Yes	Yes	No	high	<1 year	public	preventive	21	0	1	4
693	F	40	No	Yes	No	Adult (30-54)	3.77	Secondary	No	Yes	Yes	No	high	<1 year	public	preventive	22	0	1	1
694	M	41	No	Yes	No	Adult (30-54)	3.04	Secondary	No	Yes	Yes	No	high	<1 year	private	preventive	23	1	1	1
695	F	46	No	Yes	No	Adult (30-54)	3.31	None	Yes	No	No	No	high	<1 year	private	curative	33	0	1	1
696	F	38	No	Yes	No	Adult (30-54)	2.39	Primary	No	Yes	No	No	high	<1 year	private	curative	62	0	1	2
697	F	50	No	Yes	No	Adult (30-54)	3.27	None	Yes	No	No	No	high	<1 year	private	curative	27	0	1	2
698	M	41	No	Yes	No	Adult (30-54)	2.62	None	Yes	No	No	No	high	<1 year	private	preventive	2	1	1	2
699	F	32	No	Yes	No	Adult (30-54)	3.46	Primary	No	Yes	No	No	high	>1 year	public	curative	24	0	1	2
700	F	30	No	Yes	No	Adult (30-54)	3.11	Primary	No	Yes	No	No	high	>1 year	private	preventive	24	0	1	4
701	M	30	No	Yes	No	Adult (30-54)	2.96	Primary	No	Yes	No	No	high	>1 year	public	preventive	22	1	1	0
702	F	35	No	Yes	No	Adult (30-54)	2.4	Primary	No	Yes	No	No	high	>1 year	public	curative	12	0	1	2
703	F	30	No	Yes	No	Adult (30-54)	3.22	Primary	No	Yes	No	No	high	>1 year	private	curative	18	0	1	1
704	M	49	No	Yes	No	Adult (30-54)	2.41	Primary	No	Yes	No	No	high	>1 year	private	curative	14	0	1	2
705	M	35	No	Yes	No	Adult (30-54)	1.86	None	Yes	No	No	No	high	<1 year	private	preventive	15	1	1	2
706	M	35	No	Yes	No	Adult (30-54)	2.3	None	Yes	No	No	No	high	<1 year	private	preventive	25	0	1	3
707	F	40	No	Yes	No	Adult (30-54)	3.85	None	Yes	No	No	No	high	<1 year	private	preventive	28	1	1	2
708	M	41	No	Yes	No	Adult (30-54)	2.13	None	Yes	No	No	No	high	<1 year	public	preventive	29	0	0	3
709	F	46	No	Yes	No	Adult (30-54)	2.54	None	Yes	No	No	No	high	<1 year	private	preventive	32	0	0	0
710	F	38	No	Yes	No	Adult (30-54)	1.86	Secondary	No	Yes	Yes	No	high	<1 year	public	preventive	33	0	0	2
711	F	50	No	Yes	No	Adult (30-54)	2.87	Primary	No	Yes	No	No	high	<1 year	public	curative	34	0	0	0
712	M	41	No	Yes	No	Adult (30-54)	2.78	None	Yes	No	No	No	high	>1 year	private	curative	35	0	0	3
713	F	32	No	Yes	No	Adult (30-54)	3.73	Primary	No	Yes	No	No	high	>1 year	private	curative	54	0	0	0
714	F	30	No	Yes	No	Adult (30-54)	3.85	Primary	No	Yes	No	No	high	>1 year	private	preventive	50	0	0	4
715	M	30	No	Yes	No	Adult (30-54)	4.17	Secondary	No	Yes	Yes	No	high	>1 year	private	curative	28	0	0	0
716	F	35	No	Yes	No	Adult (30-54)	2.93	Secondary	No	Yes	Yes	No	high	>1 year	private	preventive	20	0	0	0
717	F	30	No	Yes	No	Adult (30-54)	2.03	Secondary	No	Yes	Yes	No	high	>1 year	public	preventive	51	0	0	1
718	M	49	No	Yes	No	Adult (30-54)	2.34	None	Yes	No	No	No	high	<1 year	private	curative	28	0	0	1
719	M	35	No	Yes	No	Adult (30-54)	2.59	Primary	No	Yes	No	No	high	<1 year	public	curative	31	0	0	2
720	M	35	No	Yes	No	Adult (30-54)	2.43	Graduate	No	No	No	Yes	high	<1 year	public	curative	35	0	0	1
721	F	40	No	Yes	No	Adult (30-54)	3.33	Graduate	No	No	No	Yes	high	<1 year	private	preventive	36	0	0	2
722	M	41	No	Yes	No	Adult (30-54)	3.22	Graduate	No	No	No	Yes	high	<1 year	private	preventive	30	0	0	4
723	F	46	No	Yes	No	Adult (30-54)	4.1	Primary	No	Yes	No	No	high	<1 year	private	preventive	24	0	0	3
724	F	38	No	Yes	No	Adult (30-54)	3.44	Primary	No	Yes	No	No	high	<1 year	private	preventive	50	0	0	4
725	F	50	No	Yes	No	Adult (30-54)	2.33	Secondary	No	Yes	Yes	No	high	>1 year	private	preventive	25	1	0	1
726	M	41	No	Yes	No	Adult (30-54)	2.9	Secondary	No	Yes	Yes	No	high	>1 year	public	preventive	14	1	0	1
727	F	32	No	Yes	No	Adult (30-54)	4.05	Secondary	No	Yes	Yes	No	high	>1 year	private	curative	24	0	0	1
728	F	30	No	Yes	No	Adult (30-54)	2.7	None	Yes	No	No	No	high	>1 year	public	curative	3	1	1	2
729	M	30	No	Yes	No	Adult (30-54)	2.21	Primary	No	Yes	No	No	high	>1 year	public	curative	54	1	1	2
730	F	35	No	Yes	No	Adult (30-54)	4.19	None	Yes	No	No	No	high	>1 year	private	preventive	70	1	0	4
731	F	30	No	Yes	No	Adult (30-54)	2.02	None	Yes	No	No	No	high	<1 year	private	curative	27	0	0	3
732	M	49	No	Yes	No	Adult (30-54)	2.07	Primary	No	Yes	No	No	high	<1 year	private	preventive	42	1	1	4
733	M	35	No	Yes	No	Adult (30-54)	2.1	Primary	No	Yes	No	No	high	<1 year	private	preventive	24	1	1	1
734	M	35	No	Yes	No	Adult (30-54)	3.54	Primary	No	Yes	No	No	high	<1 year	private	curative	14	0	0	1
735	F	40	No	Yes	No	Adult (30-54)	2.99	Primary	No	Yes	No	No	high	<1 year	public	curative	16	1	1	1
736	M	41	No	Yes	No	Adult (30-54)	2.42	Primary	No	Yes	No	No	high	<1 year	private	curative	15	1	1	2
737	F	30	No	Yes	No	Adult (30-54)	4.15	Primary	No	Yes	No	No	high	<1 year	public	preventive	25	1	0	2
738	F	49	No	Yes	No	Adult (30-54)	2.51	None	Yes	No	No	No	high	>1 year	public	preventive	32	0	1	2
739	F	35	No	Yes	No	Adult (30-54)	3.62	None	Yes	No	No	No	high	>1 year	private	preventive	53	1	1	2
740	M	35	No	Yes	No	Adult (30-54)	3.1	None	Yes	No	No	No	high	>1 year	private	preventive	24	1	1	4
741	F	40	No	Yes	No	Adult (30-54)	2.75	None	Yes	No	No	No	high	>1 year	private	preventive	3	1	0	0
742	F	41	No	Yes	No	Adult (30-54)	3.89	None	Yes	No	No	No	high	>1 year	private	preventive	35	0	0	2
743	M	46	No	Yes	No	Adult (30-54)	3.99	Secondary	No	Yes	Yes	No	high	>1 year	private	curative	21	1	1	1
744	F	38	No	Yes	No	Adult (30-54)	3.35	Primary	No	Yes	No	No	high	<1 year	public	curative	22	1	0	2
745	F	50	No	Yes	No	Adult (30-54)	3.51	None	Yes	No	No	No	high	<1 year	private	curative	23	1	0	2
746	M	41	No	Yes	No	Adult (30-54)	2.41	Primary	No	Yes	No	No	high	<1 year	public	preventive	33	0	1	3
747	M	32	No	Yes	No	Adult (30-54)	3.46	Primary	No	Yes	No	No	high	<1 year	public	curative	62	1	1	2
748	M	30	No	Yes	No	Adult (30-54)	2.28	Secondary	No	Yes	Yes	No	high	<1 year	private	preventive	27	1	1	3
749	F	30	No	Yes	No	Adult (30-54)	2.65	Secondary	No	Yes	Yes	No	high	<1 year	private	preventive	2	1	0	0
750	M	35	No	Yes	No	Adult (30-54)	2.95	Secondary	No	Yes	Yes	No	high	<1 year	private	curative	24	0	0	2
751	F	30	No	Yes	No	Adult (30-54)	4.25	None	Yes	No	No	No	high	>1 year	private	curative	24	0	1	0
752	F	49	No	Yes	No	Adult (30-54)	2.61	Primary	No	Yes	No	No	high	>1 year	private	curative	22	1	1	3
753	F	35	No	Yes	No	Adult (30-54)	3.97	Graduate	No	No	No	Yes	high	>1 year	public	preventive	12	1	0	0
754	M	35	No	Yes	No	Adult (30-54)	4.18	Graduate	No	No	No	Yes	high	>1 year	private	preventive	18	1	1	4
755	F	40	No	Yes	No	Adult (30-54)	2.85	Graduate	No	No	No	Yes	high	>1 year	public	preventive	14	1	1	0
756	F	41	No	Yes	No	Adult (30-54)	2.4	Primary	No	Yes	No	No	high	>1 year	public	preventive	15	0	0	0
757	M	46	No	Yes	No	Adult (30-54)	2.03	Primary	No	Yes	No	No	high	<1 year	private	preventive	25	0	1	1
758	F	38	No	Yes	No	Adult (30-54)	1.86	Secondary	No	Yes	Yes	No	high	<1 year	private	preventive	28	1	1	1
759	F	50	No	Yes	No	Adult (30-54)	3.06	Secondary	No	Yes	Yes	No	high	<1 year	private	curative	29	1	1	2
760	M	41	No	Yes	No	Adult (30-54)	3.84	Secondary	No	Yes	Yes	No	high	<1 year	private	curative	32	0	1	1
761	M	32	No	Yes	No	Adult (30-54)	2.85	None	Yes	No	No	No	high	<1 year	private	curative	33	0	1	2
762	M	30	No	Yes	No	Adult (30-54)	4.84	Primary	No	Yes	No	No	high	>1 year	public	preventive	34	1	0	4
763	F	30	No	Yes	No	Adult (30-54)	4.31	None	Yes	No	No	No	high	>1 year	private	curative	35	0	0	3
764	M	35	No	Yes	No	Adult (30-54)	4.01	None	Yes	No	No	No	high	>1 year	public	preventive	54	1	1	4
765	F	30	No	Yes	No	Adult (30-54)	4.4	Primary	No	Yes	No	No	high	>1 year	public	preventive	50	0	1	1
766	F	49	No	Yes	No	Adult (30-54)	3.3	Primary	No	Yes	No	No	high	>1 year	private	curative	28	1	0	1
767	F	35	No	Yes	No	Adult (30-54)	3.18	Primary	No	Yes	No	No	high	>1 year	private	curative	20	1	0	1
768	M	35	No	Yes	No	Adult (30-54)	2.64	Primary	No	Yes	No	No	high	<1 year	private	curative	51	0	1	2
769	F	40	No	Yes	No	Adult (30-54)	3.21	Primary	No	Yes	No	No	high	<1 year	private	preventive	28	1	1	2
770	F	41	No	Yes	No	Adult (30-54)	3.08	Primary	No	Yes	No	No	high	<1 year	private	preventive	31	1	1	2
771	M	30	No	Yes	No	Adult (30-54)	3.15	None	Yes	No	No	No	high	<1 year	public	preventive	35	1	0	2
772	F	49	No	Yes	No	Adult (30-54)	3.03	None	Yes	No	No	No	high	<1 year	private	preventive	36	1	1	4
773	F	35	No	Yes	No	Adult (30-54)	3.25	None	Yes	No	No	No	high	<1 year	public	preventive	30	1	1	0
774	M	35	No	Yes	No	Adult (30-54)	2.24	None	Yes	No	No	No	high	<1 year	public	preventive	24	0	1	2
775	M	40	No	Yes	No	Adult (30-54)	3.31	None	Yes	No	No	No	high	>1 year	private	curative	50	0	1	1
776	M	41	No	Yes	No	Adult (30-54)	3.46	Secondary	No	Yes	Yes	No	high	>1 year	private	curative	25	1	1	2
777	F	46	No	Yes	No	Adult (30-54)	3.52	Primary	No	Yes	No	No	high	>1 year	private	curative	14	1	1	2
778	M	38	No	Yes	No	Adult (30-54)	3.36	None	Yes	No	No	No	high	>1 year	private	preventive	24	0	1	3
779	F	50	No	Yes	No	Adult (30-54)	3.41	Primary	No	Yes	No	No	high	>1 year	private	curative	3	1	1	2
780	F	41	No	Yes	No	Adult (30-54)	3.61	Primary	No	Yes	No	No	high	>1 year	public	preventive	54	0	1	3
781	F	32	No	Yes	No	Adult (30-54)	2.04	Secondary	No	Yes	Yes	No	high	<1 year	private	preventive	70	1	0	0
782	M	30	No	Yes	No	Adult (30-54)	3.93	Secondary	No	Yes	Yes	No	high	<1 year	public	curative	27	0	1	2
783	F	30	No	Yes	No	Adult (30-54)	3.42	Secondary	No	Yes	Yes	No	high	<1 year	public	curative	42	1	1	0
784	F	35	No	Yes	No	Adult (30-54)	1.84	None	Yes	No	No	No	high	<1 year	private	curative	24	0	1	3
785	M	30	No	Yes	No	Adult (30-54)	3.42	Primary	No	Yes	No	No	high	<1 year	private	preventive	14	1	1	0
786	F	49	No	Yes	No	Adult (30-54)	3.63	Graduate	No	No	No	Yes	high	<1 year	private	preventive	16	0	1	4
787	F	35	No	Yes	No	Adult (30-54)	1.87	Graduate	No	No	No	Yes	high	<1 year	private	preventive	15	0	1	0
788	M	35	No	Yes	No	Adult (30-54)	3.21	Graduate	No	No	No	Yes	high	>1 year	private	preventive	25	1	1	0
789	M	40	No	Yes	No	Adult (30-54)	2.26	None	Yes	No	No	No	high	>1 year	public	preventive	32	0	1	1
790	M	41	No	Yes	No	Adult (30-54)	3.59	Primary	No	Yes	No	No	high	>1 year	private	preventive	53	0	1	1
791	F	46	No	Yes	No	Adult (30-54)	4.12	Graduate	No	No	No	Yes	high	>1 year	public	curative	24	0	1	2
792	M	38	No	Yes	No	Adult (30-54)	2.56	Graduate	No	No	No	Yes	high	>1 year	public	curative	3	0	1	1
793	F	50	No	Yes	No	Adult (30-54)	2.17	Graduate	No	No	No	Yes	high	>1 year	private	curative	35	0	1	2
794	F	41	No	Yes	No	Adult (30-54)	3.6	Primary	No	Yes	No	No	high	<1 year	private	preventive	21	0	1	4
795	F	32	No	Yes	No	Adult (30-54)	2.64	Primary	No	Yes	No	No	high	<1 year	private	curative	22	1	1	3
796	M	30	No	Yes	No	Adult (30-54)	3.28	Secondary	No	Yes	Yes	No	high	<1 year	private	preventive	23	0	1	4
797	F	30	No	Yes	No	Adult (30-54)	3.13	Secondary	No	Yes	Yes	No	high	<1 year	private	preventive	33	0	1	1
798	F	35	No	Yes	No	Adult (30-54)	2.47	Secondary	No	Yes	Yes	No	high	<1 year	public	curative	62	0	1	1
799	M	30	No	Yes	No	Adult (30-54)	3.54	None	Yes	No	No	No	high	<1 year	private	curative	27	1	1	1
800	F	49	No	Yes	No	Adult (30-54)	2.3	Primary	No	Yes	No	No	high	<1 year	public	curative	2	0	1	2
801	F	35	No	Yes	No	Adult (30-54)	3.21	None	Yes	No	No	No	high	>1 year	public	preventive	24	0	1	2
802	M	35	No	Yes	No	Adult (30-54)	3.13	None	Yes	No	No	No	high	>1 year	private	preventive	24	1	1	2
803	M	40	No	Yes	No	Adult (30-54)	2.37	Primary	No	Yes	No	No	high	>1 year	private	preventive	22	0	1	2
804	M	41	No	Yes	No	Adult (30-54)	2.78	Primary	No	Yes	No	No	high	>1 year	private	preventive	12	0	1	4
805	F	30	No	Yes	No	Adult (30-54)	3.64	Primary	No	Yes	No	No	high	>1 year	private	preventive	18	0	1	0
806	M	49	No	Yes	No	Adult (30-54)	3.53	Primary	No	Yes	No	No	high	>1 year	private	preventive	14	1	1	2
807	F	35	No	Yes	No	Adult (30-54)	2.01	Primary	No	Yes	No	No	high	<1 year	public	curative	15	0	1	1
808	F	35	No	Yes	No	Adult (30-54)	2.15	Primary	No	Yes	No	No	high	<1 year	private	curative	25	1	1	2
809	F	40	No	Yes	No	Adult (30-54)	3.72	None	Yes	No	No	No	high	<1 year	public	curative	28	0	0	2
810	M	41	No	Yes	No	Adult (30-54)	1.83	None	Yes	No	No	No	high	<1 year	public	preventive	29	0	0	3
811	F	46	No	Yes	No	Adult (30-54)	3.78	None	Yes	No	No	No	high	<1 year	private	curative	32	0	0	2
812	F	38	No	Yes	No	Adult (30-54)	3.48	None	Yes	No	No	No	high	<1 year	private	preventive	33	0	0	3
813	M	50	No	Yes	No	Adult (30-54)	3.91	None	Yes	No	No	No	high	<1 year	private	preventive	34	0	0	0
814	F	41	No	Yes	No	Adult (30-54)	2.64	Secondary	No	Yes	Yes	No	high	>1 year	private	curative	35	0	0	2
815	F	32	No	Yes	No	Adult (30-54)	2.05	Primary	No	Yes	No	No	high	>1 year	private	curative	54	0	0	0
816	M	30	No	Yes	No	Adult (30-54)	4.12	None	Yes	No	No	No	high	>1 year	public	curative	50	0	0	3
817	M	30	No	Yes	No	Adult (30-54)	3.74	Primary	No	Yes	No	No	high	>1 year	private	preventive	28	0	0	0
818	M	35	No	Yes	No	Adult (30-54)	4	Primary	No	Yes	No	No	high	>1 year	public	preventive	20	0	0	4
819	F	30	No	Yes	No	Adult (30-54)	3.94	Secondary	No	Yes	Yes	No	high	>1 year	public	preventive	51	0	0	0
820	M	49	No	Yes	No	Adult (30-54)	2.34	Secondary	No	Yes	Yes	No	high	<1 year	private	preventive	28	0	0	0
821	F	35	No	Yes	No	Adult (30-54)	3.77	Secondary	No	Yes	Yes	No	high	<1 year	private	preventive	31	0	0	1
822	F	35	No	Yes	No	Adult (30-54)	3.51	None	Yes	No	No	No	high	<1 year	private	preventive	35	0	0	1
823	F	40	No	Yes	No	Adult (30-54)	2.75	Primary	No	Yes	No	No	high	<1 year	private	curative	36	0	0	2
824	M	41	No	Yes	No	Adult (30-54)	3.35	Graduate	No	No	No	Yes	high	<1 year	private	curative	30	0	0	1
825	F	46	No	Yes	No	Adult (30-54)	3.33	Graduate	No	No	No	Yes	high	<1 year	public	curative	24	0	0	2
826	F	38	No	Yes	No	Adult (30-54)	3.32	Graduate	No	No	No	Yes	high	<1 year	private	preventive	50	1	0	4
827	M	50	No	Yes	No	Adult (30-54)	3.85	Primary	No	Yes	No	No	high	>1 year	public	curative	25	1	0	3
828	F	41	No	Yes	No	Adult (30-54)	2.15	Primary	No	Yes	No	No	high	>1 year	public	preventive	14	0	0	4
829	F	32	No	Yes	No	Adult (30-54)	2.05	Secondary	No	Yes	Yes	No	high	>1 year	private	preventive	24	1	1	1
830	M	30	No	Yes	No	Adult (30-54)	3.13	Secondary	No	Yes	Yes	No	high	>1 year	private	curative	3	1	1	1
831	M	30	No	Yes	No	Adult (30-54)	3.08	Secondary	No	Yes	Yes	No	high	>1 year	private	curative	54	1	0	1
832	M	35	No	Yes	No	Adult (30-54)	4.05	None	Yes	No	No	No	high	>1 year	private	curative	70	0	0	2
833	F	30	No	Yes	No	Adult (30-54)	3.06	Primary	No	Yes	No	No	high	<1 year	private	preventive	27	1	1	2
834	M	49	No	Yes	No	Adult (30-54)	2.28	None	Yes	No	No	No	high	<1 year	public	preventive	42	1	1	4
835	F	35	No	Yes	No	Adult (30-54)	2.25	None	Yes	No	No	No	high	<1 year	private	preventive	24	0	0	3
836	F	35	No	Yes	No	Adult (30-54)	2.55	Primary	No	Yes	No	No	high	<1 year	public	preventive	14	1	1	4
837	F	40	No	Yes	No	Adult (30-54)	3.49	Primary	No	Yes	No	No	high	<1 year	public	preventive	16	1	1	1
838	M	41	No	Yes	No	Adult (30-54)	3.99	Primary	No	Yes	No	No	high	>1 year	private	preventive	15	1	0	1
839	F	30	No	Yes	No	Adult (30-54)	3.29	Primary	No	Yes	No	No	high	>1 year	private	curative	25	0	1	1
840	F	49	No	Yes	No	Adult (30-54)	3.91	Primary	No	Yes	No	No	high	>1 year	private	curative	32	1	1	2
841	M	35	No	Yes	No	Adult (30-54)	1.95	Primary	No	Yes	No	No	high	>1 year	private	curative	53	1	1	2
842	F	35	No	Yes	No	Adult (30-54)	2.5	None	Yes	No	No	No	high	>1 year	private	preventive	24	1	0	2
843	F	40	No	Yes	No	Adult (30-54)	2.47	None	Yes	No	No	No	high	>1 year	public	curative	3	0	0	2
844	M	41	No	Yes	No	Adult (30-54)	3.19	None	Yes	No	No	No	high	<1 year	private	preventive	35	1	1	4
845	M	46	No	Yes	No	Adult (30-54)	3.98	None	Yes	No	No	No	high	<1 year	public	preventive	21	1	0	0
846	M	38	No	Yes	No	Adult (30-54)	3.92	None	Yes	No	No	No	high	<1 year	public	curative	22	1	0	2
847	F	50	No	Yes	No	Adult (30-54)	3.94	Secondary	No	Yes	Yes	No	high	<1 year	private	curative	23	0	1	1
848	M	41	No	Yes	No	Adult (30-54)	2.23	Primary	No	Yes	No	No	high	<1 year	private	curative	33	1	1	2
849	F	32	No	Yes	No	Adult (30-54)	3.27	None	Yes	No	No	No	high	<1 year	private	preventive	62	1	1	2
850	F	30	No	Yes	No	Adult (30-54)	2.94	Primary	No	Yes	No	No	high	<1 year	private	preventive	27	1	0	3
851	F	30	No	Yes	No	Adult (30-54)	3.37	Primary	No	Yes	No	No	high	>1 year	private	preventive	2	0	0	2
852	M	35	No	Yes	No	Adult (30-54)	2.39	Secondary	No	Yes	Yes	No	high	>1 year	public	preventive	24	0	1	3
853	F	30	No	Yes	No	Adult (30-54)	3.31	Secondary	No	Yes	Yes	No	high	>1 year	private	preventive	24	1	1	0
854	F	49	No	Yes	No	Adult (30-54)	4.15	Secondary	No	Yes	Yes	No	high	>1 year	public	preventive	22	1	0	2
855	M	35	No	Yes	No	Adult (30-54)	2.78	None	Yes	No	No	No	high	>1 year	public	curative	12	1	1	0
856	F	35	No	Yes	No	Adult (30-54)	4.11	Primary	No	Yes	No	No	high	>1 year	private	curative	18	1	1	3
857	F	40	No	Yes	No	Adult (30-54)	3.37	Graduate	No	No	No	Yes	high	<1 year	private	curative	14	0	0	0
858	M	41	No	Yes	No	Adult (30-54)	3.67	Graduate	No	No	No	Yes	high	<1 year	private	preventive	15	0	1	4
859	M	46	No	Yes	No	Adult (30-54)	2.65	Graduate	No	No	No	Yes	high	<1 year	private	curative	25	1	1	0
860	M	38	No	Yes	No	Adult (30-54)	3.42	Primary	No	Yes	No	No	high	<1 year	private	preventive	28	1	1	0
861	F	50	No	Yes	No	Adult (30-54)	2.52	Primary	No	Yes	No	No	high	<1 year	public	preventive	29	0	1	1
862	M	41	No	Yes	No	Adult (30-54)	2.92	Secondary	No	Yes	Yes	No	high	<1 year	private	curative	32	0	1	1
863	F	32	No	Yes	No	Adult (30-54)	4.15	Secondary	No	Yes	Yes	No	high	<1 year	public	curative	33	1	0	2
864	F	30	No	Yes	No	Adult (30-54)	3.01	Secondary	No	Yes	Yes	No	high	>1 year	public	curative	34	0	0	1
865	F	30	No	Yes	No	Adult (30-54)	3.23	None	Yes	No	No	No	high	>1 year	private	preventive	35	1	1	2
866	M	35	No	Yes	No	Adult (30-54)	2.31	Primary	No	Yes	No	No	high	>1 year	private	preventive	54	0	1	4
867	F	30	No	Yes	No	Adult (30-54)	3.65	None	Yes	No	No	No	high	>1 year	private	preventive	50	1	0	3
868	F	49	No	Yes	No	Adult (30-54)	2.32	None	Yes	No	No	No	high	>1 year	private	preventive	28	1	0	4
869	M	35	No	Yes	No	Adult (30-54)	2.59	Primary	No	Yes	No	No	high	>1 year	private	preventive	20	0	1	1
870	F	35	No	Yes	No	Adult (30-54)	2.85	Primary	No	Yes	No	No	high	<1 year	public	preventive	51	1	1	1
871	F	40	No	Yes	No	Adult (30-54)	2.42	Primary	No	Yes	No	No	high	<1 year	private	curative	28	1	1	1
872	M	41	No	Yes	No	Adult (30-54)	2.78	Primary	No	Yes	No	No	high	<1 year	public	curative	31	1	0	2
873	M	30	No	Yes	No	Adult (30-54)	3.8	Primary	No	Yes	No	No	high	<1 year	public	curative	35	1	1	2
874	M	49	No	Yes	No	Adult (30-54)	2.12	Primary	No	Yes	No	No	high	<1 year	private	preventive	36	1	1	2
875	F	35	No	Yes	No	Adult (30-54)	2.4	None	Yes	No	No	No	high	<1 year	private	curative	30	0	1	2
876	M	35	No	Yes	No	Adult (30-54)	2.11	None	Yes	No	No	No	high	<1 year	private	preventive	24	0	1	4
877	F	40	No	Yes	No	Adult (30-54)	3.03	None	Yes	No	No	No	high	>1 year	private	preventive	50	1	1	0
878	F	41	No	Yes	No	Adult (30-54)	2.38	None	Yes	No	No	No	high	>1 year	private	curative	25	1	1	2
879	F	46	No	Yes	No	Adult (30-54)	3.31	None	Yes	No	No	No	high	>1 year	public	curative	14	0	1	1
880	M	38	No	Yes	No	Adult (30-54)	3.21	Secondary	No	Yes	Yes	No	high	>1 year	private	curative	24	1	1	2
881	F	50	No	Yes	No	Adult (30-54)	3.51	Primary	No	Yes	No	No	high	>1 year	public	preventive	3	0	1	2
882	F	41	No	Yes	No	Adult (30-54)	3.15	None	Yes	No	No	No	high	>1 year	public	preventive	54	1	0	3
883	M	32	No	Yes	No	Adult (30-54)	2.41	Primary	No	Yes	No	No	high	<1 year	private	preventive	70	0	1	2
884	F	30	No	Yes	No	Adult (30-54)	3.91	Primary	No	Yes	No	No	high	<1 year	private	preventive	27	1	1	3
885	F	30	No	Yes	No	Adult (30-54)	4.18	Secondary	No	Yes	Yes	No	high	<1 year	private	preventive	42	0	1	0
886	M	35	No	Yes	No	Adult (30-54)	1.92	Secondary	No	Yes	Yes	No	high	<1 year	private	preventive	24	1	1	2
887	M	30	No	Yes	No	Adult (30-54)	3.03	Secondary	No	Yes	Yes	No	high	<1 year	private	curative	14	0	1	0
888	M	49	No	Yes	No	Adult (30-54)	3.97	None	Yes	No	No	No	high	<1 year	public	curative	16	0	1	3
889	F	35	No	Yes	No	Adult (30-54)	3.98	Primary	No	Yes	No	No	high	<1 year	private	curative	15	1	1	0
890	M	35	No	Yes	No	Adult (30-54)	4.07	Graduate	No	No	No	Yes	high	>1 year	public	preventive	25	0	1	4
891	F	40	No	Yes	No	Adult (30-54)	2.92	Graduate	No	No	No	Yes	high	>1 year	public	curative	32	0	1	0
892	F	41	No	Yes	No	Adult (30-54)	2.02	Graduate	No	No	No	Yes	high	>1 year	private	preventive	53	0	1	0
893	F	46	No	Yes	No	Adult (30-54)	2.54	Primary	No	Yes	No	No	high	>1 year	private	preventive	24	0	1	1
894	M	38	No	Yes	No	Adult (30-54)	2.22	Primary	No	Yes	No	No	high	>1 year	private	curative	3	0	1	1
895	F	50	No	Yes	No	Adult (30-54)	2.5	Secondary	No	Yes	Yes	No	high	>1 year	private	curative	35	0	1	2
896	F	41	No	Yes	No	Adult (30-54)	3.02	Secondary	No	Yes	Yes	No	high	<1 year	private	curative	21	1	1	1
897	M	32	No	Yes	No	Adult (30-54)	3.34	Secondary	No	Yes	Yes	No	high	<1 year	public	preventive	22	0	1	2
898	F	30	No	Yes	No	Adult (30-54)	3.25	None	Yes	No	No	No	high	<1 year	private	preventive	23	0	1	4
899	F	30	No	Yes	No	Adult (30-54)	3.75	Primary	No	Yes	No	No	high	<1 year	public	preventive	33	0	1	3
900	M	35	No	Yes	No	Adult (30-54)	3.96	None	Yes	No	No	No	high	<1 year	public	preventive	62	1	1	4
901	M	30	No	Yes	No	Adult (30-54)	3.13	None	Yes	No	No	No	high	<1 year	private	preventive	27	0	1	1
902	M	49	No	Yes	No	Adult (30-54)	3.74	Primary	No	Yes	No	No	high	<1 year	private	preventive	2	0	1	1
903	F	35	No	Yes	No	Adult (30-54)	3.93	Primary	No	Yes	No	No	high	>1 year	private	curative	24	1	1	1
904	M	35	No	Yes	No	Adult (30-54)	2.34	Primary	No	Yes	No	No	high	>1 year	private	curative	24	0	1	2
905	F	40	No	Yes	No	Adult (30-54)	2.55	Primary	No	Yes	No	No	high	>1 year	private	curative	22	0	1	2
906	F	41	No	Yes	No	Adult (30-54)	3.16	Primary	No	Yes	No	No	high	>1 year	public	preventive	12	0	1	2
907	F	30	No	Yes	No	Adult (30-54)	3.28	Primary	No	Yes	No	No	high	>1 year	private	curative	18	1	1	2
908	M	49	No	Yes	No	Adult (30-54)	3.63	None	Yes	No	No	No	high	>1 year	public	preventive	14	0	1	4
909	F	35	No	Yes	No	Adult (30-54)	1.97	None	Yes	No	No	No	high	<1 year	public	preventive	15	1	1	0
910	F	35	No	Yes	No	Adult (30-54)	3.69	None	Yes	No	No	No	high	<1 year	private	curative	25	0	0	2
911	M	40	No	Yes	No	Adult (30-54)	2.61	None	Yes	No	No	No	high	<1 year	private	curative	28	0	0	1
912	F	41	No	Yes	No	Adult (30-54)	2.29	None	Yes	No	No	No	high	<1 year	private	curative	29	0	0	2
913	F	46	No	Yes	No	Adult (30-54)	3.39	Secondary	No	Yes	Yes	No	high	<1 year	private	preventive	32	0	0	2
914	M	38	No	Yes	No	Adult (30-54)	3.69	Primary	No	Yes	No	No	high	>1 year	private	preventive	33	0	0	3
915	M	50	No	Yes	No	Adult (30-54)	3.72	None	Yes	No	No	No	high	>1 year	public	preventive	34	0	0	2
916	M	41	No	Yes	No	Adult (30-54)	2.31	Primary	No	Yes	No	No	high	>1 year	private	preventive	35	0	0	3
917	F	32	No	Yes	No	Adult (30-54)	2.1	Primary	No	Yes	No	No	high	>1 year	public	preventive	54	0	0	0
918	M	30	No	Yes	No	Adult (30-54)	3.03	Secondary	No	Yes	Yes	No	high	>1 year	public	preventive	50	0	0	2
919	F	30	No	Yes	No	Adult (30-54)	2.27	Secondary	No	Yes	Yes	No	high	>1 year	private	curative	28	0	0	0
920	F	35	No	Yes	No	Adult (30-54)	2.05	Secondary	No	Yes	Yes	No	high	<1 year	private	curative	20	0	0	3
921	F	30	No	Yes	No	Adult (30-54)	2.56	None	Yes	No	No	No	high	<1 year	private	curative	51	0	0	0
922	M	49	No	Yes	No	Adult (30-54)	3.51	Primary	No	Yes	No	No	high	<1 year	private	preventive	28	0	0	4
923	F	35	No	Yes	No	Adult (30-54)	2.26	Graduate	No	No	No	Yes	high	<1 year	private	curative	31	0	0	0
924	F	35	No	Yes	No	Adult (30-54)	4.13	Graduate	No	No	No	Yes	high	<1 year	public	preventive	35	0	0	0
925	M	40	No	Yes	No	Adult (30-54)	3.85	Graduate	No	No	No	Yes	high	<1 year	private	preventive	36	0	0	1
926	F	41	No	Yes	No	Adult (30-54)	2.02	Primary	No	Yes	No	No	high	<1 year	public	curative	30	0	0	1
927	F	46	No	Yes	No	Adult (30-54)	3.55	Primary	No	Yes	No	No	high	>1 year	public	curative	24	1	0	2
928	M	38	No	Yes	No	Adult (30-54)	2.81	Secondary	No	Yes	Yes	No	high	>1 year	private	curative	50	1	0	1
929	M	50	No	Yes	No	Adult (30-54)	4.04	Secondary	No	Yes	Yes	No	high	>1 year	private	preventive	25	0	0	2
930	M	41	No	Yes	No	Adult (30-54)	2.17	Secondary	No	Yes	Yes	No	high	>1 year	private	preventive	14	1	1	4
931	F	32	No	Yes	No	Adult (30-54)	3.3	None	Yes	No	No	No	high	>1 year	private	preventive	24	1	1	3
932	M	30	No	Yes	No	Adult (30-54)	3.19	Primary	No	Yes	No	No	high	>1 year	private	preventive	3	1	0	4
933	F	30	No	Yes	No	Adult (30-54)	2.67	None	Yes	No	No	No	high	<1 year	public	preventive	54	0	0	1
934	F	35	No	Yes	No	Adult (30-54)	3.31	None	Yes	No	No	No	high	<1 year	private	preventive	70	1	1	1
935	F	30	No	Yes	No	Adult (30-54)	2.62	Primary	No	Yes	No	No	high	<1 year	public	curative	27	1	1	1
936	M	49	No	Yes	No	Adult (30-54)	3.14	Primary	No	Yes	No	No	high	<1 year	public	curative	42	0	0	2
937	F	35	No	Yes	No	Adult (30-54)	2.94	Primary	No	Yes	No	No	high	<1 year	private	curative	24	1	1	2
938	F	35	No	Yes	No	Adult (30-54)	3.49	Primary	No	Yes	No	No	high	<1 year	private	preventive	14	1	1	4
939	M	40	No	Yes	No	Adult (30-54)	1.98	Primary	No	Yes	No	No	high	<1 year	private	curative	16	1	0	3
940	F	41	No	Yes	No	Adult (30-54)	2.79	Primary	No	Yes	No	No	high	>1 year	private	preventive	15	0	1	4
941	F	30	No	Yes	No	Adult (30-54)	2.63	None	Yes	No	No	No	high	>1 year	private	preventive	25	1	1	1
942	M	49	No	Yes	No	Adult (30-54)	2.24	None	Yes	No	No	No	high	>1 year	public	curative	32	1	1	1
943	M	35	No	Yes	No	Adult (30-54)	3.3	None	Yes	No	No	No	high	>1 year	private	curative	53	1	0	1
944	M	35	No	Yes	No	Adult (30-54)	3.16	None	Yes	No	No	No	high	>1 year	public	curative	24	0	0	2
945	F	40	No	Yes	No	Adult (30-54)	3.82	None	Yes	No	No	No	high	>1 year	public	preventive	3	1	1	2
946	M	41	No	Yes	No	Adult (30-54)	1.88	Secondary	No	Yes	Yes	No	high	<1 year	private	preventive	35	1	0	2
947	F	46	No	Yes	No	Adult (30-54)	4.17	Primary	No	Yes	No	No	high	<1 year	private	preventive	21	1	0	2
948	F	38	No	Yes	No	Adult (30-54)	2.53	None	Yes	No	No	No	high	<1 year	private	preventive	22	0	1	4
949	F	50	No	Yes	No	Adult (30-54)	2.88	Primary	No	Yes	No	No	high	<1 year	private	preventive	23	1	1	0
950	M	41	No	Yes	No	Adult (30-54)	3.27	Primary	No	Yes	No	No	high	<1 year	private	preventive	33	1	1	2
951	F	32	No	Yes	No	Adult (30-54)	2.67	Secondary	No	Yes	Yes	No	high	<1 year	public	curative	62	1	0	1
952	F	30	No	Yes	No	Adult (30-54)	1.91	Secondary	No	Yes	Yes	No	high	<1 year	private	curative	27	0	0	2
953	M	30	No	Yes	No	Adult (30-54)	3.09	Secondary	No	Yes	Yes	No	high	>1 year	public	curative	2	0	1	2
954	F	35	No	Yes	No	Adult (30-54)	2.65	None	Yes	No	No	No	high	>1 year	public	preventive	24	1	1	3
955	F	30	No	Yes	No	Adult (30-54)	3.45	Primary	No	Yes	No	No	high	>1 year	private	curative	24	1	0	2
956	M	49	No	Yes	No	Adult (30-54)	2.73	Graduate	No	No	No	Yes	high	>1 year	private	preventive	22	1	1	3
957	M	35	No	Yes	No	Adult (30-54)	3.56	Graduate	No	No	No	Yes	high	>1 year	private	preventive	12	1	1	0
958	M	35	No	Yes	No	Adult (30-54)	2.25	Graduate	No	No	No	Yes	high	>1 year	private	curative	18	0	0	2
959	F	40	No	Yes	No	Adult (30-54)	2.52	Primary	No	Yes	No	No	high	<1 year	private	curative	14	0	1	0
960	M	41	No	Yes	No	Adult (30-54)	2.41	Primary	No	Yes	No	No	high	<1 year	public	curative	15	1	1	3
961	F	46	No	Yes	No	Adult (30-54)	2.92	Secondary	No	Yes	Yes	No	high	<1 year	private	preventive	25	1	1	0
962	F	38	No	Yes	No	Adult (30-54)	2.49	Secondary	No	Yes	Yes	No	high	<1 year	public	preventive	28	0	1	4
963	F	50	No	Yes	No	Adult (30-54)	3.7	Secondary	No	Yes	Yes	No	high	<1 year	public	preventive	29	0	1	0
964	M	41	No	Yes	No	Adult (30-54)	1.92	None	Yes	No	No	No	high	<1 year	private	preventive	32	1	0	0
965	F	32	No	Yes	No	Adult (30-54)	3.27	Primary	No	Yes	No	No	high	<1 year	private	preventive	33	0	0	1
966	F	30	No	Yes	No	Adult (30-54)	3.24	None	Yes	No	No	No	high	>1 year	private	preventive	34	1	1	1
967	M	30	No	Yes	No	Adult (30-54)	3.13	None	Yes	No	No	No	high	>1 year	private	curative	35	0	1	2
968	F	35	No	Yes	No	Adult (30-54)	3.77	Primary	No	Yes	No	No	high	>1 year	private	curative	54	1	0	1
969	F	30	No	Yes	No	Adult (30-54)	2.32	Primary	No	Yes	No	No	high	>1 year	public	curative	50	1	0	2
970	M	49	No	Yes	No	Adult (30-54)	4.11	Primary	No	Yes	No	No	high	>1 year	private	preventive	28	0	1	4
971	M	35	No	Yes	No	Adult (30-54)	1.84	Primary	No	Yes	No	No	high	>1 year	public	curative	20	1	1	3
972	M	35	No	Yes	No	Adult (30-54)	3.26	Primary	No	Yes	No	No	high	<1 year	public	preventive	51	1	1	4
973	F	40	No	Yes	No	Adult (30-54)	2.78	Primary	No	Yes	No	No	high	<1 year	private	preventive	28	1	0	1
974	M	41	No	Yes	No	Adult (30-54)	3.02	None	Yes	No	No	No	high	<1 year	private	curative	31	1	1	1
975	F	35	No	Yes	No	Adult (30-54)	1.92	None	Yes	No	No	No	high	<1 year	private	curative	35	1	1	1
976	F	35	No	Yes	No	Adult (30-54)	3.87	None	Yes	No	No	No	high	<1 year	private	curative	36	0	1	2
977	F	40	No	Yes	No	Adult (30-54)	3.34	None	Yes	No	No	No	high	<1 year	private	preventive	30	0	1	2
978	M	41	No	Yes	No	Adult (30-54)	3.98	None	Yes	No	No	No	high	<1 year	public	preventive	24	1	1	2
979	F	46	No	Yes	No	Adult (30-54)	3.1	Secondary	No	Yes	Yes	No	high	>1 year	private	preventive	50	1	1	2
980	F	38	No	Yes	No	Adult (30-54)	2.72	Primary	No	Yes	No	No	high	>1 year	public	preventive	25	0	1	4
981	M	50	No	Yes	No	Adult (30-54)	3.68	None	Yes	No	No	No	high	>1 year	public	preventive	14	1	1	0
982	F	41	No	Yes	No	Adult (30-54)	4.12	Primary	No	Yes	No	No	high	>1 year	private	preventive	24	0	1	2
983	F	32	No	Yes	No	Adult (30-54)	3.97	Primary	No	Yes	No	No	high	>1 year	private	curative	3	1	0	1
984	M	30	No	Yes	No	Adult (30-54)	3.38	Secondary	No	Yes	Yes	No	high	>1 year	private	curative	54	0	1	2
985	M	30	No	Yes	No	Adult (30-54)	2.05	Secondary	No	Yes	Yes	No	high	<1 year	private	curative	70	1	1	2
986	M	35	No	Yes	No	Adult (30-54)	2.74	Secondary	No	Yes	Yes	No	high	<1 year	private	preventive	27	0	1	3
987	F	30	No	Yes	No	Adult (30-54)	3.05	None	Yes	No	No	No	high	<1 year	public	curative	42	1	1	2
988	M	49	No	Yes	No	Adult (30-54)	3.34	Primary	No	Yes	No	No	high	<1 year	private	preventive	24	0	1	1
989	F	35	No	Yes	No	Adult (30-54)	2.32	Graduate	No	No	No	Yes	high	<1 year	public	preventive	14	0	1	2
990	F	35	No	Yes	No	Adult (30-54)	2.02	Graduate	No	No	No	Yes	high	>1 year	public	curative	16	1	1	2
991	F	40	No	Yes	No	Adult (30-54)	3.62	Graduate	No	No	No	Yes	high	>1 year	private	curative	15	1	2	3
992	M	41	No	Yes	No	Adult (30-54)	2.81	Primary	No	Yes	No	No	high	>1 year	private	curative	25	0	2	2
993	F	35	No	Yes	No	Adult (30-54)	1.9	Primary	No	Yes	No	No	high	>1 year	private	preventive	32	1	2	3
994	F	35	No	Yes	No	Adult (30-54)	2.76	Secondary	No	Yes	Yes	No	high	>1 year	private	preventive	53	1	4	0
995	M	40	No	Yes	No	Adult (30-54)	1.94	Secondary	No	Yes	Yes	No	high	>1 year	private	preventive	24	0	0	2
996	F	41	No	Yes	No	Adult (30-54)	1.98	Secondary	No	Yes	Yes	No	high	<1 year	public	preventive	3	1	2	0
997	F	46	No	Yes	No	Adult (30-54)	3.97	None	Yes	No	No	No	high	<1 year	private	preventive	35	1	1	3
998	M	38	No	Yes	No	Adult (30-54)	3.57	Primary	No	Yes	No	No	high	<1 year	public	preventive	21	1	2	0
999	M	50	No	Yes	No	Adult (30-54)	3.7	None	Yes	No	No	No	high	<1 year	public	curative	22	0	2	4
1000	M	41	No	Yes	No	Adult (30-54)	3.72	None	Yes	No	No	No	high	<1 year	private	curative	23	1	3	0
1001	F	32	No	Yes	No	Adult (30-54)	4.09	Primary	No	Yes	No	No	high	<1 year	private	curative	33	1	2	0
1002	M	30	No	Yes	No	Adult (30-54)	3.39	Primary	No	Yes	No	No	high	<1 year	private	preventive	62	1	3	1
1003	F	30	No	Yes	No	Adult (30-54)	3.05	Primary	No	Yes	No	No	high	>1 year	private	curative	27	0	0	1
1004	F	35	No	Yes	No	Adult (30-54)	1.86	Primary	No	Yes	No	No	high	>1 year	private	preventive	2	1	2	2
1005	F	30	No	Yes	No	Adult (30-54)	3	Primary	No	Yes	No	No	high	>1 year	public	preventive	24	1	0	1
1006	M	49	No	Yes	No	Adult (30-54)	4.06	Primary	No	Yes	No	No	high	>1 year	private	curative	24	1	3	2
1007	F	35	No	Yes	No	Adult (30-54)	3.7	None	Yes	No	No	No	high	>1 year	public	curative	22	0	0	4
1008	F	35	No	Yes	No	Adult (30-54)	3.98	None	Yes	No	No	No	high	>1 year	public	curative	12	1	4	3
1009	M	40	No	Yes	No	Adult (30-54)	3.86	None	Yes	No	No	No	high	<1 year	private	preventive	18	1	0	4
1010	F	41	No	Yes	No	Adult (30-54)	3.03	None	Yes	No	No	No	high	<1 year	private	preventive	14	1	0	1
1011	F	35	No	Yes	No	Adult (30-54)	2.19	None	Yes	No	No	No	high	<1 year	private	preventive	15	0	1	1
1012	M	35	No	Yes	No	Adult (30-54)	2.67	Secondary	No	Yes	Yes	No	high	<1 year	private	preventive	25	0	1	1
1013	M	40	No	Yes	No	Adult (30-54)	3.1	Primary	No	Yes	No	No	high	<1 year	private	preventive	28	1	2	2
1014	M	41	No	Yes	No	Adult (30-54)	2.49	None	Yes	No	No	No	high	<1 year	public	preventive	29	1	1	2
1015	F	46	No	Yes	No	Adult (30-54)	3.16	Primary	No	Yes	No	No	high	<1 year	private	curative	32	1	2	4
1016	M	38	No	Yes	No	Adult (30-54)	2.59	Primary	No	Yes	No	No	high	>1 year	public	curative	33	1	4	3
1017	F	50	No	Yes	No	Adult (30-54)	2.87	Secondary	No	Yes	Yes	No	high	>1 year	public	curative	34	0	3	4
1018	F	41	No	Yes	No	Adult (30-54)	4.05	Secondary	No	Yes	Yes	No	high	>1 year	private	preventive	35	0	4	1
1019	F	32	No	Yes	No	Adult (30-54)	1.99	Secondary	No	Yes	Yes	No	high	>1 year	private	curative	54	1	1	1
1020	M	30	No	Yes	No	Adult (30-54)	2.25	None	Yes	No	No	No	high	>1 year	private	preventive	50	1	1	1
1021	F	30	No	Yes	No	Adult (30-54)	2.6	Primary	No	Yes	No	No	high	>1 year	private	preventive	28	0	1	2
1022	F	35	No	Yes	No	Adult (30-54)	3.99	Graduate	No	No	No	Yes	high	<1 year	private	curative	20	0	2	2
1023	M	30	No	Yes	No	Adult (30-54)	1.88	Graduate	No	No	No	Yes	high	<1 year	public	curative	51	1	2	2
1024	F	49	No	Yes	No	Adult (30-54)	4.05	Graduate	No	No	No	Yes	high	<1 year	private	curative	28	0	2	2
1025	F	35	No	Yes	No	Adult (30-54)	2.85	Primary	No	Yes	No	No	high	<1 year	public	preventive	31	1	2	4
1026	M	35	No	Yes	No	Adult (30-54)	3.2	Primary	No	Yes	No	No	high	<1 year	public	preventive	35	0	4	0
1027	M	40	No	Yes	No	Adult (30-54)	2.68	Secondary	No	Yes	Yes	No	high	<1 year	private	preventive	36	1	0	2
1028	M	41	No	Yes	No	Adult (30-54)	2.05	Secondary	No	Yes	Yes	No	high	<1 year	private	preventive	30	1	2	1
1029	F	35	No	Yes	No	Adult (30-54)	2.13	Secondary	No	Yes	Yes	No	high	>1 year	private	preventive	24	0	1	2
1030	M	35	No	Yes	No	Adult (30-54)	3.12	None	Yes	No	No	No	high	>1 year	private	preventive	50	1	2	2
1031	F	40	No	Yes	No	Adult (30-54)	2.44	Primary	No	Yes	No	No	high	>1 year	private	curative	25	1	2	3
1032	F	41	No	Yes	No	Adult (30-54)	2.11	None	Yes	No	No	No	high	>1 year	public	curative	14	1	3	2
1033	F	46	No	Yes	No	Adult (30-54)	3.07	None	Yes	No	No	No	high	>1 year	private	curative	24	1	2	3
1034	M	38	No	Yes	No	Adult (30-54)	1.98	Primary	No	Yes	No	No	high	>1 year	public	preventive	3	1	3	0
1035	F	50	No	Yes	No	Adult (30-54)	3.75	Primary	No	Yes	No	No	high	<1 year	public	curative	54	0	0	2
1036	F	41	No	Yes	No	Adult (30-54)	2.71	Primary	No	Yes	No	No	high	<1 year	private	preventive	70	0	2	0
1037	M	32	No	Yes	No	Adult (30-54)	3.18	Primary	No	Yes	No	No	high	<1 year	private	preventive	27	1	0	3
1038	F	30	No	Yes	No	Adult (30-54)	3.32	Primary	No	Yes	No	No	high	<1 year	private	curative	42	1	3	0
1039	F	30	No	Yes	No	Adult (30-54)	3.55	Primary	No	Yes	No	No	high	<1 year	private	curative	24	0	0	4
1040	M	35	No	Yes	No	Adult (30-54)	2.03	None	Yes	No	No	No	high	<1 year	private	curative	14	1	4	0
1041	M	30	No	Yes	No	Adult (30-54)	2.63	None	Yes	No	No	No	high	<1 year	public	preventive	16	0	0	0
1042	M	49	No	Yes	No	Adult (30-54)	3.03	None	Yes	No	No	No	high	>1 year	private	preventive	15	1	0	1
1043	F	35	No	Yes	No	Adult (30-54)	2.1	None	Yes	No	No	No	high	>1 year	public	preventive	25	0	1	1
1044	M	35	No	Yes	No	Adult (30-54)	2.53	None	Yes	No	No	No	high	>1 year	public	preventive	32	1	1	2
1045	F	40	No	Yes	No	Adult (30-54)	2.42	Secondary	No	Yes	Yes	No	high	>1 year	private	preventive	53	0	2	1
1046	F	41	No	Yes	No	Adult (30-54)	3.91	Primary	No	Yes	No	No	low	>1 year	private	preventive	24	1	1	2
1047	F	35	No	Yes	No	Adult (30-54)	3.68	None	Yes	No	No	No	low	>1 year	private	curative	3	0	2	4
1048	M	35	No	Yes	No	Adult (30-54)	1.85	Primary	No	Yes	No	No	low	<1 year	private	curative	35	0	4	3
1049	F	40	No	Yes	No	Adult (30-54)	3.37	Primary	No	Yes	No	No	low	<1 year	private	curative	21	1	3	4
1050	F	41	No	Yes	No	Adult (30-54)	2.62	Secondary	No	Yes	Yes	No	low	<1 year	public	preventive	22	0	4	1
1051	M	46	No	Yes	No	Adult (30-54)	4.15	Secondary	No	Yes	Yes	No	low	<1 year	private	curative	23	0	1	1
1052	F	38	No	Yes	No	Adult (30-54)	2.75	Secondary	No	Yes	Yes	No	low	<1 year	public	preventive	33	0	1	1
1053	F	50	No	Yes	No	Adult (30-54)	2.9	None	Yes	No	No	No	low	<1 year	public	preventive	62	0	1	2
1054	M	41	No	Yes	No	Adult (30-54)	3.09	Primary	No	Yes	No	No	low	<1 year	private	curative	27	0	2	2
1055	M	32	No	Yes	No	Adult (30-54)	3.08	Graduate	No	No	No	Yes	low	>1 year	private	curative	2	0	2	2
1056	M	30	No	Yes	No	Adult (30-54)	3.15	Graduate	No	No	No	Yes	low	>1 year	private	curative	24	1	2	2
1057	F	30	No	Yes	No	Adult (30-54)	3.15	Graduate	No	No	No	Yes	low	>1 year	private	preventive	24	0	2	4
1058	M	35	No	Yes	No	Adult (30-54)	3.17	None	Yes	No	No	No	low	>1 year	private	preventive	22	0	4	0
1059	F	30	No	Yes	No	Adult (30-54)	2.95	Primary	No	Yes	No	No	low	>1 year	public	preventive	12	0	0	2
1060	F	49	No	Yes	No	Adult (30-54)	2.72	Graduate	No	No	No	Yes	low	>1 year	private	preventive	18	1	2	1
1061	F	35	No	Yes	No	Adult (30-54)	4.06	Graduate	No	No	No	Yes	low	<1 year	public	preventive	14	0	1	2
1062	M	35	No	Yes	No	Adult (30-54)	4.1	Graduate	No	No	No	Yes	low	<1 year	public	preventive	15	0	2	2
1063	F	40	No	Yes	No	Adult (30-54)	2.57	Primary	No	Yes	No	No	low	<1 year	private	curative	25	1	2	3
1064	F	41	No	Yes	No	Adult (30-54)	3.22	Primary	No	Yes	No	No	low	<1 year	private	curative	28	0	3	2
1065	M	35	No	Yes	No	Adult (30-54)	2.2	Secondary	No	Yes	Yes	No	low	<1 year	private	curative	29	0	2	3
1066	F	35	No	Yes	No	Adult (30-54)	2.43	Secondary	No	Yes	Yes	No	low	>1 year	private	preventive	32	0	3	0
1067	F	40	No	Yes	No	Adult (30-54)	3.25	Secondary	No	Yes	Yes	No	low	>1 year	private	curative	33	1	0	2
1068	M	41	No	Yes	No	Adult (30-54)	3.65	None	Yes	No	No	No	low	>1 year	public	preventive	34	0	2	0
1069	M	46	No	Yes	No	Adult (30-54)	2.81	Primary	No	Yes	No	No	low	>1 year	private	preventive	35	1	0	3
1070	M	38	No	Yes	No	Adult (30-54)	3.58	None	Yes	No	No	No	low	>1 year	public	curative	54	0	3	0
1071	F	50	No	Yes	No	Adult (30-54)	2.28	None	Yes	No	No	No	low	>1 year	public	curative	50	0	0	4
1072	M	41	No	Yes	No	Adult (30-54)	2.87	Primary	No	Yes	No	No	low	<1 year	private	curative	28	0	4	0
1073	F	32	No	Yes	No	Adult (30-54)	1.91	Primary	No	Yes	No	No	low	<1 year	private	preventive	20	0	0	0
1074	F	30	No	Yes	No	Adult (30-54)	1.89	Primary	No	Yes	No	No	low	<1 year	private	preventive	51	0	0	1
1075	F	30	No	Yes	No	Adult (30-54)	3.6	Primary	No	Yes	No	No	low	<1 year	private	preventive	28	0	1	1
1076	M	35	No	Yes	No	Adult (30-54)	3.6	Primary	No	Yes	No	No	low	<1 year	private	preventive	31	0	1	2
1077	F	30	No	Yes	No	Adult (30-54)	2.02	Primary	No	Yes	No	No	low	<1 year	public	preventive	35	0	2	1
1078	F	49	No	Yes	No	Adult (30-54)	3.83	None	Yes	No	No	No	low	<1 year	private	preventive	36	0	1	2
1079	M	35	No	Yes	No	Adult (30-54)	3.38	None	Yes	No	No	No	low	>1 year	public	curative	30	0	2	4
1080	F	35	No	Yes	No	Adult (30-54)	3.6	None	Yes	No	No	No	low	>1 year	public	curative	24	0	4	3
1081	F	40	No	Yes	No	Adult (30-54)	2.64	None	Yes	No	No	No	low	>1 year	private	curative	50	0	3	4
1082	M	41	No	Yes	No	Adult (30-54)	1.89	None	Yes	No	No	No	low	>1 year	private	preventive	25	0	4	1
1083	M	35	No	Yes	No	Adult (30-54)	3.43	Secondary	No	Yes	Yes	No	low	>1 year	private	curative	14	0	1	1
1084	M	35	No	Yes	No	Adult (30-54)	3	Primary	No	Yes	No	No	low	>1 year	private	preventive	24	0	1	1
1085	F	40	No	Yes	No	Adult (30-54)	2.28	None	Yes	No	No	No	low	<1 year	private	preventive	3	0	1	2
1086	M	41	No	Yes	No	Adult (30-54)	4.14	Primary	No	Yes	No	No	low	<1 year	public	curative	54	0	2	2
1087	F	46	No	Yes	No	Adult (30-54)	3.52	Primary	No	Yes	No	No	low	<1 year	private	curative	70	1	2	2
1088	F	38	No	Yes	No	Adult (30-54)	2.68	Secondary	No	Yes	Yes	No	low	<1 year	public	curative	27	1	2	2
1089	F	50	No	Yes	No	Adult (30-54)	2.08	Secondary	No	Yes	Yes	No	low	<1 year	public	preventive	42	0	2	4
1090	M	41	No	Yes	No	Adult (30-54)	1.85	Secondary	No	Yes	Yes	No	low	<1 year	private	preventive	24	1	4	0
1091	F	32	No	Yes	No	Adult (30-54)	1.83	None	Yes	No	No	No	low	<1 year	private	preventive	14	1	0	2
1092	F	30	No	Yes	No	Adult (30-54)	3.6	Primary	No	Yes	No	No	low	>1 year	private	preventive	16	1	2	1
1093	M	30	No	Yes	No	Adult (30-54)	3.22	Graduate	No	No	No	Yes	low	>1 year	private	preventive	15	0	1	2
1094	F	35	No	Yes	No	Adult (30-54)	2.63	Graduate	No	No	No	Yes	low	>1 year	private	preventive	25	1	2	2
1095	F	30	No	Yes	No	Adult (30-54)	3.18	Graduate	No	No	No	Yes	low	>1 year	public	curative	32	1	2	3
1096	M	49	No	Yes	No	Adult (30-54)	2.59	Primary	No	Yes	No	No	low	>1 year	private	curative	53	0	3	2
1097	M	35	No	Yes	No	Adult (30-54)	3.2	Primary	No	Yes	No	No	low	>1 year	public	curative	24	1	2	3
1098	M	35	No	Yes	No	Adult (30-54)	3.58	Secondary	No	Yes	Yes	No	low	<1 year	public	preventive	3	1	3	0
1099	F	40	No	Yes	No	Adult (30-54)	2.48	Secondary	No	Yes	Yes	No	low	<1 year	private	curative	35	1	0	2
1100	M	41	No	Yes	No	Adult (30-54)	3.11	Secondary	No	Yes	Yes	No	low	<1 year	private	preventive	21	0	2	0
1101	F	35	No	Yes	No	Adult (30-54)	4.1	None	Yes	No	No	No	low	<1 year	private	preventive	22	1	0	3
1102	F	35	No	Yes	No	Adult (30-54)	3.96	Primary	No	Yes	No	No	low	<1 year	private	curative	23	1	3	0
1103	F	40	No	Yes	No	Adult (30-54)	3.78	None	Yes	No	No	No	low	<1 year	private	curative	33	1	0	4
1104	M	41	No	Yes	No	Adult (30-54)	2.35	None	Yes	No	No	No	low	<1 year	public	curative	62	0	4	0
1105	F	46	No	Yes	No	Adult (30-54)	2.61	Primary	No	Yes	No	No	low	>1 year	private	preventive	27	1	0	0
1106	F	38	No	Yes	No	Adult (30-54)	3.92	Primary	No	Yes	No	No	low	>1 year	public	preventive	2	1	0	1
1107	M	50	No	Yes	No	Adult (30-54)	2.56	Primary	No	Yes	No	No	low	>1 year	public	preventive	24	1	1	1
1108	F	41	No	Yes	No	Adult (30-54)	2.01	Primary	No	Yes	No	No	low	>1 year	private	preventive	24	0	1	2
1109	F	32	No	Yes	No	Adult (30-54)	3.6	Primary	No	Yes	No	No	low	>1 year	private	preventive	22	1	2	1
1110	M	30	No	Yes	No	Adult (30-54)	3.37	Primary	No	Yes	No	No	low	>1 year	private	preventive	12	1	1	2
1111	M	30	No	Yes	No	Adult (30-54)	1.84	None	Yes	No	No	No	low	<1 year	private	curative	18	1	2	4
1112	M	35	No	Yes	No	Adult (30-54)	2.25	None	Yes	No	No	No	low	<1 year	private	curative	14	0	4	3
1113	F	30	No	Yes	No	Adult (30-54)	1.97	None	Yes	No	No	No	low	<1 year	public	curative	15	0	3	4
1114	M	49	No	Yes	No	Adult (30-54)	3.23	None	Yes	No	No	No	low	<1 year	private	preventive	25	1	4	1
1115	F	35	No	Yes	No	Adult (30-54)	3.87	None	Yes	No	No	No	low	<1 year	public	curative	28	1	1	1
1116	F	35	No	Yes	No	Adult (30-54)	3.5	Secondary	No	Yes	Yes	No	low	<1 year	public	preventive	29	1	1	1
1117	F	40	No	Yes	No	Adult (30-54)	1.88	Primary	No	Yes	No	No	low	<1 year	private	preventive	32	1	1	2
1118	M	41	No	Yes	No	Adult (30-54)	3.39	None	Yes	No	No	No	low	>1 year	private	curative	33	0	2	2
1119	F	35	No	Yes	No	Adult (30-54)	3.29	Primary	No	Yes	No	No	low	>1 year	private	curative	34	0	2	4
1120	F	35	No	Yes	No	Adult (30-54)	4.13	Primary	No	Yes	No	No	low	>1 year	private	curative	35	1	2	3
1121	M	40	No	Yes	No	Adult (30-54)	2.81	Secondary	No	Yes	Yes	No	low	>1 year	private	preventive	54	1	2	4
1122	F	41	No	Yes	No	Adult (30-54)	2.13	Secondary	No	Yes	Yes	No	low	>1 year	public	preventive	50	0	4	1
1123	F	46	No	Yes	No	Adult (30-54)	4	Secondary	No	Yes	Yes	No	low	>1 year	private	preventive	28	0	0	1
1124	M	38	No	Yes	No	Adult (30-54)	2.29	None	Yes	No	No	No	low	<1 year	public	preventive	20	1	2	1
1125	M	50	No	Yes	No	Adult (30-54)	2.83	Primary	No	Yes	No	No	low	<1 year	public	preventive	51	0	1	2
1126	M	41	No	Yes	No	Adult (30-54)	3.37	Graduate	No	No	No	Yes	low	<1 year	private	preventive	28	1	2	2
1127	F	32	No	Yes	No	Adult (30-54)	3.89	Graduate	No	No	No	Yes	low	<1 year	private	curative	31	0	2	2
1128	M	30	No	Yes	No	Adult (30-54)	3.93	Graduate	No	No	No	Yes	low	<1 year	private	curative	35	1	3	2
1129	F	30	No	Yes	No	Adult (30-54)	3.33	Primary	No	Yes	No	No	low	<1 year	private	curative	36	1	2	4
1130	F	35	No	Yes	No	Adult (30-54)	1.9	Primary	No	Yes	No	No	low	<1 year	private	preventive	30	0	3	0
1131	F	30	No	Yes	No	Adult (30-54)	3.72	Secondary	No	Yes	Yes	No	low	>1 year	public	curative	24	1	0	2
1132	M	49	No	Yes	No	Adult (30-54)	2.78	Secondary	No	Yes	Yes	No	low	>1 year	private	preventive	50	1	2	1
1133	F	35	No	Yes	No	Adult (30-54)	3.74	Secondary	No	Yes	Yes	No	low	>1 year	public	preventive	25	1	0	2
1134	F	35	No	Yes	No	Adult (30-54)	3.8	None	Yes	No	No	No	low	>1 year	public	curative	14	1	3	2
1135	M	40	No	Yes	No	Adult (30-54)	2.35	Primary	No	Yes	No	No	low	>1 year	private	curative	24	1	0	3
1136	F	41	No	Yes	No	Adult (30-54)	2.18	None	Yes	No	No	No	low	>1 year	private	curative	3	0	4	2
1137	F	35	No	Yes	No	Adult (30-54)	1.96	None	Yes	No	No	No	low	<1 year	private	preventive	54	0	0	3
1138	M	35	No	Yes	No	Adult (30-54)	2.68	Primary	No	Yes	No	No	low	<1 year	private	preventive	70	1	0	0
1139	M	40	No	Yes	No	Adult (30-54)	2.9	Primary	No	Yes	No	No	low	<1 year	private	preventive	27	1	1	2
1140	M	41	No	Yes	No	Adult (30-54)	2.18	Primary	No	Yes	No	No	low	<1 year	public	preventive	42	0	1	0
1141	F	46	No	Yes	No	Adult (30-54)	3.3	Primary	No	Yes	No	No	low	<1 year	private	preventive	24	1	2	3
1142	M	38	No	Yes	No	Adult (30-54)	3.1	Primary	No	Yes	No	No	low	>1 year	public	preventive	14	0	1	0
1143	F	50	No	Yes	No	Adult (30-54)	2.64	Primary	No	Yes	No	No	low	>1 year	public	curative	16	1	2	4
1144	F	41	No	Yes	No	Adult (30-54)	3.51	None	Yes	No	No	No	low	>1 year	private	curative	15	0	4	0
1145	F	32	No	Yes	No	Adult (30-54)	1.89	None	Yes	No	No	No	low	>1 year	private	curative	25	1	3	0
1146	M	30	No	Yes	No	Adult (30-54)	3.86	None	Yes	No	No	No	low	>1 year	private	preventive	32	0	4	1
1147	F	30	No	Yes	No	Adult (30-54)	2.67	None	Yes	No	No	No	low	>1 year	private	curative	53	1	1	1
1148	F	35	No	Yes	No	Adult (30-54)	1.97	None	Yes	No	No	No	low	<1 year	private	preventive	24	0	1	2
1149	M	30	No	Yes	No	Adult (30-54)	1.87	Secondary	No	Yes	Yes	No	low	<1 year	public	preventive	3	0	1	1
1150	F	49	No	Yes	No	Adult (30-54)	2.43	Primary	No	Yes	No	No	low	<1 year	private	curative	35	1	2	2
1151	F	35	No	Yes	No	Adult (30-54)	2.72	None	Yes	No	No	No	low	<1 year	public	curative	21	1	2	4
1152	M	35	No	Yes	No	Adult (30-54)	2.73	Primary	No	Yes	No	No	low	<1 year	public	curative	22	0	2	3
1153	M	40	No	Yes	No	Adult (30-54)	1.87	Primary	No	Yes	No	No	low	<1 year	private	preventive	23	1	2	4
1154	M	41	No	Yes	No	Adult (30-54)	2.72	Secondary	No	Yes	Yes	No	low	<1 year	private	preventive	33	1	4	1
1155	F	35	No	Yes	No	Adult (30-54)	2.28	Secondary	No	Yes	Yes	No	low	>1 year	private	preventive	62	0	0	1
1156	M	35	No	Yes	No	Adult (30-54)	2.09	Secondary	No	Yes	Yes	No	low	>1 year	private	preventive	27	1	2	1
1157	F	40	No	Yes	No	Adult (30-54)	4.01	None	Yes	No	No	No	low	>1 year	private	preventive	2	1	1	2
1158	F	41	No	Yes	No	Adult (30-54)	3.85	Primary	No	Yes	No	No	low	>1 year	public	preventive	24	1	2	2
1159	F	46	No	Yes	No	Adult (30-54)	3.08	Graduate	No	No	No	Yes	low	>1 year	private	curative	24	0	2	2
1160	M	38	No	Yes	No	Adult (30-54)	3.56	Graduate	No	No	No	Yes	low	>1 year	public	curative	22	1	3	2
1161	F	50	No	Yes	No	Adult (30-54)	2.2	Graduate	No	No	No	Yes	low	<1 year	public	curative	12	1	2	4
1162	F	41	No	Yes	No	Adult (30-54)	3.45	Primary	No	Yes	No	No	low	<1 year	private	preventive	18	1	3	0
1163	M	32	No	Yes	No	Adult (30-54)	2.77	Primary	No	Yes	No	No	low	<1 year	private	curative	14	0	0	2
1164	F	30	No	Yes	No	Adult (30-54)	2.4	Secondary	No	Yes	Yes	No	low	<1 year	private	preventive	15	1	2	1
1165	F	30	No	Yes	No	Adult (30-54)	2.67	Secondary	No	Yes	Yes	No	low	<1 year	private	preventive	25	1	0	2
1166	M	35	No	Yes	No	Adult (30-54)	2.37	Secondary	No	Yes	Yes	No	low	<1 year	private	curative	28	1	3	2
1167	M	30	No	Yes	No	Adult (30-54)	3.11	None	Yes	No	No	No	low	<1 year	public	curative	29	0	0	3
1168	M	49	No	Yes	No	Adult (30-54)	2.87	Primary	No	Yes	No	No	low	>1 year	private	curative	32	1	4	2
1169	F	35	No	Yes	No	Adult (30-54)	3.95	None	Yes	No	No	No	low	>1 year	public	preventive	33	1	0	3
1170	M	35	No	Yes	No	Adult (30-54)	2.35	None	Yes	No	No	No	low	>1 year	public	preventive	34	1	0	0
1171	F	40	No	Yes	No	Adult (30-54)	2.52	Primary	No	Yes	No	No	low	>1 year	private	preventive	35	0	1	2
1172	F	41	No	Yes	No	Adult (30-54)	3.15	Primary	No	Yes	No	No	low	>1 year	private	preventive	54	0	1	0
1173	F	35	No	Yes	No	Adult (30-54)	3.55	Primary	No	Yes	No	No	low	>1 year	private	preventive	50	1	2	3
1174	M	35	No	Yes	No	Adult (30-54)	3.4	Primary	No	Yes	No	No	low	<1 year	private	preventive	28	1	1	0
1175	F	40	No	Yes	No	Adult (30-54)	2.64	Primary	No	Yes	No	No	low	<1 year	private	curative	20	1	2	4
1176	F	41	No	Yes	No	Adult (30-54)	3.07	Primary	No	Yes	No	No	low	<1 year	public	curative	51	1	4	0
1177	M	46	No	Yes	No	Adult (30-54)	3.08	None	Yes	No	No	No	low	<1 year	private	curative	28	0	3	0
1178	F	38	No	Yes	No	Adult (30-54)	3.05	None	Yes	No	No	No	low	<1 year	public	preventive	31	0	4	1
1179	F	50	No	Yes	No	Adult (30-54)	2.01	None	Yes	No	No	No	low	<1 year	public	curative	35	1	1	1
1180	M	41	No	Yes	No	Adult (30-54)	1.99	None	Yes	No	No	No	low	<1 year	private	preventive	36	1	1	2
1181	M	32	No	Yes	No	Adult (30-54)	3.6	None	Yes	No	No	No	low	>1 year	private	preventive	30	0	1	1
1182	M	30	No	Yes	No	Adult (30-54)	2	Secondary	No	Yes	Yes	No	low	>1 year	private	curative	24	0	2	2
1183	F	30	No	Yes	No	Adult (30-54)	2.59	Primary	No	Yes	No	No	low	>1 year	private	curative	50	1	2	4
1184	M	35	No	Yes	No	Adult (30-54)	2.98	None	Yes	No	No	No	low	>1 year	private	curative	25	0	2	3
1185	F	30	No	Yes	No	Adult (30-54)	2.7	Primary	No	Yes	No	No	low	>1 year	public	preventive	14	1	2	4
1186	F	49	No	Yes	No	Adult (30-54)	2.59	Primary	No	Yes	No	No	low	>1 year	private	preventive	24	0	4	1
1187	F	35	No	Yes	No	Adult (30-54)	2.28	Secondary	No	Yes	Yes	No	low	<1 year	public	preventive	3	1	0	1
1188	M	35	No	Yes	No	Adult (30-54)	3.81	Secondary	No	Yes	Yes	No	low	<1 year	public	preventive	54	1	2	1
1189	F	40	No	Yes	No	Adult (30-54)	2.67	Secondary	No	Yes	Yes	No	low	<1 year	private	preventive	70	0	1	2
1190	F	41	No	Yes	No	Adult (30-54)	3.7	None	Yes	No	No	No	low	<1 year	private	preventive	27	1	2	2
1191	M	35	No	Yes	No	Adult (30-54)	4.12	Primary	No	Yes	No	No	low	<1 year	private	curative	42	1	2	2
1192	F	35	No	Yes	No	Adult (30-54)	3.84	Graduate	No	No	No	Yes	low	<1 year	private	curative	24	1	3	2
1193	F	40	No	Yes	No	Adult (30-54)	2.43	Graduate	No	No	No	Yes	low	<1 year	private	curative	14	1	2	4
1194	M	41	No	Yes	No	Adult (30-54)	2.08	Graduate	No	No	No	Yes	low	>1 year	public	preventive	16	1	3	0
1195	M	46	No	Yes	No	Adult (30-54)	4.02	Primary	No	Yes	No	No	low	>1 year	private	curative	15	0	0	2
1196	M	38	No	Yes	No	Adult (30-54)	4.03	Primary	No	Yes	No	No	low	>1 year	public	preventive	25	0	2	1
1197	F	50	No	Yes	No	Adult (30-54)	2.12	Secondary	No	Yes	Yes	No	low	>1 year	public	preventive	32	1	0	2
1198	M	41	No	Yes	No	Adult (30-54)	3.22	Secondary	No	Yes	Yes	No	low	>1 year	private	curative	53	1	3	2
1199	F	32	No	Yes	No	Adult (30-54)	4.16	Secondary	No	Yes	Yes	No	low	>1 year	private	curative	24	0	0	3
1200	F	30	No	Yes	No	Adult (30-54)	2.76	None	Yes	No	No	No	low	<1 year	private	curative	3	1	4	2
1201	F	30	No	Yes	No	Adult (30-54)	2.86	Primary	No	Yes	No	No	low	<1 year	private	preventive	35	0	0	3
1202	M	35	No	Yes	No	Adult (30-54)	3.69	None	Yes	No	No	No	low	<1 year	private	preventive	21	1	0	0
1203	F	30	No	Yes	No	Adult (30-54)	3.06	None	Yes	No	No	No	low	<1 year	public	preventive	22	0	1	2
1204	F	49	No	Yes	No	Adult (30-54)	1.86	Primary	No	Yes	No	No	low	<1 year	private	preventive	23	1	1	0
1205	M	35	No	Yes	No	Adult (30-54)	2.59	Primary	No	Yes	No	No	low	<1 year	public	preventive	33	0	2	3
1206	F	35	No	Yes	No	Adult (30-54)	2.28	Primary	No	Yes	No	No	low	<1 year	public	preventive	62	1	1	0
1207	F	40	No	Yes	No	Adult (30-54)	3.66	Primary	No	Yes	No	No	low	>1 year	private	curative	27	0	2	4
1208	M	41	No	Yes	No	Adult (30-54)	3.23	Primary	No	Yes	No	No	low	>1 year	private	curative	2	0	4	0
1209	M	35	No	Yes	No	Adult (30-54)	3.03	Primary	No	Yes	No	No	low	>1 year	private	curative	24	1	3	0
1210	M	35	No	Yes	No	Adult (30-54)	4.14	None	Yes	No	No	No	low	>1 year	private	preventive	24	0	4	1
1211	F	40	No	Yes	No	Adult (30-54)	2.3	None	Yes	No	No	No	low	>1 year	private	curative	22	0	1	1
1212	M	41	No	Yes	No	Adult (30-54)	2.08	None	Yes	No	No	No	low	>1 year	public	preventive	12	0	1	2
1213	F	46	No	Yes	No	Adult (30-54)	2.66	None	Yes	No	No	No	low	<1 year	private	preventive	18	0	1	1
1214	F	38	No	Yes	No	Adult (30-54)	2.66	None	Yes	No	No	No	low	<1 year	public	curative	14	0	2	2
1215	F	50	No	Yes	No	Adult (30-54)	2.27	Secondary	No	Yes	Yes	No	low	<1 year	public	curative	15	0	2	4
1216	M	41	No	Yes	No	Adult (30-54)	4.04	Primary	No	Yes	No	No	low	<1 year	private	curative	25	1	2	3
1217	F	32	No	Yes	No	Adult (30-54)	2.07	None	Yes	No	No	No	low	<1 year	private	preventive	28	0	2	4
1218	F	30	No	Yes	No	Adult (30-54)	2.69	Primary	No	Yes	No	No	low	>1 year	private	preventive	29	0	4	1
1219	M	30	No	Yes	No	Adult (30-54)	3.58	Primary	No	Yes	No	No	low	>1 year	private	preventive	32	0	0	1
1220	F	35	No	Yes	No	Adult (30-54)	4.11	Secondary	No	Yes	Yes	No	low	>1 year	private	preventive	33	1	2	1
1221	F	30	No	Yes	No	Adult (30-54)	2.2	Secondary	No	Yes	Yes	No	low	>1 year	public	preventive	34	0	1	2
1222	M	49	No	Yes	No	Adult (30-54)	3.91	Secondary	No	Yes	Yes	No	low	>1 year	private	preventive	35	0	2	2
1223	M	35	No	Yes	No	Adult (30-54)	2.81	None	Yes	No	No	No	low	>1 year	public	curative	54	1	2	4
1224	M	35	No	Yes	No	Adult (30-54)	1.98	Primary	No	Yes	No	No	low	<1 year	public	curative	50	0	3	3
1225	F	40	No	Yes	No	Adult (30-54)	3.93	Graduate	No	No	No	Yes	low	<1 year	private	curative	28	0	2	4
1226	M	41	No	Yes	No	Adult (30-54)	3.13	Graduate	No	No	No	Yes	low	<1 year	private	preventive	20	0	3	1
1227	F	35	No	Yes	No	Adult (30-54)	2.44	Graduate	No	No	No	Yes	low	<1 year	private	curative	51	1	0	1
1228	F	35	No	Yes	No	Adult (30-54)	2.9	Primary	No	Yes	No	No	low	<1 year	private	preventive	28	0	2	1
1229	F	40	No	Yes	No	Adult (30-54)	2.57	Primary	No	Yes	No	No	low	<1 year	private	preventive	31	1	0	2
1230	M	41	No	Yes	No	Adult (30-54)	2.17	Secondary	No	Yes	Yes	No	low	<1 year	public	curative	35	0	3	2
1231	F	46	No	Yes	No	Adult (30-54)	4.06	Secondary	No	Yes	Yes	No	low	>1 year	private	curative	36	0	0	2
1232	F	38	No	Yes	No	Adult (30-54)	2.94	Secondary	No	Yes	Yes	No	low	>1 year	public	curative	30	0	4	2
1233	M	50	No	Yes	No	Adult (30-54)	2.68	None	Yes	No	No	No	low	>1 year	public	preventive	24	0	0	4
1234	F	41	No	Yes	No	Adult (30-54)	3.9	Primary	No	Yes	No	No	low	>1 year	private	preventive	50	0	0	0
1235	F	32	No	Yes	No	Adult (30-54)	4	None	Yes	No	No	No	low	>1 year	private	preventive	25	0	1	2
1236	M	30	No	Yes	No	Adult (30-54)	3.2	None	Yes	No	No	No	low	>1 year	private	preventive	14	0	1	1
1237	M	30	No	Yes	No	Adult (30-54)	3.13	Primary	No	Yes	No	No	low	<1 year	private	preventive	24	0	2	2
1238	M	35	No	Yes	No	Adult (30-54)	2.96	Primary	No	Yes	No	No	low	<1 year	private	preventive	3	0	1	2
1239	F	30	No	Yes	No	Adult (30-54)	2.46	Primary	No	Yes	No	No	low	<1 year	public	curative	54	0	2	3
1240	M	49	No	Yes	No	Adult (30-54)	2.7	Primary	No	Yes	No	No	low	<1 year	private	curative	70	0	4	2
1241	F	35	No	Yes	No	Adult (30-54)	2.08	Primary	No	Yes	No	No	low	<1 year	public	curative	27	0	3	3
1242	F	35	No	Yes	No	Adult (30-54)	2.34	Primary	No	Yes	No	No	low	<1 year	public	preventive	42	0	4	0
1243	F	40	No	Yes	No	Adult (30-54)	3.71	None	Yes	No	No	No	low	<1 year	private	curative	24	0	1	2
1244	M	41	No	Yes	No	Adult (30-54)	3.07	None	Yes	No	No	No	low	>1 year	private	preventive	14	0	1	0
1245	F	35	No	Yes	No	Adult (30-54)	1.99	None	Yes	No	No	No	low	>1 year	private	preventive	16	0	1	3
1246	F	35	No	Yes	No	Adult (30-54)	3.26	None	Yes	No	No	No	low	>1 year	private	curative	15	0	2	0
1247	M	40	No	Yes	No	Adult (30-54)	2.59	None	Yes	No	No	No	low	>1 year	private	curative	25	1	2	4
1248	F	41	No	Yes	No	Adult (30-54)	2.22	Secondary	No	Yes	Yes	No	low	>1 year	public	curative	32	1	2	0
1249	F	46	No	Yes	No	Adult (30-54)	4	Primary	No	Yes	No	No	low	>1 year	private	preventive	53	0	2	0
1250	M	38	No	Yes	No	Adult (30-54)	2.76	None	Yes	No	No	No	low	<1 year	public	preventive	24	1	4	1
1251	M	50	No	Yes	No	Adult (30-54)	4.11	Primary	No	Yes	No	No	low	<1 year	public	preventive	3	1	0	1
1252	M	41	No	Yes	No	Adult (30-54)	2.29	Primary	No	Yes	No	No	low	<1 year	private	preventive	35	1	2	2
1253	F	32	No	Yes	No	Adult (30-54)	2.66	Secondary	No	Yes	Yes	No	low	<1 year	private	preventive	21	0	1	1
1254	M	30	No	Yes	No	Adult (30-54)	3.46	Secondary	No	Yes	Yes	No	low	<1 year	private	preventive	22	1	2	2
1255	F	30	No	Yes	No	Adult (30-54)	3.61	Secondary	No	Yes	Yes	No	low	<1 year	private	curative	23	1	2	4
1256	F	35	No	Yes	No	Adult (30-54)	3.79	None	Yes	No	No	No	low	<1 year	private	curative	33	0	3	3
1257	F	30	No	Yes	No	Adult (30-54)	2.89	Primary	No	Yes	No	No	low	>1 year	public	curative	62	1	2	4
1258	M	49	No	Yes	No	Adult (30-54)	3.72	Graduate	No	No	No	Yes	low	>1 year	private	preventive	27	1	3	1
1259	F	35	No	Yes	No	Adult (30-54)	2.77	Graduate	No	No	No	Yes	low	>1 year	public	curative	2	1	0	1
1260	F	35	No	Yes	No	Adult (30-54)	3.82	Graduate	No	No	No	Yes	low	>1 year	public	preventive	24	0	2	1
1261	M	40	No	Yes	No	Adult (30-54)	2.01	Primary	No	Yes	No	No	low	>1 year	private	preventive	24	1	0	2
1262	F	41	No	Yes	No	Adult (30-54)	2.08	Primary	No	Yes	No	No	low	>1 year	private	curative	22	1	3	2
1263	F	35	No	Yes	No	Adult (30-54)	3.28	Secondary	No	Yes	Yes	No	low	<1 year	private	curative	12	1	0	2
1264	M	35	No	Yes	No	Adult (30-54)	2.32	Secondary	No	Yes	Yes	No	low	<1 year	private	curative	18	0	4	2
1265	M	40	No	Yes	No	Adult (30-54)	2.45	Secondary	No	Yes	Yes	No	low	<1 year	private	preventive	14	1	0	4
1266	M	41	No	Yes	No	Adult (30-54)	3.56	None	Yes	No	No	No	low	<1 year	public	preventive	15	1	0	0
1267	F	46	No	Yes	No	Adult (30-54)	3.58	Primary	No	Yes	No	No	low	<1 year	private	preventive	25	1	1	2
1268	M	38	No	Yes	No	Adult (30-54)	4.19	None	Yes	No	No	No	low	<1 year	public	preventive	28	0	1	1
1269	F	50	No	Yes	No	Adult (30-54)	2.66	None	Yes	No	No	No	low	<1 year	public	preventive	29	1	2	2
1270	F	41	No	Yes	No	Adult (30-54)	3.83	Primary	No	Yes	No	No	low	>1 year	private	preventive	32	1	1	2
1271	F	32	No	Yes	No	Adult (30-54)	3.63	Primary	No	Yes	No	No	low	>1 year	private	curative	33	1	2	3
1272	M	30	No	Yes	No	Adult (30-54)	2.56	Primary	No	Yes	No	No	low	>1 year	private	curative	34	0	4	2
1273	F	30	No	Yes	No	Adult (30-54)	1.84	Primary	No	Yes	No	No	low	>1 year	private	curative	35	0	3	3
1274	F	35	No	Yes	No	Adult (30-54)	3.87	Primary	No	Yes	No	No	low	>1 year	private	preventive	54	1	4	0
1275	M	30	No	Yes	No	Adult (30-54)	3.48	Primary	No	Yes	No	No	low	>1 year	public	curative	50	1	1	2
1276	F	49	No	Yes	No	Adult (30-54)	4.13	None	Yes	No	No	No	low	<1 year	private	preventive	28	1	1	0
1277	F	35	No	Yes	No	Adult (30-54)	2.41	None	Yes	No	No	No	low	<1 year	public	preventive	20	1	1	3
1278	M	35	No	Yes	No	Adult (30-54)	3.71	None	Yes	No	No	No	low	<1 year	public	curative	51	0	2	0
1279	M	40	No	Yes	No	Adult (30-54)	1.94	None	Yes	No	No	No	low	<1 year	private	curative	28	0	2	4
1280	M	41	No	Yes	No	Adult (30-54)	3.97	None	Yes	No	No	No	low	<1 year	private	curative	31	1	4	0
1281	F	35	No	Yes	No	Adult (30-54)	4.12	Secondary	No	Yes	Yes	No	low	<1 year	private	preventive	35	1	3	0
1282	M	35	No	Yes	No	Adult (30-54)	2.57	Primary	No	Yes	No	No	low	<1 year	private	preventive	36	0	4	1
1283	F	40	No	Yes	No	Adult (30-54)	3.56	None	Yes	No	No	No	low	>1 year	private	preventive	30	0	1	1
1284	F	41	No	Yes	No	Adult (30-54)	1.96	Primary	No	Yes	No	No	low	>1 year	public	preventive	24	1	1	2
1285	F	46	No	Yes	No	Adult (30-54)	2.63	Primary	No	Yes	No	No	low	>1 year	private	preventive	50	0	1	1
1286	M	55	No	No	Yes	Older Adult (55-70)	6.53	Secondary	No	Yes	Yes	No	low	>1 year	public	preventive	25	1	2	2
1287	F	55	No	No	Yes	Older Adult (55-70)	3.11	Secondary	No	Yes	Yes	No	low	>1 year	public	curative	14	0	2	4
1288	F	57	No	No	Yes	Older Adult (55-70)	3.36	Secondary	No	Yes	Yes	No	low	>1 year	private	curative	24	1	2	3
1289	M	56	No	No	Yes	Older Adult (55-70)	6.11	None	Yes	No	No	No	low	<1 year	private	curative	3	1	2	4
1290	F	55	No	No	Yes	Older Adult (55-70)	1	Primary	No	Yes	No	No	low	<1 year	private	preventive	54	0	4	1
1291	F	58	No	No	Yes	Older Adult (55-70)	5.25	Graduate	No	No	No	Yes	low	<1 year	private	curative	70	1	0	1
1292	M	60	No	No	Yes	Older Adult (55-70)	4.69	Graduate	No	No	No	Yes	low	<1 year	private	preventive	27	1	2	1
1293	M	60	No	No	Yes	Older Adult (55-70)	3.86	Graduate	No	No	No	Yes	low	<1 year	public	preventive	42	1	1	2
1294	M	60	No	No	Yes	Older Adult (55-70)	4.29	Primary	No	Yes	No	No	low	>1 year	private	curative	24	1	2	2
1295	F	58	No	No	Yes	Older Adult (55-70)	2.81	Primary	No	Yes	No	No	low	>1 year	public	curative	14	1	2	2
1296	M	55	No	No	Yes	Older Adult (55-70)	3.8	Secondary	No	Yes	Yes	No	low	>1 year	public	curative	16	0	3	2
1297	F	55	No	No	Yes	Older Adult (55-70)	4.81	Secondary	No	Yes	Yes	No	low	>1 year	private	preventive	15	0	2	4
1298	F	57	No	No	Yes	Older Adult (55-70)	1.57	Secondary	No	Yes	Yes	No	low	>1 year	private	preventive	25	1	3	0
1299	F	55	No	No	Yes	Older Adult (55-70)	5.98	None	Yes	No	No	No	low	>1 year	private	preventive	32	1	0	2
1300	M	55	No	No	Yes	Older Adult (55-70)	5.11	Primary	No	Yes	No	No	low	<1 year	private	preventive	53	0	2	1
1301	F	57	No	No	Yes	Older Adult (55-70)	2.41	None	Yes	No	No	No	low	<1 year	private	preventive	24	1	0	2
1302	F	56	No	No	Yes	Older Adult (55-70)	1.07	None	Yes	No	No	No	low	<1 year	public	preventive	3	0	3	2
1303	M	55	No	No	Yes	Older Adult (55-70)	3.15	Primary	No	Yes	No	No	low	<1 year	private	curative	35	1	0	3
1304	F	58	No	No	Yes	Older Adult (55-70)	2.77	Primary	No	Yes	No	No	low	<1 year	public	curative	21	0	4	2
1305	F	60	No	No	Yes	Older Adult (55-70)	5.21	Primary	No	Yes	No	No	low	<1 year	public	curative	22	1	0	3
1306	M	60	No	No	Yes	Older Adult (55-70)	4.91	Primary	No	Yes	No	No	low	<1 year	private	preventive	23	0	0	0
1307	M	60	No	No	Yes	Older Adult (55-70)	4.09	Primary	No	Yes	No	No	low	>1 year	private	curative	33	1	1	2
1308	M	58	No	No	Yes	Older Adult (55-70)	1.92	Primary	No	Yes	No	No	low	>1 year	private	preventive	62	0	1	0
1309	F	55	No	No	Yes	Older Adult (55-70)	1.1	None	Yes	No	No	No	low	>1 year	private	preventive	27	0	2	3
1310	M	55	No	No	Yes	Older Adult (55-70)	5.03	None	Yes	No	No	No	low	>1 year	private	curative	2	1	1	0
1311	F	57	No	No	Yes	Older Adult (55-70)	5.38	None	Yes	No	No	No	low	>1 year	public	curative	24	2	2	4
1312	F	55	No	No	Yes	Older Adult (55-70)	3.58	None	Yes	No	No	No	low	>1 year	private	curative	24	0	4	0
1313	F	55	No	No	Yes	Older Adult (55-70)	2.37	None	Yes	No	No	No	low	<1 year	public	preventive	22	1	3	0
1314	M	57	No	No	Yes	Older Adult (55-70)	3.14	Secondary	No	Yes	Yes	No	low	<1 year	public	preventive	12	2	4	1
1315	F	56	No	No	Yes	Older Adult (55-70)	4.68	Primary	No	Yes	No	No	low	<1 year	private	preventive	18	2	1	1
1316	F	55	No	No	Yes	Older Adult (55-70)	6.29	None	Yes	No	No	No	low	<1 year	private	preventive	14	2	1	2
1317	M	58	No	No	Yes	Older Adult (55-70)	1.48	Primary	No	Yes	No	No	low	<1 year	private	preventive	15	3	1	1
1318	F	60	No	No	Yes	Older Adult (55-70)	4.45	Primary	No	Yes	No	No	low	<1 year	private	preventive	25	3	2	2
1319	F	60	No	No	Yes	Older Adult (55-70)	3.39	Secondary	No	Yes	Yes	No	low	<1 year	private	curative	28	4	2	4
1320	M	60	No	No	Yes	Older Adult (55-70)	1.56	Secondary	No	Yes	Yes	No	low	>1 year	public	curative	29	4	2	3
1321	M	58	No	No	Yes	Older Adult (55-70)	1.44	Secondary	No	Yes	Yes	No	low	>1 year	private	curative	32	1	2	4
1322	M	55	No	No	Yes	Older Adult (55-70)	5.76	None	Yes	No	No	No	low	>1 year	public	preventive	33	4	4	1
1323	F	55	No	No	Yes	Older Adult (55-70)	1.95	Primary	No	Yes	No	No	low	>1 year	public	curative	34	2	0	1
1324	M	57	No	No	Yes	Older Adult (55-70)	6.74	Graduate	No	No	No	Yes	low	>1 year	private	preventive	35	3	2	1
1325	F	55	No	No	Yes	Older Adult (55-70)	4.25	Graduate	No	No	No	Yes	low	>1 year	private	preventive	54	1	1	2
1326	F	55	No	No	Yes	Older Adult (55-70)	5.69	Graduate	No	No	No	Yes	low	<1 year	private	curative	50	4	2	2
1327	F	57	No	No	Yes	Older Adult (55-70)	1.99	None	Yes	No	No	No	low	<1 year	private	curative	28	0	2	4
1328	M	56	No	No	Yes	Older Adult (55-70)	2.66	Primary	No	Yes	No	No	low	<1 year	private	curative	20	2	3	3
1329	F	55	No	No	Yes	Older Adult (55-70)	3	Graduate	No	No	No	Yes	low	<1 year	public	preventive	51	3	2	4
1330	F	58	No	No	Yes	Older Adult (55-70)	3	Graduate	No	No	No	Yes	low	<1 year	private	preventive	28	4	3	1
1331	M	60	No	No	Yes	Older Adult (55-70)	1.63	Graduate	No	No	No	Yes	low	<1 year	public	preventive	31	1	0	1
1332	F	60	No	No	Yes	Older Adult (55-70)	5.09	Primary	No	Yes	No	No	low	<1 year	public	preventive	35	5	2	1
1333	F	60	No	No	Yes	Older Adult (55-70)	1.5	Primary	No	Yes	No	No	low	>1 year	private	preventive	36	0	0	2
1334	M	58	No	No	Yes	Older Adult (55-70)	6.79	Secondary	No	Yes	Yes	No	low	>1 year	private	preventive	30	1	3	2
1335	M	55	No	No	Yes	Older Adult (55-70)	6.3	Secondary	No	Yes	Yes	No	low	>1 year	private	curative	24	1	0	2
1336	M	55	No	No	Yes	Older Adult (55-70)	1.92	Secondary	No	Yes	Yes	No	low	>1 year	private	curative	50	2	4	2
1337	F	57	No	No	Yes	Older Adult (55-70)	5.56	None	Yes	No	No	No	low	>1 year	private	curative	25	3	0	4
1338	M	55	No	No	Yes	Older Adult (55-70)	6.38	Primary	No	Yes	No	No	low	>1 year	public	preventive	14	1	0	0
1339	F	55	No	No	Yes	Older Adult (55-70)	1.3	None	Yes	No	No	No	low	<1 year	private	curative	24	3	1	2
1340	F	57	No	No	Yes	Older Adult (55-70)	6.4	None	Yes	No	No	No	low	<1 year	public	preventive	3	1	1	1
1341	F	56	No	No	Yes	Older Adult (55-70)	2.21	Primary	No	Yes	No	No	low	<1 year	public	preventive	54	3	2	2
1342	M	55	No	No	Yes	Older Adult (55-70)	1.74	Primary	No	Yes	No	No	low	<1 year	private	curative	70	1	1	2
1343	F	58	No	No	Yes	Older Adult (55-70)	4.45	Primary	No	Yes	No	No	low	<1 year	private	curative	27	4	2	3
1344	F	60	No	No	Yes	Older Adult (55-70)	5.01	Primary	No	Yes	No	No	low	<1 year	private	curative	42	0	4	2
1345	M	60	No	No	Yes	Older Adult (55-70)	4.21	Primary	No	Yes	No	No	low	<1 year	private	preventive	24	2	3	3
1346	F	60	No	No	Yes	Older Adult (55-70)	1.48	Primary	No	Yes	No	No	high	>1 year	private	preventive	14	1	4	0
1347	F	58	No	No	Yes	Older Adult (55-70)	4.82	None	Yes	No	No	No	high	>1 year	public	preventive	16	3	1	2
1348	M	55	No	No	Yes	Older Adult (55-70)	1.47	None	Yes	No	No	No	high	>1 year	private	preventive	15	1	1	0
1349	M	55	No	No	Yes	Older Adult (55-70)	5.61	None	Yes	No	No	No	high	>1 year	public	preventive	25	2	1	3
1350	M	57	No	No	Yes	Older Adult (55-70)	3.37	None	Yes	No	No	No	high	>1 year	public	preventive	32	0	2	0
1351	F	55	No	No	Yes	Older Adult (55-70)	4.03	None	Yes	No	No	No	high	>1 year	private	curative	53	1	2	4
1352	M	55	No	No	Yes	Older Adult (55-70)	1.38	Secondary	No	Yes	Yes	No	high	<1 year	private	curative	24	2	2	0
1353	F	57	No	No	Yes	Older Adult (55-70)	4.16	Primary	No	Yes	No	No	high	<1 year	private	curative	3	2	2	0
1354	F	56	No	No	Yes	Older Adult (55-70)	4.42	None	Yes	No	No	No	high	<1 year	private	preventive	35	2	4	1
1355	F	55	No	No	Yes	Older Adult (55-70)	2.47	Primary	No	Yes	No	No	high	<1 year	private	curative	21	3	0	1
1356	M	58	No	No	Yes	Older Adult (55-70)	5.76	Primary	No	Yes	No	No	high	<1 year	public	preventive	22	3	2	2
1357	F	60	No	No	Yes	Older Adult (55-70)	1.62	Secondary	No	Yes	Yes	No	high	<1 year	private	preventive	23	4	1	1
1358	F	55	No	No	Yes	Older Adult (55-70)	1.97	Secondary	No	Yes	Yes	No	high	<1 year	public	curative	33	4	2	2
1359	M	55	No	No	Yes	Older Adult (55-70)	3.49	Secondary	No	Yes	Yes	No	high	>1 year	public	curative	62	1	2	4
1360	F	57	No	No	Yes	Older Adult (55-70)	4.66	None	Yes	No	No	No	high	>1 year	private	curative	27	4	3	3
1361	F	56	No	No	Yes	Older Adult (55-70)	1.27	Primary	No	Yes	No	No	high	>1 year	private	preventive	2	2	2	4
1362	M	55	No	No	Yes	Older Adult (55-70)	3.39	Graduate	No	No	No	Yes	high	>1 year	private	preventive	24	3	3	1
1363	M	58	No	No	Yes	Older Adult (55-70)	6.1	Graduate	No	No	No	Yes	high	>1 year	private	preventive	24	1	0	1
1364	M	60	No	No	Yes	Older Adult (55-70)	4.26	Graduate	No	No	No	Yes	high	>1 year	private	preventive	22	4	2	1
1365	F	60	No	No	Yes	Older Adult (55-70)	1.89	Primary	No	Yes	No	No	high	<1 year	public	preventive	12	0	0	2
1366	M	60	No	No	Yes	Older Adult (55-70)	5.8	Primary	No	Yes	No	No	high	<1 year	private	preventive	18	2	3	2
1367	F	58	No	No	Yes	Older Adult (55-70)	6.52	Secondary	No	Yes	Yes	No	high	<1 year	public	curative	14	3	0	2
1368	F	55	No	No	Yes	Older Adult (55-70)	1.15	Secondary	No	Yes	Yes	No	high	<1 year	public	curative	15	4	4	2
1369	F	55	No	No	Yes	Older Adult (55-70)	2.54	Secondary	No	Yes	Yes	No	high	<1 year	private	curative	25	1	0	4
1370	M	57	No	No	Yes	Older Adult (55-70)	3.37	None	Yes	No	No	No	high	>1 year	private	preventive	28	5	0	0
1371	F	55	No	No	Yes	Older Adult (55-70)	2.93	Primary	No	Yes	No	No	high	>1 year	private	curative	29	0	1	2
1372	F	55	No	No	Yes	Older Adult (55-70)	4.58	None	Yes	No	No	No	high	>1 year	private	preventive	32	1	1	1
1373	M	57	No	No	Yes	Older Adult (55-70)	3.77	None	Yes	No	No	No	high	>1 year	private	preventive	33	1	2	2
1374	F	56	No	No	Yes	Older Adult (55-70)	3.08	Primary	No	Yes	No	No	high	>1 year	public	curative	34	2	1	2
1375	F	55	No	No	Yes	Older Adult (55-70)	1.85	Primary	No	Yes	No	No	high	>1 year	private	curative	35	3	2	3
1376	M	58	No	No	Yes	Older Adult (55-70)	4.62	Primary	No	Yes	No	No	high	<1 year	public	curative	54	1	4	2
1377	M	60	No	No	Yes	Older Adult (55-70)	1.99	Primary	No	Yes	No	No	high	<1 year	public	preventive	50	3	3	3
1378	M	60	No	No	Yes	Older Adult (55-70)	3.14	Primary	No	Yes	No	No	high	<1 year	private	preventive	28	1	4	0
1379	F	60	No	No	Yes	Older Adult (55-70)	2.13	Primary	No	Yes	No	No	high	<1 year	private	preventive	20	3	1	2
1380	M	58	No	No	Yes	Older Adult (55-70)	2.42	None	Yes	No	No	No	high	<1 year	private	preventive	51	1	1	0
1381	F	55	No	No	Yes	Older Adult (55-70)	5.26	None	Yes	No	No	No	high	<1 year	private	preventive	28	4	1	3
1382	F	55	No	No	Yes	Older Adult (55-70)	7.01	None	Yes	No	No	No	high	<1 year	private	preventive	31	0	2	0
1383	F	57	No	No	Yes	Older Adult (55-70)	4.32	None	Yes	No	No	No	high	>1 year	public	curative	35	2	2	4
1384	M	55	No	No	Yes	Older Adult (55-70)	5.09	None	Yes	No	No	No	high	>1 year	private	curative	36	1	4	0
1385	F	55	No	No	Yes	Older Adult (55-70)	1.02	Secondary	No	Yes	Yes	No	high	>1 year	public	curative	30	3	3	0
1386	F	57	No	No	Yes	Older Adult (55-70)	4.04	Primary	No	Yes	No	No	high	>1 year	public	preventive	24	1	4	1
1387	M	56	No	No	Yes	Older Adult (55-70)	1.32	None	Yes	No	No	No	high	>1 year	private	curative	50	2	1	1
1388	F	55	No	No	Yes	Older Adult (55-70)	3.71	Primary	No	Yes	No	No	high	>1 year	private	preventive	25	0	1	2
1389	F	58	No	No	Yes	Older Adult (55-70)	4.24	Primary	No	Yes	No	No	high	<1 year	private	preventive	14	1	1	1
1390	M	60	No	No	Yes	Older Adult (55-70)	1.04	Secondary	No	Yes	Yes	No	high	<1 year	private	curative	24	2	2	2
1391	M	55	No	No	Yes	Older Adult (55-70)	6.22	Secondary	No	Yes	Yes	No	high	<1 year	private	curative	3	2	2	4
1392	M	55	No	No	Yes	Older Adult (55-70)	6.92	Secondary	No	Yes	Yes	No	high	<1 year	public	curative	54	2	2	3
1393	F	57	No	No	Yes	Older Adult (55-70)	4.83	None	Yes	No	No	No	high	<1 year	private	preventive	70	3	2	4
1394	M	56	No	No	Yes	Older Adult (55-70)	1.91	Primary	No	Yes	No	No	high	<1 year	public	preventive	27	3	4	1
1395	F	55	No	No	Yes	Older Adult (55-70)	2.16	Graduate	No	No	No	Yes	high	<1 year	public	preventive	42	4	0	1
1396	F	58	No	No	Yes	Older Adult (55-70)	1.95	Graduate	No	No	No	Yes	high	>1 year	private	preventive	24	4	2	1
1397	F	60	No	No	Yes	Older Adult (55-70)	2.11	Graduate	No	No	No	Yes	high	>1 year	private	preventive	14	1	1	2
1398	M	60	No	No	Yes	Older Adult (55-70)	1.07	Primary	No	Yes	No	No	high	>1 year	private	preventive	16	4	2	2
1399	F	60	No	No	Yes	Older Adult (55-70)	5.63	Primary	No	Yes	No	No	high	>1 year	private	curative	15	2	2	2
1400	F	58	No	No	Yes	Older Adult (55-70)	2.75	Secondary	No	Yes	Yes	No	high	>1 year	private	curative	25	3	3	2
1401	M	55	No	No	Yes	Older Adult (55-70)	4.4	Secondary	No	Yes	Yes	No	high	>1 year	public	curative	32	1	2	4
1402	F	55	No	No	Yes	Older Adult (55-70)	5.14	Secondary	No	Yes	Yes	No	high	<1 year	private	preventive	53	4	3	0
1403	F	57	No	No	Yes	Older Adult (55-70)	2.98	None	Yes	No	No	No	high	<1 year	public	curative	24	0	0	2
1404	M	55	No	No	Yes	Older Adult (55-70)	5.53	Primary	No	Yes	No	No	high	<1 year	public	preventive	3	2	2	1
1405	M	55	No	No	Yes	Older Adult (55-70)	3.36	None	Yes	No	No	No	high	<1 year	private	preventive	35	3	0	2
1406	M	57	No	No	Yes	Older Adult (55-70)	5.11	None	Yes	No	No	No	high	<1 year	private	curative	21	4	3	2
1407	F	56	No	No	Yes	Older Adult (55-70)	1.96	Primary	No	Yes	No	No	high	<1 year	private	curative	22	1	0	3
1408	M	55	No	No	Yes	Older Adult (55-70)	3.93	Primary	No	Yes	No	No	high	<1 year	private	curative	23	5	4	2
1409	F	58	No	No	Yes	Older Adult (55-70)	6.38	Primary	No	Yes	No	No	high	>1 year	private	preventive	33	0	0	3
1410	F	60	No	No	Yes	Older Adult (55-70)	3.01	Primary	No	Yes	No	No	high	>1 year	public	preventive	62	1	0	0
1411	F	60	No	No	Yes	Older Adult (55-70)	3.06	Primary	No	Yes	No	No	high	>1 year	private	preventive	27	1	1	2
1412	M	60	No	No	Yes	Older Adult (55-70)	5.61	Primary	No	Yes	No	No	high	>1 year	public	preventive	2	2	1	0
1413	F	58	No	No	Yes	Older Adult (55-70)	4.92	None	Yes	No	No	No	high	>1 year	public	preventive	24	3	2	3
1414	F	55	No	No	Yes	Older Adult (55-70)	6.16	None	Yes	No	No	No	high	>1 year	private	preventive	24	1	1	0
1415	M	55	No	No	Yes	Older Adult (55-70)	7.14	None	Yes	No	No	No	high	<1 year	private	curative	22	3	2	4
1416	F	57	No	No	Yes	Older Adult (55-70)	5.31	None	Yes	No	No	No	high	<1 year	private	curative	12	1	4	0
1417	F	55	No	No	Yes	Older Adult (55-70)	1.04	None	Yes	No	No	No	high	<1 year	private	curative	18	3	3	0
1418	M	55	No	No	Yes	Older Adult (55-70)	1.42	Secondary	No	Yes	Yes	No	high	<1 year	private	preventive	14	1	4	1
1419	M	57	No	No	Yes	Older Adult (55-70)	5.94	Primary	No	Yes	No	No	high	<1 year	public	curative	15	4	1	1
1420	M	56	No	No	Yes	Older Adult (55-70)	4.93	None	Yes	No	No	No	high	<1 year	private	preventive	25	0	1	2
1421	F	55	No	No	Yes	Older Adult (55-70)	5.76	Primary	No	Yes	No	No	high	<1 year	public	preventive	28	2	1	1
1422	M	58	No	No	Yes	Older Adult (55-70)	4.42	Primary	No	Yes	No	No	high	>1 year	public	curative	29	1	2	2
1423	F	60	No	No	Yes	Older Adult (55-70)	1.48	Secondary	No	Yes	Yes	No	high	>1 year	private	curative	32	3	2	4
1424	F	55	No	No	Yes	Older Adult (55-70)	4.61	Secondary	No	Yes	Yes	No	high	>1 year	private	curative	33	1	2	3
1425	F	55	No	No	Yes	Older Adult (55-70)	4.42	Secondary	No	Yes	Yes	No	high	>1 year	private	preventive	34	2	2	4
1426	M	57	No	No	Yes	Older Adult (55-70)	5.18	None	Yes	No	No	No	high	>1 year	private	preventive	35	0	4	1
1427	F	56	No	No	Yes	Older Adult (55-70)	6.03	Primary	No	Yes	No	No	high	>1 year	private	preventive	54	1	0	1
1428	F	55	No	No	Yes	Older Adult (55-70)	7.06	Graduate	No	No	No	Yes	high	<1 year	public	preventive	50	2	2	1
1429	M	58	No	No	Yes	Older Adult (55-70)	4.8	Graduate	No	No	No	Yes	high	<1 year	private	preventive	28	2	1	2
1430	F	60	No	No	Yes	Older Adult (55-70)	2.13	Graduate	No	No	No	Yes	high	<1 year	public	preventive	20	2	2	2
1431	F	60	No	No	Yes	Older Adult (55-70)	3.51	Primary	No	Yes	No	No	high	<1 year	public	curative	51	3	2	4
1432	M	60	No	No	Yes	Older Adult (55-70)	4.1	Primary	No	Yes	No	No	high	<1 year	private	curative	28	3	3	3
1433	M	58	No	No	Yes	Older Adult (55-70)	4.37	Secondary	No	Yes	Yes	No	high	<1 year	private	curative	31	4	2	4
1434	M	55	No	No	Yes	Older Adult (55-70)	3.49	Secondary	No	Yes	Yes	No	high	<1 year	private	preventive	35	4	3	1
1435	F	55	No	No	Yes	Older Adult (55-70)	2.3	Secondary	No	Yes	Yes	No	high	>1 year	private	curative	36	1	0	1
1436	M	57	No	No	Yes	Older Adult (55-70)	2.73	None	Yes	No	No	No	high	>1 year	private	preventive	30	4	2	1
1437	F	55	No	No	Yes	Older Adult (55-70)	1.69	Primary	No	Yes	No	No	high	>1 year	public	preventive	24	2	0	2
1438	F	55	No	No	Yes	Older Adult (55-70)	5.39	None	Yes	No	No	No	high	>1 year	private	curative	50	3	3	2
1439	F	57	No	No	Yes	Older Adult (55-70)	3.39	None	Yes	No	No	No	high	>1 year	public	curative	25	1	0	2
1440	M	56	No	No	Yes	Older Adult (55-70)	4.64	Primary	No	Yes	No	No	high	>1 year	public	curative	14	4	4	2
1441	F	55	No	No	Yes	Older Adult (55-70)	1.91	Primary	No	Yes	No	No	high	<1 year	private	preventive	24	0	0	4
1442	F	58	No	No	Yes	Older Adult (55-70)	1.99	Primary	No	Yes	No	No	high	<1 year	private	preventive	3	2	0	0
1443	M	60	No	No	Yes	Older Adult (55-70)	1.12	Primary	No	Yes	No	No	high	<1 year	private	preventive	54	3	1	2
1444	F	60	No	No	Yes	Older Adult (55-70)	4.14	Primary	No	Yes	No	No	high	<1 year	private	preventive	70	4	1	1
1445	F	60	No	No	Yes	Older Adult (55-70)	4.04	Primary	No	Yes	No	No	high	<1 year	private	preventive	27	1	2	2
1446	M	58	No	No	Yes	Older Adult (55-70)	4.45	None	Yes	No	No	No	high	>1 year	public	preventive	42	5	1	2
1447	M	55	No	No	Yes	Older Adult (55-70)	2.64	None	Yes	No	No	No	high	>1 year	private	curative	24	0	2	3
1448	M	55	No	No	Yes	Older Adult (55-70)	4.65	None	Yes	No	No	No	high	>1 year	public	curative	14	1	4	2
1449	F	57	No	No	Yes	Older Adult (55-70)	3.07	None	Yes	No	No	No	high	>1 year	public	curative	16	1	3	3
1450	M	55	No	No	Yes	Older Adult (55-70)	7.02	None	Yes	No	No	No	high	>1 year	private	preventive	15	2	4	0
1451	F	55	No	No	Yes	Older Adult (55-70)	4.03	Secondary	No	Yes	Yes	No	high	>1 year	private	curative	25	3	1	2
1452	F	57	No	No	Yes	Older Adult (55-70)	5.36	Primary	No	Yes	No	No	high	<1 year	private	preventive	32	1	1	0
1453	F	56	No	No	Yes	Older Adult (55-70)	5.55	None	Yes	No	No	No	high	<1 year	private	preventive	53	3	1	3
1454	M	55	No	No	Yes	Older Adult (55-70)	4.85	Primary	No	Yes	No	No	high	<1 year	private	curative	24	1	2	0
1455	F	58	No	No	Yes	Older Adult (55-70)	1.15	Primary	No	Yes	No	No	high	<1 year	public	curative	3	3	2	4
1456	F	60	No	No	Yes	Older Adult (55-70)	3.72	Secondary	No	Yes	Yes	No	high	<1 year	private	curative	35	1	2	0
1457	M	55	No	No	Yes	Older Adult (55-70)	5.08	Secondary	No	Yes	Yes	No	high	<1 year	public	preventive	21	4	2	0
1458	F	55	No	No	Yes	Older Adult (55-70)	1.49	Secondary	No	Yes	Yes	No	high	<1 year	public	preventive	22	0	4	1
1459	F	57	No	No	Yes	Older Adult (55-70)	3.56	None	Yes	No	No	No	high	>1 year	private	preventive	23	2	0	1
1460	M	56	No	No	Yes	Older Adult (55-70)	2.44	Primary	No	Yes	No	No	high	>1 year	private	preventive	33	1	2	2
1461	M	55	No	No	Yes	Older Adult (55-70)	6.88	Graduate	No	No	No	Yes	high	>1 year	private	preventive	62	3	1	1
1462	M	58	No	No	Yes	Older Adult (55-70)	4.3	Graduate	No	No	No	Yes	high	>1 year	private	preventive	27	1	2	2
1463	F	60	No	No	Yes	Older Adult (55-70)	4.65	Graduate	No	No	No	Yes	high	>1 year	private	curative	2	2	2	4
1464	M	60	No	No	Yes	Older Adult (55-70)	3.28	Primary	No	Yes	No	No	high	>1 year	public	curative	24	0	3	3
1465	F	60	No	No	Yes	Older Adult (55-70)	4.07	Primary	No	Yes	No	No	high	<1 year	private	curative	24	1	2	4
1466	F	58	No	No	Yes	Older Adult (55-70)	4.78	Secondary	No	Yes	Yes	No	high	<1 year	public	preventive	22	2	3	1
1467	F	55	No	No	Yes	Older Adult (55-70)	5.47	Secondary	No	Yes	Yes	No	high	<1 year	public	curative	12	2	0	1
1468	M	55	No	No	Yes	Older Adult (55-70)	1.87	Secondary	No	Yes	Yes	No	high	<1 year	private	preventive	18	2	2	1
1469	F	57	No	No	Yes	Older Adult (55-70)	2.77	None	Yes	No	No	No	high	<1 year	private	preventive	14	3	0	2
1470	F	55	No	No	Yes	Older Adult (55-70)	2.52	Primary	No	Yes	No	No	high	<1 year	private	curative	15	3	3	2
1471	M	55	No	No	Yes	Older Adult (55-70)	2.24	None	Yes	No	No	No	high	<1 year	private	curative	25	4	0	2
1472	F	57	No	No	Yes	Older Adult (55-70)	6.84	None	Yes	No	No	No	high	>1 year	private	curative	28	4	4	2
1473	F	56	No	No	Yes	Older Adult (55-70)	5.16	Primary	No	Yes	No	No	high	>1 year	public	preventive	29	1	0	4
1474	M	55	No	No	Yes	Older Adult (55-70)	2.49	Primary	No	Yes	No	No	high	>1 year	private	preventive	32	4	0	0
1475	M	58	No	No	Yes	Older Adult (55-70)	4.11	Primary	No	Yes	No	No	high	>1 year	public	preventive	33	2	1	2
1476	M	60	No	No	Yes	Older Adult (55-70)	1.76	Primary	No	Yes	No	No	high	>1 year	public	preventive	34	3	1	1
1477	F	60	No	No	Yes	Older Adult (55-70)	2.49	Primary	No	Yes	No	No	high	>1 year	private	preventive	35	1	2	2
1478	M	60	No	No	Yes	Older Adult (55-70)	5.87	Primary	No	Yes	No	No	high	<1 year	private	preventive	54	4	1	2
1479	F	58	No	No	Yes	Older Adult (55-70)	3.42	None	Yes	No	No	No	high	<1 year	private	curative	50	0	2	3
1480	F	55	No	No	Yes	Older Adult (55-70)	4.21	None	Yes	No	No	No	high	<1 year	private	curative	28	2	4	2
1481	F	55	No	No	Yes	Older Adult (55-70)	6.16	None	Yes	No	No	No	high	<1 year	private	curative	20	3	3	1
1482	M	57	No	No	Yes	Older Adult (55-70)	4.75	None	Yes	No	No	No	high	<1 year	public	preventive	51	4	4	2
1483	F	55	No	No	Yes	Older Adult (55-70)	6.97	None	Yes	No	No	No	high	<1 year	private	curative	28	1	1	2
1484	F	55	No	No	Yes	Older Adult (55-70)	3.79	Secondary	No	Yes	Yes	No	high	<1 year	public	preventive	31	5	1	3
1485	M	57	No	No	Yes	Older Adult (55-70)	4.33	Primary	No	Yes	No	No	high	>1 year	public	preventive	35	0	1	2
1486	F	56	No	No	Yes	Older Adult (55-70)	6.17	None	Yes	No	No	No	high	>1 year	private	curative	36	1	2	3
1487	F	55	No	No	Yes	Older Adult (55-70)	5.44	Primary	No	Yes	No	No	high	>1 year	private	curative	30	1	2	0
1488	M	58	No	No	Yes	Older Adult (55-70)	4.21	Primary	No	Yes	No	No	high	>1 year	private	curative	24	2	4	2
1489	M	60	No	No	Yes	Older Adult (55-70)	4.97	Secondary	No	Yes	Yes	No	high	>1 year	private	preventive	50	3	3	0
1490	M	55	No	No	Yes	Older Adult (55-70)	6	Secondary	No	Yes	Yes	No	high	>1 year	private	preventive	25	1	4	3
1491	F	55	No	No	Yes	Older Adult (55-70)	4.78	Secondary	No	Yes	Yes	No	high	<1 year	public	preventive	14	3	1	0
1492	M	57	No	No	Yes	Older Adult (55-70)	6.28	None	Yes	No	No	No	high	<1 year	private	preventive	24	1	1	4
1493	F	56	No	No	Yes	Older Adult (55-70)	6.32	Primary	No	Yes	No	No	high	<1 year	public	preventive	3	3	1	0
1494	F	55	No	No	Yes	Older Adult (55-70)	1.93	Graduate	No	No	No	Yes	high	<1 year	public	preventive	54	1	2	0
1495	F	58	No	No	Yes	Older Adult (55-70)	4.42	Graduate	No	No	No	Yes	high	<1 year	private	curative	70	4	2	1
1496	M	60	No	No	Yes	Older Adult (55-70)	5.99	Graduate	No	No	No	Yes	high	<1 year	private	curative	27	0	2	1
1497	F	60	No	No	Yes	Older Adult (55-70)	4.62	Primary	No	Yes	No	No	high	<1 year	private	curative	42	2	2	2
1498	F	60	No	No	Yes	Older Adult (55-70)	5.43	Primary	No	Yes	No	No	high	>1 year	private	preventive	24	1	4	1
1499	M	58	No	No	Yes	Older Adult (55-70)	3.62	Secondary	No	Yes	Yes	No	high	>1 year	private	curative	14	3	0	2
1500	F	55	No	No	Yes	Older Adult (55-70)	5.6	Secondary	No	Yes	Yes	No	high	>1 year	public	preventive	16	1	2	4
1501	F	55	No	No	Yes	Older Adult (55-70)	6.84	Secondary	No	Yes	Yes	No	high	>1 year	private	preventive	15	2	1	3
1502	M	57	No	No	Yes	Older Adult (55-70)	1.01	None	Yes	No	No	No	high	>1 year	public	curative	25	0	2	4
1503	M	55	No	No	Yes	Older Adult (55-70)	2.3	Primary	No	Yes	No	No	high	>1 year	public	curative	32	1	2	1
1504	M	55	No	No	Yes	Older Adult (55-70)	1.35	None	Yes	No	No	No	high	<1 year	private	curative	53	2	3	1
1505	F	57	No	No	Yes	Older Adult (55-70)	4.12	None	Yes	No	No	No	high	<1 year	private	preventive	24	2	2	1
1506	M	56	No	No	Yes	Older Adult (55-70)	4.67	Primary	No	Yes	No	No	high	<1 year	private	preventive	3	2	3	2
1507	F	55	No	No	Yes	Older Adult (55-70)	5.63	Primary	No	Yes	No	No	high	<1 year	private	preventive	35	3	0	2
1508	F	58	No	No	Yes	Older Adult (55-70)	4.79	Primary	No	Yes	No	No	high	<1 year	private	preventive	21	3	2	4
1509	F	60	No	No	Yes	Older Adult (55-70)	4.02	Primary	No	Yes	No	No	high	<1 year	public	preventive	22	4	0	3
1510	M	60	No	No	Yes	Older Adult (55-70)	1.18	Primary	No	Yes	No	No	high	<1 year	private	preventive	23	4	3	4
1511	F	60	No	No	Yes	Older Adult (55-70)	4.45	Primary	No	Yes	No	No	high	>1 year	public	curative	33	1	0	1
1512	F	58	No	No	Yes	Older Adult (55-70)	4.44	None	Yes	No	No	No	high	>1 year	public	curative	62	4	4	1
1513	M	55	No	No	Yes	Older Adult (55-70)	2.18	None	Yes	No	No	No	high	>1 year	private	curative	27	2	0	1
1514	F	55	No	No	Yes	Older Adult (55-70)	2.73	None	Yes	No	No	No	high	>1 year	private	preventive	2	3	0	2
1515	F	57	No	No	Yes	Older Adult (55-70)	2.21	None	Yes	No	No	No	high	>1 year	private	curative	24	1	1	2
1516	M	55	No	No	Yes	Older Adult (55-70)	2.12	None	Yes	No	No	No	high	>1 year	private	preventive	24	4	1	2
1517	M	55	No	No	Yes	Older Adult (55-70)	3.53	Secondary	No	Yes	Yes	No	high	<1 year	private	preventive	22	0	2	2
1518	M	57	No	No	Yes	Older Adult (55-70)	5.41	Primary	No	Yes	No	No	high	<1 year	public	curative	12	2	1	4
1519	F	56	No	No	Yes	Older Adult (55-70)	7.05	None	Yes	No	No	No	high	<1 year	private	curative	18	3	2	0
1520	M	55	No	No	Yes	Older Adult (55-70)	3.4	Primary	No	Yes	No	No	high	<1 year	public	curative	14	4	4	2
1521	F	58	No	No	Yes	Older Adult (55-70)	5.13	Primary	No	Yes	No	No	high	<1 year	public	preventive	15	1	3	1
1522	F	60	No	No	Yes	Older Adult (55-70)	5.07	Secondary	No	Yes	Yes	No	high	>1 year	private	preventive	25	5	4	2
1523	F	55	No	No	Yes	Older Adult (55-70)	2.93	Secondary	No	Yes	Yes	No	high	>1 year	private	preventive	28	0	1	2
1524	M	55	No	No	Yes	Older Adult (55-70)	7.08	Secondary	No	Yes	Yes	No	high	>1 year	private	preventive	29	1	1	3
1525	F	57	No	No	Yes	Older Adult (55-70)	3.21	None	Yes	No	No	No	high	>1 year	private	preventive	32	1	1	2
1526	F	56	No	No	Yes	Older Adult (55-70)	4.93	Primary	No	Yes	No	No	high	>1 year	private	preventive	33	2	2	3
1527	M	55	No	No	Yes	Older Adult (55-70)	1.77	Graduate	No	No	No	Yes	high	>1 year	public	curative	34	3	2	0
1528	F	58	No	No	Yes	Older Adult (55-70)	2.61	Graduate	No	No	No	Yes	high	<1 year	private	curative	35	1	2	2
1529	F	60	No	No	Yes	Older Adult (55-70)	4.3	Graduate	No	No	No	Yes	high	<1 year	public	curative	54	3	2	0
1530	M	60	No	No	Yes	Older Adult (55-70)	4.01	Primary	No	Yes	No	No	high	<1 year	public	preventive	50	1	4	3
1531	M	60	No	No	Yes	Older Adult (55-70)	6.5	Primary	No	Yes	No	No	high	<1 year	private	curative	28	3	0	0
1532	M	58	No	No	Yes	Older Adult (55-70)	3.9	Secondary	No	Yes	Yes	No	high	<1 year	private	preventive	20	1	2	4
1533	F	55	No	No	Yes	Older Adult (55-70)	2.61	Secondary	No	Yes	Yes	No	high	<1 year	private	preventive	51	4	1	0
1534	M	55	No	No	Yes	Older Adult (55-70)	5.33	Secondary	No	Yes	Yes	No	high	<1 year	private	curative	28	0	2	0
1535	F	57	No	No	Yes	Older Adult (55-70)	2.99	None	Yes	No	No	No	high	>1 year	private	curative	31	2	2	1
1536	F	55	No	No	Yes	Older Adult (55-70)	6.51	Primary	No	Yes	No	No	high	>1 year	public	curative	35	1	3	1
1537	F	55	No	No	Yes	Older Adult (55-70)	4.27	None	Yes	No	No	No	high	>1 year	private	preventive	36	3	2	2
1538	M	57	No	No	Yes	Older Adult (55-70)	2.15	None	Yes	No	No	No	high	>1 year	public	preventive	30	1	3	1
1539	F	56	No	No	Yes	Older Adult (55-70)	1.41	Primary	No	Yes	No	No	high	>1 year	public	preventive	24	2	0	2
1540	F	55	No	No	Yes	Older Adult (55-70)	1.81	Primary	No	Yes	No	No	high	>1 year	private	preventive	50	0	2	4
1541	M	58	No	No	Yes	Older Adult (55-70)	4.64	Primary	No	Yes	No	No	high	<1 year	private	preventive	25	1	0	3
1542	F	60	No	No	Yes	Older Adult (55-70)	2.7	Primary	No	Yes	No	No	high	<1 year	private	preventive	14	2	3	4
1543	F	60	No	No	Yes	Older Adult (55-70)	6.37	Primary	No	Yes	No	No	high	<1 year	private	curative	24	2	0	1
1544	M	60	No	No	Yes	Older Adult (55-70)	3.86	Primary	No	Yes	No	No	high	<1 year	private	curative	3	2	4	1
1545	M	58	No	No	Yes	Older Adult (55-70)	4.77	None	Yes	No	No	No	high	<1 year	public	curative	54	3	0	1
1546	M	55	No	No	Yes	Older Adult (55-70)	5.21	None	Yes	No	No	No	high	<1 year	private	preventive	70	3	0	2
1547	F	55	No	No	Yes	Older Adult (55-70)	2.59	None	Yes	No	No	No	high	<1 year	public	curative	27	4	1	2
1548	M	57	No	No	Yes	Older Adult (55-70)	1.37	None	Yes	No	No	No	high	>1 year	public	preventive	42	4	1	2
1549	F	55	No	No	Yes	Older Adult (55-70)	4.18	None	Yes	No	No	No	high	>1 year	private	preventive	24	1	2	2
1550	F	55	No	No	Yes	Older Adult (55-70)	2.63	Secondary	No	Yes	Yes	No	high	>1 year	private	curative	14	4	1	4
1551	F	57	No	No	Yes	Older Adult (55-70)	6.25	Primary	No	Yes	No	No	high	>1 year	private	curative	16	2	2	0
1552	M	56	No	No	Yes	Older Adult (55-70)	5.89	None	Yes	No	No	No	high	>1 year	private	curative	15	3	4	2
1553	F	55	No	No	Yes	Older Adult (55-70)	1.52	Primary	No	Yes	No	No	high	>1 year	private	preventive	25	1	3	1
1554	F	58	No	No	Yes	Older Adult (55-70)	6.08	Primary	No	Yes	No	No	high	<1 year	public	preventive	32	4	4	2
1555	M	60	No	No	Yes	Older Adult (55-70)	5.09	Secondary	No	Yes	Yes	No	high	<1 year	private	preventive	53	0	1	2
1556	F	55	No	No	Yes	Older Adult (55-70)	2.13	Secondary	No	Yes	Yes	No	high	<1 year	public	preventive	24	2	1	3
1557	F	55	No	No	Yes	Older Adult (55-70)	1.68	Secondary	No	Yes	Yes	No	high	<1 year	public	preventive	3	3	1	2
1558	M	57	No	No	Yes	Older Adult (55-70)	4.73	None	Yes	No	No	No	high	<1 year	private	preventive	35	4	2	3
1559	M	56	No	No	Yes	Older Adult (55-70)	4.91	Primary	No	Yes	No	No	high	<1 year	private	curative	21	1	2	0
1560	M	55	No	No	Yes	Older Adult (55-70)	1.9	Graduate	No	No	No	Yes	high	<1 year	private	curative	22	5	2	2
1561	F	58	No	No	Yes	Older Adult (55-70)	2.26	Graduate	No	No	No	Yes	high	>1 year	private	curative	23	0	2	0
1562	M	60	No	No	Yes	Older Adult (55-70)	4.81	Graduate	No	No	No	Yes	high	>1 year	private	preventive	33	1	4	3
1563	F	60	No	No	Yes	Older Adult (55-70)	5.44	Primary	No	Yes	No	No	high	>1 year	public	curative	62	1	0	0
1564	F	60	No	No	Yes	Older Adult (55-70)	4.62	Primary	No	Yes	No	No	high	>1 year	private	preventive	27	2	2	4
1565	F	58	No	No	Yes	Older Adult (55-70)	4.9	Secondary	No	Yes	Yes	No	high	>1 year	public	preventive	2	3	1	0
1566	M	55	No	No	Yes	Older Adult (55-70)	3.09	Secondary	No	Yes	Yes	No	high	>1 year	public	curative	24	1	2	0
1567	F	55	No	No	Yes	Older Adult (55-70)	4.11	Secondary	No	Yes	Yes	No	high	<1 year	private	curative	24	3	2	1
1568	F	57	No	No	Yes	Older Adult (55-70)	2.32	None	Yes	No	No	No	high	<1 year	private	curative	22	1	3	1
1569	M	55	No	No	Yes	Older Adult (55-70)	3.87	Primary	No	Yes	No	No	high	<1 year	private	preventive	12	3	2	2
1570	F	55	No	No	Yes	Older Adult (55-70)	2.66	None	Yes	No	No	No	high	<1 year	private	preventive	18	1	3	1
1571	F	57	No	No	Yes	Older Adult (55-70)	3.17	None	Yes	No	No	No	high	<1 year	private	preventive	14	4	0	2
1572	M	56	No	No	Yes	Older Adult (55-70)	2.99	Primary	No	Yes	No	No	high	<1 year	public	preventive	15	0	2	4
1573	M	55	No	No	Yes	Older Adult (55-70)	4.75	Primary	No	Yes	No	No	high	<1 year	private	preventive	25	2	0	3
1574	M	58	No	No	Yes	Older Adult (55-70)	2.39	Primary	No	Yes	No	No	high	>1 year	public	preventive	28	1	3	4
1575	F	60	No	No	Yes	Older Adult (55-70)	3.4	Primary	No	Yes	No	No	high	>1 year	public	curative	29	3	0	1
1576	M	60	No	No	Yes	Older Adult (55-70)	2.59	Primary	No	Yes	No	No	high	>1 year	private	curative	32	1	4	1
1577	F	60	No	No	Yes	Older Adult (55-70)	5.32	Primary	No	Yes	No	No	high	>1 year	private	curative	33	2	0	1
1578	F	58	No	No	Yes	Older Adult (55-70)	1.3	None	Yes	No	No	No	high	>1 year	private	preventive	34	0	0	2
1579	F	55	No	No	Yes	Older Adult (55-70)	4.23	None	Yes	No	No	No	high	>1 year	private	curative	35	1	1	2
1580	M	55	No	No	Yes	Older Adult (55-70)	2.87	None	Yes	No	No	No	high	<1 year	private	preventive	54	2	1	2
1581	F	57	No	No	Yes	Older Adult (55-70)	1.78	None	Yes	No	No	No	high	<1 year	public	preventive	50	2	2	2
1582	F	55	No	No	Yes	Older Adult (55-70)	1.97	None	Yes	No	No	No	high	<1 year	private	curative	28	2	1	4
1583	M	55	No	No	Yes	Older Adult (55-70)	3.16	Secondary	No	Yes	Yes	No	high	<1 year	public	curative	20	3	2	0
1584	F	57	No	No	Yes	Older Adult (55-70)	1.05	Primary	No	Yes	No	No	high	<1 year	public	curative	51	3	4	2
1585	F	56	No	No	Yes	Older Adult (55-70)	3.98	None	Yes	No	No	No	high	<1 year	private	preventive	28	4	3	1
1586	M	55	No	No	Yes	Older Adult (55-70)	5.26	Primary	No	Yes	No	No	high	<1 year	private	preventive	31	4	4	2
1587	M	58	No	No	Yes	Older Adult (55-70)	4.64	Primary	No	Yes	No	No	high	>1 year	private	preventive	35	1	1	2
1588	M	60	No	No	Yes	Older Adult (55-70)	2.99	Secondary	No	Yes	Yes	No	high	>1 year	private	preventive	36	4	1	3
1589	F	55	No	No	Yes	Older Adult (55-70)	4.7	Secondary	No	Yes	Yes	No	high	>1 year	private	preventive	30	2	1	2
1590	M	55	No	No	Yes	Older Adult (55-70)	4.13	Secondary	No	Yes	Yes	No	high	>1 year	public	preventive	24	3	2	3
1591	F	57	No	No	Yes	Older Adult (55-70)	1.79	None	Yes	No	No	No	high	>1 year	private	curative	50	1	2	0
1592	F	56	No	No	Yes	Older Adult (55-70)	4.35	Primary	No	Yes	No	No	high	>1 year	public	curative	25	4	4	2
1593	F	55	No	No	Yes	Older Adult (55-70)	5.6	Graduate	No	No	No	Yes	high	<1 year	public	curative	14	0	3	0
1594	M	58	No	No	Yes	Older Adult (55-70)	2.93	Graduate	No	No	No	Yes	high	<1 year	private	preventive	24	2	4	3
1595	F	60	No	No	Yes	Older Adult (55-70)	1.61	Graduate	No	No	No	Yes	high	<1 year	private	curative	3	3	1	0
1596	F	60	No	No	Yes	Older Adult (55-70)	1.05	None	Yes	No	No	No	high	<1 year	private	preventive	54	4	1	4
1597	M	60	No	No	Yes	Older Adult (55-70)	1.2	Primary	No	Yes	No	No	high	<1 year	private	preventive	70	1	1	0
1598	F	58	No	No	Yes	Older Adult (55-70)	4.33	Graduate	No	No	No	Yes	high	>1 year	private	curative	27	5	2	0
1599	F	55	No	No	Yes	Older Adult (55-70)	2.13	Graduate	No	No	No	Yes	high	>1 year	public	curative	42	0	2	1
1600	M	55	No	No	Yes	Older Adult (55-70)	5.97	Graduate	No	No	No	Yes	high	>1 year	private	curative	24	1	2	1
1601	M	57	No	No	Yes	Older Adult (55-70)	6.94	Primary	No	Yes	No	No	high	>1 year	public	preventive	14	1	2	2
1602	M	55	No	No	Yes	Older Adult (55-70)	4.3	Primary	No	Yes	No	No	high	>1 year	public	preventive	16	2	4	1
1603	F	55	No	No	Yes	Older Adult (55-70)	3.6	Secondary	No	Yes	Yes	No	high	>1 year	private	preventive	15	3	0	2
1604	M	57	No	No	Yes	Older Adult (55-70)	5.08	Secondary	No	Yes	Yes	No	high	<1 year	private	preventive	25	1	2	4
1605	F	56	No	No	Yes	Older Adult (55-70)	1.23	Secondary	No	Yes	Yes	No	high	<1 year	private	preventive	32	3	1	3
1606	F	55	No	No	Yes	Older Adult (55-70)	4.88	None	Yes	No	No	No	high	<1 year	private	preventive	53	1	2	4
1607	F	58	No	No	Yes	Older Adult (55-70)	4.92	Primary	No	Yes	No	No	high	<1 year	private	curative	24	3	2	1
1608	M	60	No	No	Yes	Older Adult (55-70)	4.41	None	Yes	No	No	No	high	<1 year	public	curative	3	1	3	1
1609	F	60	No	No	Yes	Older Adult (55-70)	1.38	None	Yes	No	No	No	high	<1 year	private	curative	35	4	2	1
1610	F	60	No	No	Yes	Older Adult (55-70)	4.55	Primary	No	Yes	No	No	high	<1 year	public	preventive	21	0	3	2
1611	M	58	No	No	Yes	Older Adult (55-70)	4.06	Primary	No	Yes	No	No	high	>1 year	public	curative	22	2	0	2
1612	F	55	No	No	Yes	Older Adult (55-70)	5.88	Primary	No	Yes	No	No	high	>1 year	private	preventive	23	1	2	4
1613	F	55	No	No	Yes	Older Adult (55-70)	6.45	Primary	No	Yes	No	No	high	>1 year	private	preventive	33	3	0	3
1614	M	57	No	No	Yes	Older Adult (55-70)	6.37	Primary	No	Yes	No	No	high	>1 year	private	curative	62	1	3	4
1615	M	55	No	No	Yes	Older Adult (55-70)	4.74	Primary	No	Yes	No	No	high	>1 year	private	curative	27	2	0	1
1616	M	55	No	No	Yes	Older Adult (55-70)	1.19	None	Yes	No	No	No	high	>1 year	private	curative	2	0	4	1
1617	F	57	No	No	Yes	Older Adult (55-70)	4.99	None	Yes	No	No	No	high	<1 year	public	preventive	24	1	0	1
1618	M	56	No	No	Yes	Older Adult (55-70)	5.84	None	Yes	No	No	No	high	<1 year	private	preventive	24	2	0	2
1619	F	55	No	No	Yes	Older Adult (55-70)	3.91	None	Yes	No	No	No	high	<1 year	public	preventive	22	2	1	2
1620	F	58	No	No	Yes	Older Adult (55-70)	4.42	None	Yes	No	No	No	high	<1 year	public	preventive	12	2	1	2
1621	F	60	No	No	Yes	Older Adult (55-70)	1.13	Secondary	No	Yes	Yes	No	high	<1 year	private	preventive	18	3	2	2
1622	M	55	No	No	Yes	Older Adult (55-70)	2.16	Primary	No	Yes	No	No	high	<1 year	private	preventive	14	3	1	4
1623	F	55	No	No	Yes	Older Adult (55-70)	6.94	None	Yes	No	No	No	high	<1 year	private	curative	15	4	2	0
1624	F	57	No	No	Yes	Older Adult (55-70)	7.12	Primary	No	Yes	No	No	high	>1 year	private	curative	25	4	4	2
1625	M	56	No	No	Yes	Older Adult (55-70)	3.95	Primary	No	Yes	No	No	high	>1 year	private	curative	28	1	3	1
1626	F	55	No	No	Yes	Older Adult (55-70)	6.08	Secondary	No	Yes	Yes	No	high	>1 year	public	preventive	29	4	4	2
1627	F	58	No	No	Yes	Older Adult (55-70)	3.79	Secondary	No	Yes	Yes	No	high	>1 year	private	curative	32	2	1	2
1628	M	60	No	No	Yes	Older Adult (55-70)	4.72	Secondary	No	Yes	Yes	No	high	>1 year	public	preventive	33	3	1	3
1629	M	60	No	No	Yes	Older Adult (55-70)	4.28	None	Yes	No	No	No	high	>1 year	public	preventive	34	1	1	2
1630	M	60	No	No	Yes	Older Adult (55-70)	4.81	Primary	No	Yes	No	No	high	<1 year	private	curative	35	4	2	3
1631	F	58	No	No	Yes	Older Adult (55-70)	1.06	Graduate	No	No	No	Yes	high	<1 year	private	curative	54	0	2	0
1632	M	55	No	No	Yes	Older Adult (55-70)	1.2	Graduate	No	No	No	Yes	high	<1 year	private	curative	50	2	2	2
1633	F	55	No	No	Yes	Older Adult (55-70)	6.51	Graduate	No	No	No	Yes	high	<1 year	private	preventive	28	3	2	0
1634	F	57	No	No	Yes	Older Adult (55-70)	7.12	Primary	No	Yes	No	No	high	<1 year	private	preventive	20	4	4	3
1635	F	55	No	No	Yes	Older Adult (55-70)	3.57	Primary	No	Yes	No	No	low	<1 year	public	preventive	51	1	0	0
1636	M	55	No	No	Yes	Older Adult (55-70)	4.55	Secondary	No	Yes	Yes	No	low	<1 year	private	preventive	28	5	2	4
1637	F	57	No	No	Yes	Older Adult (55-70)	3.54	Secondary	No	Yes	Yes	No	low	>1 year	public	preventive	31	0	1	0
1638	F	56	No	No	Yes	Older Adult (55-70)	6.57	Secondary	No	Yes	Yes	No	low	>1 year	public	preventive	35	1	2	0
1639	M	55	No	No	Yes	Older Adult (55-70)	5.84	None	Yes	No	No	No	low	>1 year	private	curative	36	1	2	1
1640	F	58	No	No	Yes	Older Adult (55-70)	1.49	Primary	No	Yes	No	No	low	>1 year	private	curative	30	2	3	1
1641	F	60	No	No	Yes	Older Adult (55-70)	2.56	None	Yes	No	No	No	low	>1 year	private	curative	24	3	2	2
1642	M	60	No	No	Yes	Older Adult (55-70)	3.84	None	Yes	No	No	No	low	>1 year	private	preventive	50	1	3	1
1643	M	60	No	No	Yes	Older Adult (55-70)	4.97	Primary	No	Yes	No	No	low	<1 year	private	curative	25	3	0	2
1644	M	58	No	No	Yes	Older Adult (55-70)	5.53	Primary	No	Yes	No	No	low	<1 year	public	preventive	14	1	2	4
1645	F	55	No	No	Yes	Older Adult (55-70)	5.35	Primary	No	Yes	No	No	low	<1 year	private	preventive	24	3	0	3
1646	M	55	No	No	Yes	Older Adult (55-70)	2.69	Primary	No	Yes	No	No	low	<1 year	public	curative	3	1	3	4
1647	F	57	No	No	Yes	Older Adult (55-70)	6.59	Primary	No	Yes	No	No	low	<1 year	public	curative	54	4	0	1
1648	F	55	No	No	Yes	Older Adult (55-70)	1.09	Primary	No	Yes	No	No	low	<1 year	private	curative	70	0	4	1
1649	F	55	No	No	Yes	Older Adult (55-70)	3.22	None	Yes	No	No	No	low	<1 year	private	preventive	27	2	0	1
1650	M	57	No	No	Yes	Older Adult (55-70)	3.73	None	Yes	No	No	No	low	>1 year	private	preventive	42	1	0	2
1651	F	56	No	No	Yes	Older Adult (55-70)	5.58	None	Yes	No	No	No	low	>1 year	private	preventive	24	3	1	2
1652	F	55	No	No	Yes	Older Adult (55-70)	6.76	None	Yes	No	No	No	low	>1 year	private	preventive	14	1	1	2
1653	M	58	No	No	Yes	Older Adult (55-70)	2.4	None	Yes	No	No	No	low	>1 year	public	preventive	16	2	2	2
1654	F	60	No	No	Yes	Older Adult (55-70)	3.4	Secondary	No	Yes	Yes	No	low	>1 year	private	preventive	15	0	1	4
1655	F	55	No	No	Yes	Older Adult (55-70)	3.95	Primary	No	Yes	No	No	low	>1 year	public	curative	25	1	2	0
1656	M	55	No	No	Yes	Older Adult (55-70)	3.99	None	Yes	No	No	No	low	<1 year	public	curative	32	2	4	2
1657	M	57	No	No	Yes	Older Adult (55-70)	6.79	Primary	No	Yes	No	No	low	<1 year	private	curative	53	2	3	1
1658	M	56	No	No	Yes	Older Adult (55-70)	4.05	Primary	No	Yes	No	No	low	<1 year	private	preventive	24	2	4	2
1659	F	55	No	No	Yes	Older Adult (55-70)	3.87	Secondary	No	Yes	Yes	No	low	<1 year	private	curative	3	3	1	2
1660	M	58	No	No	Yes	Older Adult (55-70)	3.53	Secondary	No	Yes	Yes	No	low	<1 year	private	preventive	35	3	1	3
1661	F	60	No	No	Yes	Older Adult (55-70)	3.91	Secondary	No	Yes	Yes	No	low	<1 year	private	preventive	21	4	1	2
1662	F	60	No	No	Yes	Older Adult (55-70)	3.33	None	Yes	No	No	No	low	<1 year	public	curative	22	4	2	3
1663	F	60	No	No	Yes	Older Adult (55-70)	3.31	Primary	No	Yes	No	No	low	>1 year	private	curative	23	1	2	0
1664	M	58	No	No	Yes	Older Adult (55-70)	4.12	Graduate	No	No	No	Yes	low	>1 year	public	curative	33	4	2	2
1665	F	55	No	No	Yes	Older Adult (55-70)	3.47	Graduate	No	No	No	Yes	low	>1 year	public	preventive	62	2	2	0
1666	F	55	No	No	Yes	Older Adult (55-70)	6.38	Graduate	No	No	No	Yes	low	>1 year	private	preventive	27	3	4	3
1667	M	57	No	No	Yes	Older Adult (55-70)	7.04	Primary	No	Yes	No	No	low	>1 year	private	preventive	2	1	0	0
1668	F	55	No	No	Yes	Older Adult (55-70)	3.41	Primary	No	Yes	No	No	low	>1 year	private	preventive	24	4	2	4
1669	F	55	No	No	Yes	Older Adult (55-70)	3.36	Secondary	No	Yes	Yes	No	low	<1 year	private	preventive	24	0	1	0
1670	M	57	No	No	Yes	Older Adult (55-70)	5.73	Secondary	No	Yes	Yes	No	low	<1 year	private	preventive	22	2	2	0
1671	M	56	No	No	Yes	Older Adult (55-70)	6.39	Secondary	No	Yes	Yes	No	low	<1 year	public	curative	12	3	2	1
1672	M	55	No	No	Yes	Older Adult (55-70)	3.1	None	Yes	No	No	No	low	<1 year	private	curative	18	4	3	1
1673	F	58	No	No	Yes	Older Adult (55-70)	4.51	Primary	No	Yes	No	No	low	<1 year	public	curative	14	1	2	2
1674	M	60	No	No	Yes	Older Adult (55-70)	3.04	None	Yes	No	No	No	low	>1 year	public	preventive	15	5	3	1
1675	F	60	No	No	Yes	Older Adult (55-70)	1.95	None	Yes	No	No	No	low	>1 year	private	curative	25	0	0	2
1676	F	60	No	No	Yes	Older Adult (55-70)	1.32	Primary	No	Yes	No	No	low	>1 year	private	preventive	28	1	2	4
1677	F	58	No	No	Yes	Older Adult (55-70)	4.93	Primary	No	Yes	No	No	low	>1 year	private	preventive	29	1	0	3
1678	M	55	No	No	Yes	Older Adult (55-70)	2.03	Primary	No	Yes	No	No	low	>1 year	private	curative	32	2	3	4
1679	F	55	No	No	Yes	Older Adult (55-70)	5.55	Primary	No	Yes	No	No	low	>1 year	private	curative	33	3	0	1
1680	F	57	No	No	Yes	Older Adult (55-70)	3.47	Primary	No	Yes	No	No	low	<1 year	public	curative	34	1	4	1
1681	M	55	No	No	Yes	Older Adult (55-70)	2.47	Primary	No	Yes	No	No	low	<1 year	private	preventive	35	3	0	1
1682	F	55	No	No	Yes	Older Adult (55-70)	2.64	None	Yes	No	No	No	low	<1 year	public	preventive	54	1	0	2
1683	F	57	No	No	Yes	Older Adult (55-70)	5.31	None	Yes	No	No	No	low	<1 year	public	preventive	50	3	1	2
1684	M	56	No	No	Yes	Older Adult (55-70)	2.75	None	Yes	No	No	No	low	<1 year	private	preventive	4	1	1	2
1685	M	55	No	No	Yes	Older Adult (55-70)	3.39	None	Yes	No	No	No	low	<1 year	private	preventive	20	4	2	2
1686	M	58	No	No	Yes	Older Adult (55-70)	2.16	None	Yes	No	No	No	low	<1 year	private	preventive	51	0	1	4
1687	F	60	No	No	Yes	Older Adult (55-70)	4.25	Secondary	No	Yes	Yes	No	low	>1 year	private	curative	28	2	2	0
1688	M	55	No	No	Yes	Older Adult (55-70)	5.32	Primary	No	Yes	No	No	low	>1 year	private	curative	31	1	4	2
1689	F	55	No	No	Yes	Older Adult (55-70)	2.15	None	Yes	No	No	No	low	>1 year	public	curative	35	3	3	1
1690	F	57	No	No	Yes	Older Adult (55-70)	3.46	Primary	No	Yes	No	No	low	>1 year	private	preventive	36	1	4	2
1691	F	56	No	No	Yes	Older Adult (55-70)	2.77	Primary	No	Yes	No	No	low	>1 year	public	curative	30	2	1	2
1692	M	55	No	No	Yes	Older Adult (55-70)	1.29	Secondary	No	Yes	Yes	No	low	>1 year	public	preventive	24	0	1	3
1693	F	58	No	No	Yes	Older Adult (55-70)	1.02	Secondary	No	Yes	Yes	No	low	<1 year	private	preventive	50	1	1	2
1694	F	60	No	No	Yes	Older Adult (55-70)	2.09	Secondary	No	Yes	Yes	No	low	<1 year	private	curative	25	2	2	3
1695	M	60	No	No	Yes	Older Adult (55-70)	2.76	None	Yes	No	No	No	low	<1 year	private	curative	14	2	2	0
1696	F	60	No	No	Yes	Older Adult (55-70)	4.75	Primary	No	Yes	No	No	low	<1 year	private	curative	24	2	4	2
1697	F	58	No	No	Yes	Older Adult (55-70)	4.21	Graduate	No	No	No	Yes	low	<1 year	private	preventive	3	3	3	0
1698	M	55	No	No	Yes	Older Adult (55-70)	6.71	Graduate	No	No	No	Yes	low	<1 year	public	preventive	54	3	4	3
1699	M	55	No	No	Yes	Older Adult (55-70)	3.9	Graduate	No	No	No	Yes	low	<1 year	private	preventive	70	4	1	0
1700	M	57	No	No	Yes	Older Adult (55-70)	3.31	Primary	No	Yes	No	No	low	>1 year	public	preventive	27	4	1	4
1701	F	55	No	No	Yes	Older Adult (55-70)	1.38	Primary	No	Yes	No	No	low	>1 year	public	preventive	42	1	1	0
1702	M	55	No	No	Yes	Older Adult (55-70)	2.11	Secondary	No	Yes	Yes	No	low	>1 year	private	preventive	24	4	2	0
1703	F	57	No	No	Yes	Older Adult (55-70)	2.72	Secondary	No	Yes	Yes	No	low	>1 year	private	curative	14	2	2	1
1704	F	56	No	No	Yes	Older Adult (55-70)	6.44	Secondary	No	Yes	Yes	No	low	>1 year	private	curative	16	3	2	1
1705	F	55	No	No	Yes	Older Adult (55-70)	5.81	None	Yes	No	No	No	low	>1 year	private	curative	15	1	2	2
1706	M	58	No	No	Yes	Older Adult (55-70)	3.27	Primary	No	Yes	No	No	low	<1 year	private	preventive	25	4	4	1
1707	F	60	No	No	Yes	Older Adult (55-70)	1.22	None	Yes	No	No	No	low	<1 year	public	curative	32	0	0	2
1708	F	60	No	No	Yes	Older Adult (55-70)	5.05	None	Yes	No	No	No	low	<1 year	private	preventive	53	2	2	4
1709	M	60	No	No	Yes	Older Adult (55-70)	3.38	Primary	No	Yes	No	No	low	<1 year	public	preventive	24	3	1	3
1710	F	58	No	No	Yes	Older Adult (55-70)	3.26	Primary	No	Yes	No	No	low	<1 year	public	curative	3	4	2	4
1711	F	55	No	No	Yes	Older Adult (55-70)	1.79	Primary	No	Yes	No	No	low	<1 year	private	curative	35	1	2	1
1712	M	55	No	No	Yes	Older Adult (55-70)	6.21	Primary	No	Yes	No	No	low	<1 year	private	curative	21	5	3	1
1713	M	57	No	No	Yes	Older Adult (55-70)	1.19	Primary	No	Yes	No	No	low	>1 year	private	preventive	22	0	2	1
1714	M	55	No	No	Yes	Older Adult (55-70)	3.95	Primary	No	Yes	No	No	low	>1 year	private	preventive	23	1	3	2
1715	F	55	No	No	Yes	Older Adult (55-70)	3.05	None	Yes	No	No	No	low	>1 year	private	preventive	33	1	0	2
1716	M	57	No	No	Yes	Older Adult (55-70)	5.24	None	Yes	No	No	No	low	>1 year	public	preventive	62	2	2	4
1717	F	56	No	No	Yes	Older Adult (55-70)	5.71	None	Yes	No	No	No	low	>1 year	private	preventive	27	3	0	3
1718	F	55	No	No	Yes	Older Adult (55-70)	6.74	None	Yes	No	No	No	low	>1 year	public	preventive	2	1	3	4
1719	F	58	No	No	Yes	Older Adult (55-70)	4.82	None	Yes	No	No	No	low	<1 year	public	curative	24	3	0	1
1720	M	60	No	No	Yes	Older Adult (55-70)	3.34	Secondary	No	Yes	Yes	No	low	<1 year	private	curative	24	1	4	1
1721	F	55	No	No	Yes	Older Adult (55-70)	4.69	Primary	No	Yes	No	No	low	<1 year	private	curative	22	3	0	1
1722	F	55	No	No	Yes	Older Adult (55-70)	1.26	None	Yes	No	No	No	low	<1 year	private	preventive	12	1	0	2
1723	M	57	No	No	Yes	Older Adult (55-70)	3.55	Primary	No	Yes	No	No	low	<1 year	private	curative	18	4	1	2
1724	F	56	No	No	Yes	Older Adult (55-70)	2.99	Primary	No	Yes	No	No	low	<1 year	private	preventive	14	0	1	2
1725	F	55	No	No	Yes	Older Adult (55-70)	7.03	Secondary	No	Yes	Yes	No	low	<1 year	public	preventive	15	2	2	2
1726	M	58	No	No	Yes	Older Adult (55-70)	4.41	Secondary	No	Yes	Yes	No	low	>1 year	private	curative	25	1	1	4
1727	M	60	No	No	Yes	Older Adult (55-70)	3.12	Secondary	No	Yes	Yes	No	low	>1 year	public	curative	28	3	2	0
1728	M	60	No	No	Yes	Older Adult (55-70)	1.98	None	Yes	No	No	No	low	>1 year	public	curative	29	1	4	2
1729	F	60	No	No	Yes	Older Adult (55-70)	1.22	Primary	No	Yes	No	No	low	>1 year	private	preventive	32	1	3	1
1730	M	58	No	No	Yes	Older Adult (55-70)	4.62	Graduate	No	No	No	Yes	low	>1 year	public	preventive	33	2	4	2
1731	F	55	No	No	Yes	Older Adult (55-70)	6.12	Graduate	No	No	No	Yes	low	>1 year	private	preventive	34	3	1	2
1732	F	55	No	No	Yes	Older Adult (55-70)	3.88	Graduate	No	No	No	Yes	low	<1 year	public	preventive	35	1	1	3
1733	F	57	No	No	Yes	Older Adult (55-70)	7.13	Primary	No	Yes	No	No	low	<1 year	public	preventive	54	3	1	2
1734	M	55	No	No	Yes	Older Adult (55-70)	2.83	Primary	No	Yes	No	No	low	<1 year	private	preventive	50	1	2	3
1735	F	55	No	No	Yes	Older Adult (55-70)	4.25	Secondary	No	Yes	Yes	No	low	<1 year	private	curative	28	3	2	0
1736	F	57	No	No	Yes	Older Adult (55-70)	2.25	Secondary	No	Yes	Yes	No	low	<1 year	private	curative	20	1	2	2
1737	M	56	No	No	Yes	Older Adult (55-70)	1.83	Secondary	No	Yes	Yes	No	low	<1 year	private	curative	51	4	2	0
1738	F	55	No	No	Yes	Older Adult (55-70)	5.12	None	Yes	No	No	No	low	<1 year	private	preventive	28	0	4	3
1739	F	58	No	No	Yes	Older Adult (55-70)	4.25	Primary	No	Yes	No	No	low	>1 year	public	curative	31	2	0	0
1740	M	60	No	No	Yes	Older Adult (55-70)	4.71	None	Yes	No	No	No	low	>1 year	private	preventive	35	1	2	4
1741	M	60	No	No	Yes	Older Adult (55-70)	2.47	None	Yes	No	No	No	low	>1 year	public	preventive	36	3	1	0
1742	M	60	No	No	Yes	Older Adult (55-70)	4.22	Primary	No	Yes	No	No	low	>1 year	public	curative	30	1	2	0
1743	F	58	No	No	Yes	Older Adult (55-70)	3.23	Primary	No	Yes	No	No	low	>1 year	public	curative	24	4	2	1
1744	M	55	No	No	Yes	Older Adult (55-70)	3.05	Primary	No	Yes	No	No	low	>1 year	public	curative	41	2	3	1
